# Supplementary material for: PAIRWISE: Deep Learning based Prediction of Effective Personalized Drug Combinations in Cancer
Source: Research Square preprint supplement (doi:10.21203/rs.3.rs-8518203/v1), 2026-01-19
Supplement: Supplementary file 1 [file 3724dd7c102fa4984e5d839b.xlsx]

## Sheet: raw dose response data
block_id	drug_row	drug_col	conc_r	conc_c	response	conc_r_unit	conc_c_unit	sample	type
1	Acalabrutinib	Adavosertib	1	0.01	23.7226	uM	uM	FARAGE	GCB-DLBCL
1	Acalabrutinib	Adavosertib	0.333333	0.01	8.49988	uM	uM	FARAGE	GCB-DLBCL
1	Acalabrutinib	Adavosertib	0.111111	0.01	2.63403	uM	uM	FARAGE	GCB-DLBCL
1	Acalabrutinib	Adavosertib	0.037037	0.01	-25.1191	uM	uM	FARAGE	GCB-DLBCL
1	Acalabrutinib	Adavosertib	0.0123457	0.01	-36.2821	uM	uM	FARAGE	GCB-DLBCL
1	Acalabrutinib	Adavosertib	0.00411523	0.01	-10.7356	uM	uM	FARAGE	GCB-DLBCL
1	Acalabrutinib	Adavosertib	0	0.01	4.62552	uM	uM	FARAGE	GCB-DLBCL
1	Acalabrutinib	Adavosertib	1	0.00333333	34.5917	uM	uM	FARAGE	GCB-DLBCL
1	Acalabrutinib	Adavosertib	0.333333	0.00333333	19.9973	uM	uM	FARAGE	GCB-DLBCL
1	Acalabrutinib	Adavosertib	0.111111	0.00333333	2.18035	uM	uM	FARAGE	GCB-DLBCL
1	Acalabrutinib	Adavosertib	0.037037	0.00333333	-10.6589	uM	uM	FARAGE	GCB-DLBCL
1	Acalabrutinib	Adavosertib	0.0123457	0.00333333	-0.71211	uM	uM	FARAGE	GCB-DLBCL
1	Acalabrutinib	Adavosertib	0.00411523	0.00333333	-7.2063	uM	uM	FARAGE	GCB-DLBCL
1	Acalabrutinib	Adavosertib	0	0.00333333	-3.72598	uM	uM	FARAGE	GCB-DLBCL
1	Acalabrutinib	Adavosertib	1	0.00111111	28.3616	uM	uM	FARAGE	GCB-DLBCL
1	Acalabrutinib	Adavosertib	0.333333	0.00111111	25.7332	uM	uM	FARAGE	GCB-DLBCL
1	Acalabrutinib	Adavosertib	0.111111	0.00111111	9.12183	uM	uM	FARAGE	GCB-DLBCL
1	Acalabrutinib	Adavosertib	0.037037	0.00111111	7.80765	uM	uM	FARAGE	GCB-DLBCL
1	Acalabrutinib	Adavosertib	0.0123457	0.00111111	2.21443	uM	uM	FARAGE	GCB-DLBCL
1	Acalabrutinib	Adavosertib	0.00411523	0.00111111	-7.61525	uM	uM	FARAGE	GCB-DLBCL
1	Acalabrutinib	Adavosertib	0	0.00111111	9.81406	uM	uM	FARAGE	GCB-DLBCL
1	Acalabrutinib	Adavosertib	1	0.00037037	23.0005	uM	uM	FARAGE	GCB-DLBCL
1	Acalabrutinib	Adavosertib	0.333333	0.00037037	9.94398	uM	uM	FARAGE	GCB-DLBCL
1	Acalabrutinib	Adavosertib	0.111111	0.00037037	2.54031	uM	uM	FARAGE	GCB-DLBCL
1	Acalabrutinib	Adavosertib	0.037037	0.00037037	2.42316	uM	uM	FARAGE	GCB-DLBCL
1	Acalabrutinib	Adavosertib	0.0123457	0.00037037	-1.12532	uM	uM	FARAGE	GCB-DLBCL
1	Acalabrutinib	Adavosertib	0.00411523	0.00037037	8.15696	uM	uM	FARAGE	GCB-DLBCL
1	Acalabrutinib	Adavosertib	0	0.00037037	-1.11254	uM	uM	FARAGE	GCB-DLBCL
1	Acalabrutinib	Adavosertib	1	0.000123457	19.9867	uM	uM	FARAGE	GCB-DLBCL
1	Acalabrutinib	Adavosertib	0.333333	0.000123457	6.91734	uM	uM	FARAGE	GCB-DLBCL
1	Acalabrutinib	Adavosertib	0.111111	0.000123457	2.47215	uM	uM	FARAGE	GCB-DLBCL
1	Acalabrutinib	Adavosertib	0.037037	0.000123457	4.87046	uM	uM	FARAGE	GCB-DLBCL
1	Acalabrutinib	Adavosertib	0.0123457	0.000123457	5.06216	uM	uM	FARAGE	GCB-DLBCL
1	Acalabrutinib	Adavosertib	0.00411523	0.000123457	7.77783	uM	uM	FARAGE	GCB-DLBCL
1	Acalabrutinib	Adavosertib	0	0.000123457	7.90137	uM	uM	FARAGE	GCB-DLBCL
1	Acalabrutinib	Adavosertib	1	4.12e-05	19.9824	uM	uM	FARAGE	GCB-DLBCL
1	Acalabrutinib	Adavosertib	0.333333	4.12e-05	13.4669	uM	uM	FARAGE	GCB-DLBCL
1	Acalabrutinib	Adavosertib	0.111111	4.12e-05	-0.803698	uM	uM	FARAGE	GCB-DLBCL
1	Acalabrutinib	Adavosertib	0.037037	4.12e-05	-1.32127	uM	uM	FARAGE	GCB-DLBCL
1	Acalabrutinib	Adavosertib	0.0123457	4.12e-05	-0.844166	uM	uM	FARAGE	GCB-DLBCL
1	Acalabrutinib	Adavosertib	0.00411523	4.12e-05	0.572244	uM	uM	FARAGE	GCB-DLBCL
1	Acalabrutinib	Adavosertib	0	4.12e-05	7.96527	uM	uM	FARAGE	GCB-DLBCL
1	Acalabrutinib	Adavosertib	1	0	15.648	uM	uM	FARAGE	GCB-DLBCL
1	Acalabrutinib	Adavosertib	0.333333	0	-7.54922	uM	uM	FARAGE	GCB-DLBCL
1	Acalabrutinib	Adavosertib	0.111111	0	-37.935	uM	uM	FARAGE	GCB-DLBCL
1	Acalabrutinib	Adavosertib	0.037037	0	-53.3749	uM	uM	FARAGE	GCB-DLBCL
1	Acalabrutinib	Adavosertib	0.0123457	0	-48.7359	uM	uM	FARAGE	GCB-DLBCL
1	Acalabrutinib	Adavosertib	0.00411523	0	-11.2894	uM	uM	FARAGE	GCB-DLBCL
1	Acalabrutinib	Adavosertib	0	0	2.71922	uM	uM	FARAGE	GCB-DLBCL
2	Acalabrutinib	AZD2461	1	10	35.6311	uM	uM	FARAGE	GCB-DLBCL
2	Acalabrutinib	AZD2461	0.333333	10	47.0241	uM	uM	FARAGE	GCB-DLBCL
2	Acalabrutinib	AZD2461	0.111111	10	46.7813	uM	uM	FARAGE	GCB-DLBCL
2	Acalabrutinib	AZD2461	0.037037	10	30.2359	uM	uM	FARAGE	GCB-DLBCL
2	Acalabrutinib	AZD2461	0.0123457	10	27.7141	uM	uM	FARAGE	GCB-DLBCL
2	Acalabrutinib	AZD2461	0.00411523	10	28.5341	uM	uM	FARAGE	GCB-DLBCL
2	Acalabrutinib	AZD2461	0	10	49.3372	uM	uM	FARAGE	GCB-DLBCL
2	Acalabrutinib	AZD2461	1	3.33333	43.5374	uM	uM	FARAGE	GCB-DLBCL
2	Acalabrutinib	AZD2461	0.333333	3.33333	33.3052	uM	uM	FARAGE	GCB-DLBCL
2	Acalabrutinib	AZD2461	0.111111	3.33333	36.1657	uM	uM	FARAGE	GCB-DLBCL
2	Acalabrutinib	AZD2461	0.037037	3.33333	37.7248	uM	uM	FARAGE	GCB-DLBCL
2	Acalabrutinib	AZD2461	0.0123457	3.33333	34.236	uM	uM	FARAGE	GCB-DLBCL
2	Acalabrutinib	AZD2461	0.00411523	3.33333	39.7376	uM	uM	FARAGE	GCB-DLBCL
2	Acalabrutinib	AZD2461	0	3.33333	41.1157	uM	uM	FARAGE	GCB-DLBCL
2	Acalabrutinib	AZD2461	1	1.11111	24.3339	uM	uM	FARAGE	GCB-DLBCL
2	Acalabrutinib	AZD2461	0.333333	1.11111	30.417	uM	uM	FARAGE	GCB-DLBCL
2	Acalabrutinib	AZD2461	0.111111	1.11111	29.9164	uM	uM	FARAGE	GCB-DLBCL
2	Acalabrutinib	AZD2461	0.037037	1.11111	19.5671	uM	uM	FARAGE	GCB-DLBCL
2	Acalabrutinib	AZD2461	0.0123457	1.11111	24.9281	uM	uM	FARAGE	GCB-DLBCL
2	Acalabrutinib	AZD2461	0.00411523	1.11111	20.5404	uM	uM	FARAGE	GCB-DLBCL
2	Acalabrutinib	AZD2461	0	1.11111	9.59893	uM	uM	FARAGE	GCB-DLBCL
2	Acalabrutinib	AZD2461	1	0.37037	24.73	uM	uM	FARAGE	GCB-DLBCL
2	Acalabrutinib	AZD2461	0.333333	0.37037	15.9738	uM	uM	FARAGE	GCB-DLBCL
2	Acalabrutinib	AZD2461	0.111111	0.37037	22.2359	uM	uM	FARAGE	GCB-DLBCL
2	Acalabrutinib	AZD2461	0.037037	0.37037	18.9984	uM	uM	FARAGE	GCB-DLBCL
2	Acalabrutinib	AZD2461	0.0123457	0.37037	18.9728	uM	uM	FARAGE	GCB-DLBCL
2	Acalabrutinib	AZD2461	0.00411523	0.37037	6.68304	uM	uM	FARAGE	GCB-DLBCL
2	Acalabrutinib	AZD2461	0	0.37037	12.715	uM	uM	FARAGE	GCB-DLBCL
2	Acalabrutinib	AZD2461	1	0.123457	6.67239	uM	uM	FARAGE	GCB-DLBCL
2	Acalabrutinib	AZD2461	0.333333	0.123457	34.8792	uM	uM	FARAGE	GCB-DLBCL
2	Acalabrutinib	AZD2461	0.111111	0.123457	8.81511	uM	uM	FARAGE	GCB-DLBCL
2	Acalabrutinib	AZD2461	0.037037	0.123457	12.6256	uM	uM	FARAGE	GCB-DLBCL
2	Acalabrutinib	AZD2461	0.0123457	0.123457	7.79913	uM	uM	FARAGE	GCB-DLBCL
2	Acalabrutinib	AZD2461	0.00411523	0.123457	6.20594	uM	uM	FARAGE	GCB-DLBCL
2	Acalabrutinib	AZD2461	0	0.123457	2.45298	uM	uM	FARAGE	GCB-DLBCL
2	Acalabrutinib	AZD2461	1	0.0411523	15.8439	uM	uM	FARAGE	GCB-DLBCL
2	Acalabrutinib	AZD2461	0.333333	0.0411523	14.3806	uM	uM	FARAGE	GCB-DLBCL
2	Acalabrutinib	AZD2461	0.111111	0.0411523	1.26234	uM	uM	FARAGE	GCB-DLBCL
2	Acalabrutinib	AZD2461	0.037037	0.0411523	5.83959	uM	uM	FARAGE	GCB-DLBCL
2	Acalabrutinib	AZD2461	0.0123457	0.0411523	-4.25207	uM	uM	FARAGE	GCB-DLBCL
2	Acalabrutinib	AZD2461	0.00411523	0.0411523	1.64573	uM	uM	FARAGE	GCB-DLBCL
2	Acalabrutinib	AZD2461	0	0.0411523	5.748	uM	uM	FARAGE	GCB-DLBCL
2	Acalabrutinib	AZD2461	1	0	10.2997	uM	uM	FARAGE	GCB-DLBCL
2	Acalabrutinib	AZD2461	0.333333	0	-6.63334	uM	uM	FARAGE	GCB-DLBCL
2	Acalabrutinib	AZD2461	0.111111	0	-5.19989	uM	uM	FARAGE	GCB-DLBCL
2	Acalabrutinib	AZD2461	0.037037	0	-6.27764	uM	uM	FARAGE	GCB-DLBCL
2	Acalabrutinib	AZD2461	0.0123457	0	-3.78561	uM	uM	FARAGE	GCB-DLBCL
2	Acalabrutinib	AZD2461	0.00411523	0	-27.3108	uM	uM	FARAGE	GCB-DLBCL
2	Acalabrutinib	AZD2461	0	0	-24.495	uM	uM	FARAGE	GCB-DLBCL
3	Acalabrutinib	AZD3463	1	10	75.0435	uM	uM	FARAGE	GCB-DLBCL
3	Acalabrutinib	AZD3463	0.333333	10	72.2171	uM	uM	FARAGE	GCB-DLBCL
3	Acalabrutinib	AZD3463	0.111111	10	58.1147	uM	uM	FARAGE	GCB-DLBCL
3	Acalabrutinib	AZD3463	0.037037	10	84.1021	uM	uM	FARAGE	GCB-DLBCL
3	Acalabrutinib	AZD3463	0.0123457	10	74.5877	uM	uM	FARAGE	GCB-DLBCL
3	Acalabrutinib	AZD3463	0.00411523	10	92.477	uM	uM	FARAGE	GCB-DLBCL
3	Acalabrutinib	AZD3463	0	10	92.8413	uM	uM	FARAGE	GCB-DLBCL
3	Acalabrutinib	AZD3463	1	3.33333	65.6057	uM	uM	FARAGE	GCB-DLBCL
3	Acalabrutinib	AZD3463	0.333333	3.33333	68.2298	uM	uM	FARAGE	GCB-DLBCL
3	Acalabrutinib	AZD3463	0.111111	3.33333	63.3203	uM	uM	FARAGE	GCB-DLBCL
3	Acalabrutinib	AZD3463	0.037037	3.33333	50.3511	uM	uM	FARAGE	GCB-DLBCL
3	Acalabrutinib	AZD3463	0.0123457	3.33333	66.6025	uM	uM	FARAGE	GCB-DLBCL
3	Acalabrutinib	AZD3463	0.00411523	3.33333	53.6887	uM	uM	FARAGE	GCB-DLBCL
3	Acalabrutinib	AZD3463	0	3.33333	48.1487	uM	uM	FARAGE	GCB-DLBCL
3	Acalabrutinib	AZD3463	1	1.11111	15.0431	uM	uM	FARAGE	GCB-DLBCL
3	Acalabrutinib	AZD3463	0.333333	1.11111	34.9559	uM	uM	FARAGE	GCB-DLBCL
3	Acalabrutinib	AZD3463	0.111111	1.11111	28.877	uM	uM	FARAGE	GCB-DLBCL
3	Acalabrutinib	AZD3463	0.037037	1.11111	-0.880375	uM	uM	FARAGE	GCB-DLBCL
3	Acalabrutinib	AZD3463	0.0123457	1.11111	42.3042	uM	uM	FARAGE	GCB-DLBCL
3	Acalabrutinib	AZD3463	0.00411523	1.11111	21.6331	uM	uM	FARAGE	GCB-DLBCL
3	Acalabrutinib	AZD3463	0	1.11111	26.057	uM	uM	FARAGE	GCB-DLBCL
3	Acalabrutinib	AZD3463	1	0.37037	24.7385	uM	uM	FARAGE	GCB-DLBCL
3	Acalabrutinib	AZD3463	0.333333	0.37037	8.09945	uM	uM	FARAGE	GCB-DLBCL
3	Acalabrutinib	AZD3463	0.111111	0.37037	4.6809	uM	uM	FARAGE	GCB-DLBCL
3	Acalabrutinib	AZD3463	0.037037	0.37037	1.99078	uM	uM	FARAGE	GCB-DLBCL
3	Acalabrutinib	AZD3463	0.0123457	0.37037	3.60102	uM	uM	FARAGE	GCB-DLBCL
3	Acalabrutinib	AZD3463	0.00411523	0.37037	8.97912	uM	uM	FARAGE	GCB-DLBCL
3	Acalabrutinib	AZD3463	0	0.37037	10.9387	uM	uM	FARAGE	GCB-DLBCL
3	Acalabrutinib	AZD3463	1	0.123457	25.582	uM	uM	FARAGE	GCB-DLBCL
3	Acalabrutinib	AZD3463	0.333333	0.123457	13.8482	uM	uM	FARAGE	GCB-DLBCL
3	Acalabrutinib	AZD3463	0.111111	0.123457	10.8151	uM	uM	FARAGE	GCB-DLBCL
3	Acalabrutinib	AZD3463	0.037037	0.123457	3.16651	uM	uM	FARAGE	GCB-DLBCL
3	Acalabrutinib	AZD3463	0.0123457	0.123457	2.39547	uM	uM	FARAGE	GCB-DLBCL
3	Acalabrutinib	AZD3463	0.00411523	0.123457	5.56056	uM	uM	FARAGE	GCB-DLBCL
3	Acalabrutinib	AZD3463	0	0.123457	7.26452	uM	uM	FARAGE	GCB-DLBCL
3	Acalabrutinib	AZD3463	1	0.0411523	23.0069	uM	uM	FARAGE	GCB-DLBCL
3	Acalabrutinib	AZD3463	0.333333	0.0411523	17.8801	uM	uM	FARAGE	GCB-DLBCL
3	Acalabrutinib	AZD3463	0.111111	0.0411523	3.02381	uM	uM	FARAGE	GCB-DLBCL
3	Acalabrutinib	AZD3463	0.037037	0.0411523	-0.0837777	uM	uM	FARAGE	GCB-DLBCL
3	Acalabrutinib	AZD3463	0.0123457	0.0411523	1.06426	uM	uM	FARAGE	GCB-DLBCL
3	Acalabrutinib	AZD3463	0.00411523	0.0411523	4.35076	uM	uM	FARAGE	GCB-DLBCL
3	Acalabrutinib	AZD3463	0	0.0411523	10.0718	uM	uM	FARAGE	GCB-DLBCL
3	Acalabrutinib	AZD3463	1	0	12.4531	uM	uM	FARAGE	GCB-DLBCL
3	Acalabrutinib	AZD3463	0.333333	0	3.81401	uM	uM	FARAGE	GCB-DLBCL
3	Acalabrutinib	AZD3463	0.111111	0	-12.7122	uM	uM	FARAGE	GCB-DLBCL
3	Acalabrutinib	AZD3463	0.037037	0	2.36139	uM	uM	FARAGE	GCB-DLBCL
3	Acalabrutinib	AZD3463	0.0123457	0	-4.31384	uM	uM	FARAGE	GCB-DLBCL
3	Acalabrutinib	AZD3463	0.00411523	0	-4.1264	uM	uM	FARAGE	GCB-DLBCL
3	Acalabrutinib	AZD3463	0	0	8.95569	uM	uM	FARAGE	GCB-DLBCL
4	Acalabrutinib	AZD4573	1	0.01	79.8252	uM	uM	FARAGE	GCB-DLBCL
4	Acalabrutinib	AZD4573	0.333333	0.01	85.4781	uM	uM	FARAGE	GCB-DLBCL
4	Acalabrutinib	AZD4573	0.111111	0.01	97.8956	uM	uM	FARAGE	GCB-DLBCL
4	Acalabrutinib	AZD4573	0.037037	0.01	98.5708	uM	uM	FARAGE	GCB-DLBCL
4	Acalabrutinib	AZD4573	0.0123457	0.01	92.8136	uM	uM	FARAGE	GCB-DLBCL
4	Acalabrutinib	AZD4573	0.00411523	0.01	86.6836	uM	uM	FARAGE	GCB-DLBCL
4	Acalabrutinib	AZD4573	0	0.01	91.2715	uM	uM	FARAGE	GCB-DLBCL
4	Acalabrutinib	AZD4573	1	0.00333333	55.4885	uM	uM	FARAGE	GCB-DLBCL
4	Acalabrutinib	AZD4573	0.333333	0.00333333	67.4162	uM	uM	FARAGE	GCB-DLBCL
4	Acalabrutinib	AZD4573	0.111111	0.00333333	52.7771	uM	uM	FARAGE	GCB-DLBCL
4	Acalabrutinib	AZD4573	0.037037	0.00333333	57.676	uM	uM	FARAGE	GCB-DLBCL
4	Acalabrutinib	AZD4573	0.0123457	0.00333333	54.8729	uM	uM	FARAGE	GCB-DLBCL
4	Acalabrutinib	AZD4573	0.00411523	0.00333333	40.3233	uM	uM	FARAGE	GCB-DLBCL
4	Acalabrutinib	AZD4573	0	0.00333333	73.0243	uM	uM	FARAGE	GCB-DLBCL
4	Acalabrutinib	AZD4573	1	0.00111111	14.8961	uM	uM	FARAGE	GCB-DLBCL
4	Acalabrutinib	AZD4573	0.333333	0.00111111	55.0774	uM	uM	FARAGE	GCB-DLBCL
4	Acalabrutinib	AZD4573	0.111111	0.00111111	26.7194	uM	uM	FARAGE	GCB-DLBCL
4	Acalabrutinib	AZD4573	0.037037	0.00111111	2.57013	uM	uM	FARAGE	GCB-DLBCL
4	Acalabrutinib	AZD4573	0.0123457	0.00111111	-0.0283992	uM	uM	FARAGE	GCB-DLBCL
4	Acalabrutinib	AZD4573	0.00411523	0.00111111	23.6054	uM	uM	FARAGE	GCB-DLBCL
4	Acalabrutinib	AZD4573	0	0.00111111	31.8483	uM	uM	FARAGE	GCB-DLBCL
4	Acalabrutinib	AZD4573	1	0.00037037	22.8046	uM	uM	FARAGE	GCB-DLBCL
4	Acalabrutinib	AZD4573	0.333333	0.00037037	7.60957	uM	uM	FARAGE	GCB-DLBCL
4	Acalabrutinib	AZD4573	0.111111	0.00037037	8.92587	uM	uM	FARAGE	GCB-DLBCL
4	Acalabrutinib	AZD4573	0.037037	0.00037037	-22.1052	uM	uM	FARAGE	GCB-DLBCL
4	Acalabrutinib	AZD4573	0.0123457	0.00037037	21.5543	uM	uM	FARAGE	GCB-DLBCL
4	Acalabrutinib	AZD4573	0.00411523	0.00037037	15.7843	uM	uM	FARAGE	GCB-DLBCL
4	Acalabrutinib	AZD4573	0	0.00037037	19.648	uM	uM	FARAGE	GCB-DLBCL
4	Acalabrutinib	AZD4573	1	0.000123457	8.51266	uM	uM	FARAGE	GCB-DLBCL
4	Acalabrutinib	AZD4573	0.333333	0.000123457	9.44984	uM	uM	FARAGE	GCB-DLBCL
4	Acalabrutinib	AZD4573	0.111111	0.000123457	5.3497	uM	uM	FARAGE	GCB-DLBCL
4	Acalabrutinib	AZD4573	0.037037	0.000123457	-57.1065	uM	uM	FARAGE	GCB-DLBCL
4	Acalabrutinib	AZD4573	0.0123457	0.000123457	6.28474	uM	uM	FARAGE	GCB-DLBCL
4	Acalabrutinib	AZD4573	0.00411523	0.000123457	8.47219	uM	uM	FARAGE	GCB-DLBCL
4	Acalabrutinib	AZD4573	0	0.000123457	8.14205	uM	uM	FARAGE	GCB-DLBCL
4	Acalabrutinib	AZD4573	1	4.12e-05	27.6225	uM	uM	FARAGE	GCB-DLBCL
4	Acalabrutinib	AZD4573	0.333333	4.12e-05	13.0026	uM	uM	FARAGE	GCB-DLBCL
4	Acalabrutinib	AZD4573	0.111111	4.12e-05	-10.1754	uM	uM	FARAGE	GCB-DLBCL
4	Acalabrutinib	AZD4573	0.037037	4.12e-05	-51.5708	uM	uM	FARAGE	GCB-DLBCL
4	Acalabrutinib	AZD4573	0.0123457	4.12e-05	13.0388	uM	uM	FARAGE	GCB-DLBCL
4	Acalabrutinib	AZD4573	0.00411523	4.12e-05	5.81616	uM	uM	FARAGE	GCB-DLBCL
4	Acalabrutinib	AZD4573	0	4.12e-05	7.72245	uM	uM	FARAGE	GCB-DLBCL
4	Acalabrutinib	AZD4573	1	0	9.28796	uM	uM	FARAGE	GCB-DLBCL
4	Acalabrutinib	AZD4573	0.333333	0	9.33269	uM	uM	FARAGE	GCB-DLBCL
4	Acalabrutinib	AZD4573	0.111111	0	-14.7271	uM	uM	FARAGE	GCB-DLBCL
4	Acalabrutinib	AZD4573	0.037037	0	-31.7027	uM	uM	FARAGE	GCB-DLBCL
4	Acalabrutinib	AZD4573	0.0123457	0	-11.5812	uM	uM	FARAGE	GCB-DLBCL
4	Acalabrutinib	AZD4573	0.00411523	0	0.120697	uM	uM	FARAGE	GCB-DLBCL
4	Acalabrutinib	AZD4573	0	0	0.904515	uM	uM	FARAGE	GCB-DLBCL
5	Acalabrutinib	AZD7648	1	10	63.397	uM	uM	FARAGE	GCB-DLBCL
5	Acalabrutinib	AZD7648	0.333333	10	52.6067	uM	uM	FARAGE	GCB-DLBCL
5	Acalabrutinib	AZD7648	0.111111	10	40.5512	uM	uM	FARAGE	GCB-DLBCL
5	Acalabrutinib	AZD7648	0.037037	10	55.2052	uM	uM	FARAGE	GCB-DLBCL
5	Acalabrutinib	AZD7648	0.0123457	10	57.1584	uM	uM	FARAGE	GCB-DLBCL
5	Acalabrutinib	AZD7648	0.00411523	10	60.9284	uM	uM	FARAGE	GCB-DLBCL
5	Acalabrutinib	AZD7648	0	10	51.5034	uM	uM	FARAGE	GCB-DLBCL
5	Acalabrutinib	AZD7648	1	3.33333	25.6928	uM	uM	FARAGE	GCB-DLBCL
5	Acalabrutinib	AZD7648	0.333333	3.33333	45.3287	uM	uM	FARAGE	GCB-DLBCL
5	Acalabrutinib	AZD7648	0.111111	3.33333	46.8644	uM	uM	FARAGE	GCB-DLBCL
5	Acalabrutinib	AZD7648	0.037037	3.33333	47.563	uM	uM	FARAGE	GCB-DLBCL
5	Acalabrutinib	AZD7648	0.0123457	3.33333	52.7217	uM	uM	FARAGE	GCB-DLBCL
5	Acalabrutinib	AZD7648	0.00411523	3.33333	43.399	uM	uM	FARAGE	GCB-DLBCL
5	Acalabrutinib	AZD7648	0	3.33333	15.8759	uM	uM	FARAGE	GCB-DLBCL
5	Acalabrutinib	AZD7648	1	1.11111	39.7312	uM	uM	FARAGE	GCB-DLBCL
5	Acalabrutinib	AZD7648	0.333333	1.11111	39.9399	uM	uM	FARAGE	GCB-DLBCL
5	Acalabrutinib	AZD7648	0.111111	1.11111	-1.24673	uM	uM	FARAGE	GCB-DLBCL
5	Acalabrutinib	AZD7648	0.037037	1.11111	-14.872	uM	uM	FARAGE	GCB-DLBCL
5	Acalabrutinib	AZD7648	0.0123457	1.11111	2.69153	uM	uM	FARAGE	GCB-DLBCL
5	Acalabrutinib	AZD7648	0.00411523	1.11111	9.89712	uM	uM	FARAGE	GCB-DLBCL
5	Acalabrutinib	AZD7648	0	1.11111	10.0058	uM	uM	FARAGE	GCB-DLBCL
5	Acalabrutinib	AZD7648	1	0.37037	25.5224	uM	uM	FARAGE	GCB-DLBCL
5	Acalabrutinib	AZD7648	0.333333	0.37037	21.8418	uM	uM	FARAGE	GCB-DLBCL
5	Acalabrutinib	AZD7648	0.111111	0.37037	23.9867	uM	uM	FARAGE	GCB-DLBCL
5	Acalabrutinib	AZD7648	0.037037	0.37037	-1.38943	uM	uM	FARAGE	GCB-DLBCL
5	Acalabrutinib	AZD7648	0.0123457	0.37037	7.00253	uM	uM	FARAGE	GCB-DLBCL
5	Acalabrutinib	AZD7648	0.00411523	0.37037	9.56911	uM	uM	FARAGE	GCB-DLBCL
5	Acalabrutinib	AZD7648	0	0.37037	14.3338	uM	uM	FARAGE	GCB-DLBCL
5	Acalabrutinib	AZD7648	1	0.123457	14.5106	uM	uM	FARAGE	GCB-DLBCL
5	Acalabrutinib	AZD7648	0.333333	0.123457	15.1197	uM	uM	FARAGE	GCB-DLBCL
5	Acalabrutinib	AZD7648	0.111111	0.123457	29.8696	uM	uM	FARAGE	GCB-DLBCL
5	Acalabrutinib	AZD7648	0.037037	0.123457	3.49452	uM	uM	FARAGE	GCB-DLBCL
5	Acalabrutinib	AZD7648	0.0123457	0.123457	10.6149	uM	uM	FARAGE	GCB-DLBCL
5	Acalabrutinib	AZD7648	0.00411523	0.123457	16.402	uM	uM	FARAGE	GCB-DLBCL
5	Acalabrutinib	AZD7648	0	0.123457	11.0281	uM	uM	FARAGE	GCB-DLBCL
5	Acalabrutinib	AZD7648	1	0.0411523	17.9206	uM	uM	FARAGE	GCB-DLBCL
5	Acalabrutinib	AZD7648	0.333333	0.0411523	8.6362	uM	uM	FARAGE	GCB-DLBCL
5	Acalabrutinib	AZD7648	0.111111	0.0411523	13.7268	uM	uM	FARAGE	GCB-DLBCL
5	Acalabrutinib	AZD7648	0.037037	0.0411523	19.6565	uM	uM	FARAGE	GCB-DLBCL
5	Acalabrutinib	AZD7648	0.0123457	0.0411523	0.829967	uM	uM	FARAGE	GCB-DLBCL
5	Acalabrutinib	AZD7648	0.00411523	0.0411523	4.52115	uM	uM	FARAGE	GCB-DLBCL
5	Acalabrutinib	AZD7648	0	0.0411523	8.18252	uM	uM	FARAGE	GCB-DLBCL
5	Acalabrutinib	AZD7648	1	0	26.9153	uM	uM	FARAGE	GCB-DLBCL
5	Acalabrutinib	AZD7648	0.333333	0	9.73099	uM	uM	FARAGE	GCB-DLBCL
5	Acalabrutinib	AZD7648	0.111111	0	3.17077	uM	uM	FARAGE	GCB-DLBCL
5	Acalabrutinib	AZD7648	0.037037	0	6.51265	uM	uM	FARAGE	GCB-DLBCL
5	Acalabrutinib	AZD7648	0.0123457	0	7.76718	uM	uM	FARAGE	GCB-DLBCL
5	Acalabrutinib	AZD7648	0.00411523	0	10.1144	uM	uM	FARAGE	GCB-DLBCL
5	Acalabrutinib	AZD7648	0	0	4.95353	uM	uM	FARAGE	GCB-DLBCL
6	Acalabrutinib	AZD8055	1	0.01	34.7131	uM	uM	FARAGE	GCB-DLBCL
6	Acalabrutinib	AZD8055	0.333333	0.01	10.1527	uM	uM	FARAGE	GCB-DLBCL
6	Acalabrutinib	AZD8055	0.111111	0.01	36.7386	uM	uM	FARAGE	GCB-DLBCL
6	Acalabrutinib	AZD8055	0.037037	0.01	17.9739	uM	uM	FARAGE	GCB-DLBCL
6	Acalabrutinib	AZD8055	0.0123457	0.01	22.4957	uM	uM	FARAGE	GCB-DLBCL
6	Acalabrutinib	AZD8055	0.00411523	0.01	7.91628	uM	uM	FARAGE	GCB-DLBCL
6	Acalabrutinib	AZD8055	0	0.01	34.0975	uM	uM	FARAGE	GCB-DLBCL
6	Acalabrutinib	AZD8055	1	0.00333333	25.0815	uM	uM	FARAGE	GCB-DLBCL
6	Acalabrutinib	AZD8055	0.333333	0.00333333	17.3157	uM	uM	FARAGE	GCB-DLBCL
6	Acalabrutinib	AZD8055	0.111111	0.00333333	3.76502	uM	uM	FARAGE	GCB-DLBCL
6	Acalabrutinib	AZD8055	0.037037	0.00333333	-10.3501	uM	uM	FARAGE	GCB-DLBCL
6	Acalabrutinib	AZD8055	0.0123457	0.00333333	10.83	uM	uM	FARAGE	GCB-DLBCL
6	Acalabrutinib	AZD8055	0.00411523	0.00333333	-29.4514	uM	uM	FARAGE	GCB-DLBCL
6	Acalabrutinib	AZD8055	0	0.00333333	16.4531	uM	uM	FARAGE	GCB-DLBCL
6	Acalabrutinib	AZD8055	1	0.00111111	1.20058	uM	uM	FARAGE	GCB-DLBCL
6	Acalabrutinib	AZD8055	0.333333	0.00111111	-8.56307	uM	uM	FARAGE	GCB-DLBCL
6	Acalabrutinib	AZD8055	0.111111	0.00111111	6.9855	uM	uM	FARAGE	GCB-DLBCL
6	Acalabrutinib	AZD8055	0.037037	0.00111111	-33.1916	uM	uM	FARAGE	GCB-DLBCL
6	Acalabrutinib	AZD8055	0.0123457	0.00111111	-8.6504	uM	uM	FARAGE	GCB-DLBCL
6	Acalabrutinib	AZD8055	0.00411523	0.00111111	-17.9178	uM	uM	FARAGE	GCB-DLBCL
6	Acalabrutinib	AZD8055	0	0.00111111	12.5276	uM	uM	FARAGE	GCB-DLBCL
6	Acalabrutinib	AZD8055	1	0.00037037	-2.65249	uM	uM	FARAGE	GCB-DLBCL
6	Acalabrutinib	AZD8055	0.333333	0.00037037	2.01208	uM	uM	FARAGE	GCB-DLBCL
6	Acalabrutinib	AZD8055	0.111111	0.00037037	-4.22864	uM	uM	FARAGE	GCB-DLBCL
6	Acalabrutinib	AZD8055	0.037037	0.00037037	-12.0349	uM	uM	FARAGE	GCB-DLBCL
6	Acalabrutinib	AZD8055	0.0123457	0.00037037	-2.3479	uM	uM	FARAGE	GCB-DLBCL
6	Acalabrutinib	AZD8055	0.00411523	0.00037037	4.6383	uM	uM	FARAGE	GCB-DLBCL
6	Acalabrutinib	AZD8055	0	0.00037037	8.42746	uM	uM	FARAGE	GCB-DLBCL
6	Acalabrutinib	AZD8055	1	0.000123457	15.2177	uM	uM	FARAGE	GCB-DLBCL
6	Acalabrutinib	AZD8055	0.333333	0.000123457	8.70649	uM	uM	FARAGE	GCB-DLBCL
6	Acalabrutinib	AZD8055	0.111111	0.000123457	2.00569	uM	uM	FARAGE	GCB-DLBCL
6	Acalabrutinib	AZD8055	0.037037	0.000123457	-7.42568	uM	uM	FARAGE	GCB-DLBCL
6	Acalabrutinib	AZD8055	0.0123457	0.000123457	-18.4992	uM	uM	FARAGE	GCB-DLBCL
6	Acalabrutinib	AZD8055	0.00411523	0.000123457	5.08985	uM	uM	FARAGE	GCB-DLBCL
6	Acalabrutinib	AZD8055	0	0.000123457	2.51475	uM	uM	FARAGE	GCB-DLBCL
6	Acalabrutinib	AZD8055	1	4.12e-05	5.38165	uM	uM	FARAGE	GCB-DLBCL
6	Acalabrutinib	AZD8055	0.333333	4.12e-05	5.49241	uM	uM	FARAGE	GCB-DLBCL
6	Acalabrutinib	AZD8055	0.111111	4.12e-05	-4.55452	uM	uM	FARAGE	GCB-DLBCL
6	Acalabrutinib	AZD8055	0.037037	4.12e-05	-28.3034	uM	uM	FARAGE	GCB-DLBCL
6	Acalabrutinib	AZD8055	0.0123457	4.12e-05	-6.57371	uM	uM	FARAGE	GCB-DLBCL
6	Acalabrutinib	AZD8055	0.00411523	4.12e-05	14.583	uM	uM	FARAGE	GCB-DLBCL
6	Acalabrutinib	AZD8055	0	4.12e-05	5.92691	uM	uM	FARAGE	GCB-DLBCL
6	Acalabrutinib	AZD8055	1	0	21.4499	uM	uM	FARAGE	GCB-DLBCL
6	Acalabrutinib	AZD8055	0.333333	0	3.20272	uM	uM	FARAGE	GCB-DLBCL
6	Acalabrutinib	AZD8055	0.111111	0	0.482787	uM	uM	FARAGE	GCB-DLBCL
6	Acalabrutinib	AZD8055	0.037037	0	2.58078	uM	uM	FARAGE	GCB-DLBCL
6	Acalabrutinib	AZD8055	0.0123457	0	-2.95494	uM	uM	FARAGE	GCB-DLBCL
6	Acalabrutinib	AZD8055	0.00411523	0	11.4286	uM	uM	FARAGE	GCB-DLBCL
6	Acalabrutinib	AZD8055	0	0	6.96207	uM	uM	FARAGE	GCB-DLBCL
1	Acalabrutinib	Adavosertib	1	0.01	22.8876	uM	uM	FARAGE	GCB-DLBCL
1	Acalabrutinib	Adavosertib	0.333333	0.01	4.73628	uM	uM	FARAGE	GCB-DLBCL
1	Acalabrutinib	Adavosertib	0.111111	0.01	2.25277	uM	uM	FARAGE	GCB-DLBCL
1	Acalabrutinib	Adavosertib	0.037037	0.01	-0.494856	uM	uM	FARAGE	GCB-DLBCL
1	Acalabrutinib	Adavosertib	0.0123457	0.01	6.93012	uM	uM	FARAGE	GCB-DLBCL
1	Acalabrutinib	Adavosertib	0.00411523	0.01	0.640402	uM	uM	FARAGE	GCB-DLBCL
1	Acalabrutinib	Adavosertib	0	0.01	-0.0624783	uM	uM	FARAGE	GCB-DLBCL
1	Acalabrutinib	Adavosertib	1	0.00333333	17.1453	uM	uM	FARAGE	GCB-DLBCL
1	Acalabrutinib	Adavosertib	0.333333	0.00333333	6.77463	uM	uM	FARAGE	GCB-DLBCL
1	Acalabrutinib	Adavosertib	0.111111	0.00333333	5.37739	uM	uM	FARAGE	GCB-DLBCL
1	Acalabrutinib	Adavosertib	0.037037	0.00333333	6.45727	uM	uM	FARAGE	GCB-DLBCL
1	Acalabrutinib	Adavosertib	0.0123457	0.00333333	-0.942144	uM	uM	FARAGE	GCB-DLBCL
1	Acalabrutinib	Adavosertib	0.00411523	0.00333333	-0.220094	uM	uM	FARAGE	GCB-DLBCL
1	Acalabrutinib	Adavosertib	0	0.00333333	4.25704	uM	uM	FARAGE	GCB-DLBCL
1	Acalabrutinib	Adavosertib	1	0.00111111	19.8418	uM	uM	FARAGE	GCB-DLBCL
1	Acalabrutinib	Adavosertib	0.333333	0.00111111	9.60532	uM	uM	FARAGE	GCB-DLBCL
1	Acalabrutinib	Adavosertib	0.111111	0.00111111	-0.124247	uM	uM	FARAGE	GCB-DLBCL
1	Acalabrutinib	Adavosertib	0.037037	0.00111111	-1.14449	uM	uM	FARAGE	GCB-DLBCL
1	Acalabrutinib	Adavosertib	0.0123457	0.00111111	2.78099	uM	uM	FARAGE	GCB-DLBCL
1	Acalabrutinib	Adavosertib	0.00411523	0.00111111	-2.63971	uM	uM	FARAGE	GCB-DLBCL
1	Acalabrutinib	Adavosertib	0	0.00111111	-0.588574	uM	uM	FARAGE	GCB-DLBCL
1	Acalabrutinib	Adavosertib	1	0.00037037	16.8003	uM	uM	FARAGE	GCB-DLBCL
1	Acalabrutinib	Adavosertib	0.333333	0.00037037	6.32521	uM	uM	FARAGE	GCB-DLBCL
1	Acalabrutinib	Adavosertib	0.111111	0.00037037	5.10263	uM	uM	FARAGE	GCB-DLBCL
1	Acalabrutinib	Adavosertib	0.037037	0.00037037	3.62445	uM	uM	FARAGE	GCB-DLBCL
1	Acalabrutinib	Adavosertib	0.0123457	0.00037037	-1.46824	uM	uM	FARAGE	GCB-DLBCL
1	Acalabrutinib	Adavosertib	0.00411523	0.00037037	-1.25737	uM	uM	FARAGE	GCB-DLBCL
1	Acalabrutinib	Adavosertib	0	0.00037037	-1.64076	uM	uM	FARAGE	GCB-DLBCL
1	Acalabrutinib	Adavosertib	1	0.000123457	18.0122	uM	uM	FARAGE	GCB-DLBCL
1	Acalabrutinib	Adavosertib	0.333333	0.000123457	14.6938	uM	uM	FARAGE	GCB-DLBCL
1	Acalabrutinib	Adavosertib	0.111111	0.000123457	1.61166	uM	uM	FARAGE	GCB-DLBCL
1	Acalabrutinib	Adavosertib	0.037037	0.000123457	-0.835647	uM	uM	FARAGE	GCB-DLBCL
1	Acalabrutinib	Adavosertib	0.0123457	0.000123457	4.18249	uM	uM	FARAGE	GCB-DLBCL
1	Acalabrutinib	Adavosertib	0.00411523	0.000123457	4.02062	uM	uM	FARAGE	GCB-DLBCL
1	Acalabrutinib	Adavosertib	0	0.000123457	1.1239	uM	uM	FARAGE	GCB-DLBCL
1	Acalabrutinib	Adavosertib	1	4.12e-05	14.8194	uM	uM	FARAGE	GCB-DLBCL
1	Acalabrutinib	Adavosertib	0.333333	4.12e-05	4.05683	uM	uM	FARAGE	GCB-DLBCL
1	Acalabrutinib	Adavosertib	0.111111	4.12e-05	1.47747	uM	uM	FARAGE	GCB-DLBCL
1	Acalabrutinib	Adavosertib	0.037037	4.12e-05	-3.14237	uM	uM	FARAGE	GCB-DLBCL
1	Acalabrutinib	Adavosertib	0.0123457	4.12e-05	-3.49381	uM	uM	FARAGE	GCB-DLBCL
1	Acalabrutinib	Adavosertib	0.00411523	4.12e-05	-11.5258	uM	uM	FARAGE	GCB-DLBCL
1	Acalabrutinib	Adavosertib	0	4.12e-05	2.99399	uM	uM	FARAGE	GCB-DLBCL
1	Acalabrutinib	Adavosertib	1	0	9.31352	uM	uM	FARAGE	GCB-DLBCL
1	Acalabrutinib	Adavosertib	0.333333	0	-13.8751	uM	uM	FARAGE	GCB-DLBCL
1	Acalabrutinib	Adavosertib	0.111111	0	8.551	uM	uM	FARAGE	GCB-DLBCL
1	Acalabrutinib	Adavosertib	0.037037	0	-1.78773	uM	uM	FARAGE	GCB-DLBCL
1	Acalabrutinib	Adavosertib	0.0123457	0	0.416758	uM	uM	FARAGE	GCB-DLBCL
1	Acalabrutinib	Adavosertib	0.00411523	0	-8.57159	uM	uM	FARAGE	GCB-DLBCL
1	Acalabrutinib	Adavosertib	0	0	4.52115	uM	uM	FARAGE	GCB-DLBCL
2	Acalabrutinib	AZD2461	1	10	42.8899	uM	uM	FARAGE	GCB-DLBCL
2	Acalabrutinib	AZD2461	0.333333	10	47.2861	uM	uM	FARAGE	GCB-DLBCL
2	Acalabrutinib	AZD2461	0.111111	10	54.5769	uM	uM	FARAGE	GCB-DLBCL
2	Acalabrutinib	AZD2461	0.037037	10	46.4384	uM	uM	FARAGE	GCB-DLBCL
2	Acalabrutinib	AZD2461	0.0123457	10	34.7173	uM	uM	FARAGE	GCB-DLBCL
2	Acalabrutinib	AZD2461	0.00411523	10	24.8557	uM	uM	FARAGE	GCB-DLBCL
2	Acalabrutinib	AZD2461	0	10	46.6322	uM	uM	FARAGE	GCB-DLBCL
2	Acalabrutinib	AZD2461	1	3.33333	40.6449	uM	uM	FARAGE	GCB-DLBCL
2	Acalabrutinib	AZD2461	0.333333	3.33333	44.6045	uM	uM	FARAGE	GCB-DLBCL
2	Acalabrutinib	AZD2461	0.111111	3.33333	38.1295	uM	uM	FARAGE	GCB-DLBCL
2	Acalabrutinib	AZD2461	0.037037	3.33333	33.122	uM	uM	FARAGE	GCB-DLBCL
2	Acalabrutinib	AZD2461	0.0123457	3.33333	41.744	uM	uM	FARAGE	GCB-DLBCL
2	Acalabrutinib	AZD2461	0.00411523	3.33333	26.8365	uM	uM	FARAGE	GCB-DLBCL
2	Acalabrutinib	AZD2461	0	3.33333	26.8302	uM	uM	FARAGE	GCB-DLBCL
2	Acalabrutinib	AZD2461	1	1.11111	27.7588	uM	uM	FARAGE	GCB-DLBCL
2	Acalabrutinib	AZD2461	0.333333	1.11111	19.2284	uM	uM	FARAGE	GCB-DLBCL
2	Acalabrutinib	AZD2461	0.111111	1.11111	34.5341	uM	uM	FARAGE	GCB-DLBCL
2	Acalabrutinib	AZD2461	0.037037	1.11111	18.4957	uM	uM	FARAGE	GCB-DLBCL
2	Acalabrutinib	AZD2461	0.0123457	1.11111	24.6214	uM	uM	FARAGE	GCB-DLBCL
2	Acalabrutinib	AZD2461	0.00411523	1.11111	22.583	uM	uM	FARAGE	GCB-DLBCL
2	Acalabrutinib	AZD2461	0	1.11111	14.3274	uM	uM	FARAGE	GCB-DLBCL
2	Acalabrutinib	AZD2461	1	0.37037	7.52437	uM	uM	FARAGE	GCB-DLBCL
2	Acalabrutinib	AZD2461	0.333333	0.37037	15.8034	uM	uM	FARAGE	GCB-DLBCL
2	Acalabrutinib	AZD2461	0.111111	0.37037	14.0526	uM	uM	FARAGE	GCB-DLBCL
2	Acalabrutinib	AZD2461	0.037037	0.37037	23.2923	uM	uM	FARAGE	GCB-DLBCL
2	Acalabrutinib	AZD2461	0.0123457	0.37037	13.4094	uM	uM	FARAGE	GCB-DLBCL
2	Acalabrutinib	AZD2461	0.00411523	0.37037	12.7917	uM	uM	FARAGE	GCB-DLBCL
2	Acalabrutinib	AZD2461	0	0.37037	2.57439	uM	uM	FARAGE	GCB-DLBCL
2	Acalabrutinib	AZD2461	1	0.123457	7.63513	uM	uM	FARAGE	GCB-DLBCL
2	Acalabrutinib	AZD2461	0.333333	0.123457	19.6693	uM	uM	FARAGE	GCB-DLBCL
2	Acalabrutinib	AZD2461	0.111111	0.123457	17.3881	uM	uM	FARAGE	GCB-DLBCL
2	Acalabrutinib	AZD2461	0.037037	0.123457	5.18996	uM	uM	FARAGE	GCB-DLBCL
2	Acalabrutinib	AZD2461	0.0123457	0.123457	-3.04014	uM	uM	FARAGE	GCB-DLBCL
2	Acalabrutinib	AZD2461	0.00411523	0.123457	5.22616	uM	uM	FARAGE	GCB-DLBCL
2	Acalabrutinib	AZD2461	0	0.123457	4.27195	uM	uM	FARAGE	GCB-DLBCL
2	Acalabrutinib	AZD2461	1	0.0411523	-0.784528	uM	uM	FARAGE	GCB-DLBCL
2	Acalabrutinib	AZD2461	0.333333	0.0411523	30.1635	uM	uM	FARAGE	GCB-DLBCL
2	Acalabrutinib	AZD2461	0.111111	0.0411523	4.49985	uM	uM	FARAGE	GCB-DLBCL
2	Acalabrutinib	AZD2461	0.037037	0.0411523	0.766069	uM	uM	FARAGE	GCB-DLBCL
2	Acalabrutinib	AZD2461	0.0123457	0.0411523	-0.957053	uM	uM	FARAGE	GCB-DLBCL
2	Acalabrutinib	AZD2461	0.00411523	0.0411523	-0.871856	uM	uM	FARAGE	GCB-DLBCL
2	Acalabrutinib	AZD2461	0	0.0411523	0.695781	uM	uM	FARAGE	GCB-DLBCL
2	Acalabrutinib	AZD2461	1	0	13.1538	uM	uM	FARAGE	GCB-DLBCL
2	Acalabrutinib	AZD2461	0.333333	0	0.450837	uM	uM	FARAGE	GCB-DLBCL
2	Acalabrutinib	AZD2461	0.111111	0	4.03127	uM	uM	FARAGE	GCB-DLBCL
2	Acalabrutinib	AZD2461	0.037037	0	11.2944	uM	uM	FARAGE	GCB-DLBCL
2	Acalabrutinib	AZD2461	0.0123457	0	0.676611	uM	uM	FARAGE	GCB-DLBCL
2	Acalabrutinib	AZD2461	0.00411523	0	-2.57581	uM	uM	FARAGE	GCB-DLBCL
2	Acalabrutinib	AZD2461	0	0	2.78525	uM	uM	FARAGE	GCB-DLBCL
3	Acalabrutinib	AZD3463	1	10	82.0957	uM	uM	FARAGE	GCB-DLBCL
3	Acalabrutinib	AZD3463	0.333333	10	66.971	uM	uM	FARAGE	GCB-DLBCL
3	Acalabrutinib	AZD3463	0.111111	10	58.8368	uM	uM	FARAGE	GCB-DLBCL
3	Acalabrutinib	AZD3463	0.037037	10	73.5014	uM	uM	FARAGE	GCB-DLBCL
3	Acalabrutinib	AZD3463	0.0123457	10	70.0552	uM	uM	FARAGE	GCB-DLBCL
3	Acalabrutinib	AZD3463	0.00411523	10	90.3109	uM	uM	FARAGE	GCB-DLBCL
3	Acalabrutinib	AZD3463	0	10	86.4152	uM	uM	FARAGE	GCB-DLBCL
3	Acalabrutinib	AZD3463	1	3.33333	75.7932	uM	uM	FARAGE	GCB-DLBCL
3	Acalabrutinib	AZD3463	0.333333	3.33333	63.8251	uM	uM	FARAGE	GCB-DLBCL
3	Acalabrutinib	AZD3463	0.111111	3.33333	71.446	uM	uM	FARAGE	GCB-DLBCL
3	Acalabrutinib	AZD3463	0.037037	3.33333	64.2766	uM	uM	FARAGE	GCB-DLBCL
3	Acalabrutinib	AZD3463	0.0123457	3.33333	65.2479	uM	uM	FARAGE	GCB-DLBCL
3	Acalabrutinib	AZD3463	0.00411523	3.33333	52.1296	uM	uM	FARAGE	GCB-DLBCL
3	Acalabrutinib	AZD3463	0	3.33333	43.0816	uM	uM	FARAGE	GCB-DLBCL
3	Acalabrutinib	AZD3463	1	1.11111	46.6556	uM	uM	FARAGE	GCB-DLBCL
3	Acalabrutinib	AZD3463	0.333333	1.11111	37.8398	uM	uM	FARAGE	GCB-DLBCL
3	Acalabrutinib	AZD3463	0.111111	1.11111	51.4863	uM	uM	FARAGE	GCB-DLBCL
3	Acalabrutinib	AZD3463	0.037037	1.11111	30.2061	uM	uM	FARAGE	GCB-DLBCL
3	Acalabrutinib	AZD3463	0.0123457	1.11111	30.6683	uM	uM	FARAGE	GCB-DLBCL
3	Acalabrutinib	AZD3463	0.00411523	1.11111	23.1326	uM	uM	FARAGE	GCB-DLBCL
3	Acalabrutinib	AZD3463	0	1.11111	23.9228	uM	uM	FARAGE	GCB-DLBCL
3	Acalabrutinib	AZD3463	1	0.37037	27.418	uM	uM	FARAGE	GCB-DLBCL
3	Acalabrutinib	AZD3463	0.333333	0.37037	14.4211	uM	uM	FARAGE	GCB-DLBCL
3	Acalabrutinib	AZD3463	0.111111	0.37037	33.3499	uM	uM	FARAGE	GCB-DLBCL
3	Acalabrutinib	AZD3463	0.037037	0.37037	-0.377709	uM	uM	FARAGE	GCB-DLBCL
3	Acalabrutinib	AZD3463	0.0123457	0.37037	10.3039	uM	uM	FARAGE	GCB-DLBCL
3	Acalabrutinib	AZD3463	0.00411523	0.37037	2.39973	uM	uM	FARAGE	GCB-DLBCL
3	Acalabrutinib	AZD3463	0	0.37037	1.89281	uM	uM	FARAGE	GCB-DLBCL
3	Acalabrutinib	AZD3463	1	0.123457	-7.53005	uM	uM	FARAGE	GCB-DLBCL
3	Acalabrutinib	AZD3463	0.333333	0.123457	-2.70147	uM	uM	FARAGE	GCB-DLBCL
3	Acalabrutinib	AZD3463	0.111111	0.123457	21.2795	uM	uM	FARAGE	GCB-DLBCL
3	Acalabrutinib	AZD3463	0.037037	0.123457	3.2368	uM	uM	FARAGE	GCB-DLBCL
3	Acalabrutinib	AZD3463	0.0123457	0.123457	2.71709	uM	uM	FARAGE	GCB-DLBCL
3	Acalabrutinib	AZD3463	0.00411523	0.123457	6.73416	uM	uM	FARAGE	GCB-DLBCL
3	Acalabrutinib	AZD3463	0	0.123457	3.32413	uM	uM	FARAGE	GCB-DLBCL
3	Acalabrutinib	AZD3463	1	0.0411523	13.6692	uM	uM	FARAGE	GCB-DLBCL
3	Acalabrutinib	AZD3463	0.333333	0.0411523	3.60102	uM	uM	FARAGE	GCB-DLBCL
3	Acalabrutinib	AZD3463	0.111111	0.0411523	11.0856	uM	uM	FARAGE	GCB-DLBCL
3	Acalabrutinib	AZD3463	0.037037	0.0411523	2.0632	uM	uM	FARAGE	GCB-DLBCL
3	Acalabrutinib	AZD3463	0.0123457	0.0411523	1.81613	uM	uM	FARAGE	GCB-DLBCL
3	Acalabrutinib	AZD3463	0.00411523	0.0411523	2.24425	uM	uM	FARAGE	GCB-DLBCL
3	Acalabrutinib	AZD3463	0	0.0411523	2.25277	uM	uM	FARAGE	GCB-DLBCL
3	Acalabrutinib	AZD3463	1	0	18.3487	uM	uM	FARAGE	GCB-DLBCL
3	Acalabrutinib	AZD3463	0.333333	0	0.0035499	uM	uM	FARAGE	GCB-DLBCL
3	Acalabrutinib	AZD3463	0.111111	0	-5.25953	uM	uM	FARAGE	GCB-DLBCL
3	Acalabrutinib	AZD3463	0.037037	0	4.85981	uM	uM	FARAGE	GCB-DLBCL
3	Acalabrutinib	AZD3463	0.0123457	0	9.85453	uM	uM	FARAGE	GCB-DLBCL
3	Acalabrutinib	AZD3463	0.00411523	0	2.86193	uM	uM	FARAGE	GCB-DLBCL
3	Acalabrutinib	AZD3463	0	0	5.65428	uM	uM	FARAGE	GCB-DLBCL
4	Acalabrutinib	AZD4573	1	0.01	93.2502	uM	uM	FARAGE	GCB-DLBCL
4	Acalabrutinib	AZD4573	0.333333	0.01	84.5515	uM	uM	FARAGE	GCB-DLBCL
4	Acalabrutinib	AZD4573	0.111111	0.01	96.8882	uM	uM	FARAGE	GCB-DLBCL
4	Acalabrutinib	AZD4573	0.037037	0.01	95.493	uM	uM	FARAGE	GCB-DLBCL
4	Acalabrutinib	AZD4573	0.0123457	0.01	85.8274	uM	uM	FARAGE	GCB-DLBCL
4	Acalabrutinib	AZD4573	0.00411523	0.01	82.773	uM	uM	FARAGE	GCB-DLBCL
4	Acalabrutinib	AZD4573	0	0.01	91.6059	uM	uM	FARAGE	GCB-DLBCL
4	Acalabrutinib	AZD4573	1	0.00333333	68.4705	uM	uM	FARAGE	GCB-DLBCL
4	Acalabrutinib	AZD4573	0.333333	0.00333333	64.1936	uM	uM	FARAGE	GCB-DLBCL
4	Acalabrutinib	AZD4573	0.111111	0.00333333	50.645	uM	uM	FARAGE	GCB-DLBCL
4	Acalabrutinib	AZD4573	0.037037	0.00333333	42.9219	uM	uM	FARAGE	GCB-DLBCL
4	Acalabrutinib	AZD4573	0.0123457	0.00333333	58.202	uM	uM	FARAGE	GCB-DLBCL
4	Acalabrutinib	AZD4573	0.00411523	0.00333333	50.6301	uM	uM	FARAGE	GCB-DLBCL
4	Acalabrutinib	AZD4573	0	0.00333333	68.4982	uM	uM	FARAGE	GCB-DLBCL
4	Acalabrutinib	AZD4573	1	0.00111111	37.3009	uM	uM	FARAGE	GCB-DLBCL
4	Acalabrutinib	AZD4573	0.333333	0.00111111	35.7269	uM	uM	FARAGE	GCB-DLBCL
4	Acalabrutinib	AZD4573	0.111111	0.00111111	19.697	uM	uM	FARAGE	GCB-DLBCL
4	Acalabrutinib	AZD4573	0.037037	0.00111111	27.5096	uM	uM	FARAGE	GCB-DLBCL
4	Acalabrutinib	AZD4573	0.0123457	0.00111111	20.5	uM	uM	FARAGE	GCB-DLBCL
4	Acalabrutinib	AZD4573	0.00411523	0.00111111	6.71286	uM	uM	FARAGE	GCB-DLBCL
4	Acalabrutinib	AZD4573	0	0.00111111	16.2997	uM	uM	FARAGE	GCB-DLBCL
4	Acalabrutinib	AZD4573	1	0.00037037	12.6703	uM	uM	FARAGE	GCB-DLBCL
4	Acalabrutinib	AZD4573	0.333333	0.00037037	19.1943	uM	uM	FARAGE	GCB-DLBCL
4	Acalabrutinib	AZD4573	0.111111	0.00037037	2.18674	uM	uM	FARAGE	GCB-DLBCL
4	Acalabrutinib	AZD4573	0.037037	0.00037037	2.25703	uM	uM	FARAGE	GCB-DLBCL
4	Acalabrutinib	AZD4573	0.0123457	0.00037037	10.9898	uM	uM	FARAGE	GCB-DLBCL
4	Acalabrutinib	AZD4573	0.00411523	0.00037037	-4.10511	uM	uM	FARAGE	GCB-DLBCL
4	Acalabrutinib	AZD4573	0	0.00037037	8.88327	uM	uM	FARAGE	GCB-DLBCL
4	Acalabrutinib	AZD4573	1	0.000123457	11.6245	uM	uM	FARAGE	GCB-DLBCL
4	Acalabrutinib	AZD4573	0.333333	0.000123457	21.2092	uM	uM	FARAGE	GCB-DLBCL
4	Acalabrutinib	AZD4573	0.111111	0.000123457	-1.23821	uM	uM	FARAGE	GCB-DLBCL
4	Acalabrutinib	AZD4573	0.037037	0.000123457	12.1975	uM	uM	FARAGE	GCB-DLBCL
4	Acalabrutinib	AZD4573	0.0123457	0.000123457	4.22083	uM	uM	FARAGE	GCB-DLBCL
4	Acalabrutinib	AZD4573	0.00411523	0.000123457	-9.49812	uM	uM	FARAGE	GCB-DLBCL
4	Acalabrutinib	AZD4573	0	0.000123457	-8.88469	uM	uM	FARAGE	GCB-DLBCL
4	Acalabrutinib	AZD4573	1	4.12e-05	0.0035499	uM	uM	FARAGE	GCB-DLBCL
4	Acalabrutinib	AZD4573	0.333333	4.12e-05	7.68199	uM	uM	FARAGE	GCB-DLBCL
4	Acalabrutinib	AZD4573	0.111111	4.12e-05	1.47534	uM	uM	FARAGE	GCB-DLBCL
4	Acalabrutinib	AZD4573	0.037037	4.12e-05	5.23894	uM	uM	FARAGE	GCB-DLBCL
4	Acalabrutinib	AZD4573	0.0123457	4.12e-05	-2.15621	uM	uM	FARAGE	GCB-DLBCL
4	Acalabrutinib	AZD4573	0.00411523	4.12e-05	-10.3245	uM	uM	FARAGE	GCB-DLBCL
4	Acalabrutinib	AZD4573	0	4.12e-05	-5.17221	uM	uM	FARAGE	GCB-DLBCL
4	Acalabrutinib	AZD4573	1	0	2.73413	uM	uM	FARAGE	GCB-DLBCL
4	Acalabrutinib	AZD4573	0.333333	0	-0.567274	uM	uM	FARAGE	GCB-DLBCL
4	Acalabrutinib	AZD4573	0.111111	0	-1.53001	uM	uM	FARAGE	GCB-DLBCL
4	Acalabrutinib	AZD4573	0.037037	0	11.2837	uM	uM	FARAGE	GCB-DLBCL
4	Acalabrutinib	AZD4573	0.0123457	0	1.77353	uM	uM	FARAGE	GCB-DLBCL
4	Acalabrutinib	AZD4573	0.00411523	0	-0.991132	uM	uM	FARAGE	GCB-DLBCL
4	Acalabrutinib	AZD4573	0	0	1.71176	uM	uM	FARAGE	GCB-DLBCL
5	Acalabrutinib	AZD7648	1	10	73.4034	uM	uM	FARAGE	GCB-DLBCL
5	Acalabrutinib	AZD7648	0.333333	10	59.1967	uM	uM	FARAGE	GCB-DLBCL
5	Acalabrutinib	AZD7648	0.111111	10	46.2552	uM	uM	FARAGE	GCB-DLBCL
5	Acalabrutinib	AZD7648	0.037037	10	52.6983	uM	uM	FARAGE	GCB-DLBCL
5	Acalabrutinib	AZD7648	0.0123457	10	49.1072	uM	uM	FARAGE	GCB-DLBCL
5	Acalabrutinib	AZD7648	0.00411523	10	52.0721	uM	uM	FARAGE	GCB-DLBCL
5	Acalabrutinib	AZD7648	0	10	49.4501	uM	uM	FARAGE	GCB-DLBCL
5	Acalabrutinib	AZD7648	1	3.33333	59.71	uM	uM	FARAGE	GCB-DLBCL
5	Acalabrutinib	AZD7648	0.333333	3.33333	56.1211	uM	uM	FARAGE	GCB-DLBCL
5	Acalabrutinib	AZD7648	0.111111	3.33333	47.6184	uM	uM	FARAGE	GCB-DLBCL
5	Acalabrutinib	AZD7648	0.037037	3.33333	50.4448	uM	uM	FARAGE	GCB-DLBCL
5	Acalabrutinib	AZD7648	0.0123457	3.33333	46.1956	uM	uM	FARAGE	GCB-DLBCL
5	Acalabrutinib	AZD7648	0.00411523	3.33333	21.9419	uM	uM	FARAGE	GCB-DLBCL
5	Acalabrutinib	AZD7648	0	3.33333	28.6363	uM	uM	FARAGE	GCB-DLBCL
5	Acalabrutinib	AZD7648	1	1.11111	43.1583	uM	uM	FARAGE	GCB-DLBCL
5	Acalabrutinib	AZD7648	0.333333	1.11111	36.7727	uM	uM	FARAGE	GCB-DLBCL
5	Acalabrutinib	AZD7648	0.111111	1.11111	25.6331	uM	uM	FARAGE	GCB-DLBCL
5	Acalabrutinib	AZD7648	0.037037	1.11111	27.9611	uM	uM	FARAGE	GCB-DLBCL
5	Acalabrutinib	AZD7648	0.0123457	1.11111	0.152646	uM	uM	FARAGE	GCB-DLBCL
5	Acalabrutinib	AZD7648	0.00411523	1.11111	10.9387	uM	uM	FARAGE	GCB-DLBCL
5	Acalabrutinib	AZD7648	0	1.11111	2.64681	uM	uM	FARAGE	GCB-DLBCL
5	Acalabrutinib	AZD7648	1	0.37037	30.0549	uM	uM	FARAGE	GCB-DLBCL
5	Acalabrutinib	AZD7648	0.333333	0.37037	18.9345	uM	uM	FARAGE	GCB-DLBCL
5	Acalabrutinib	AZD7648	0.111111	0.37037	24.1507	uM	uM	FARAGE	GCB-DLBCL
5	Acalabrutinib	AZD7648	0.037037	0.37037	16.0846	uM	uM	FARAGE	GCB-DLBCL
5	Acalabrutinib	AZD7648	0.0123457	0.37037	18.2891	uM	uM	FARAGE	GCB-DLBCL
5	Acalabrutinib	AZD7648	0.00411523	0.37037	10.6064	uM	uM	FARAGE	GCB-DLBCL
5	Acalabrutinib	AZD7648	0	0.37037	4.5957	uM	uM	FARAGE	GCB-DLBCL
5	Acalabrutinib	AZD7648	1	0.123457	28.9984	uM	uM	FARAGE	GCB-DLBCL
5	Acalabrutinib	AZD7648	0.333333	0.123457	1.87151	uM	uM	FARAGE	GCB-DLBCL
5	Acalabrutinib	AZD7648	0.111111	0.123457	6.00359	uM	uM	FARAGE	GCB-DLBCL
5	Acalabrutinib	AZD7648	0.037037	0.123457	3.32839	uM	uM	FARAGE	GCB-DLBCL
5	Acalabrutinib	AZD7648	0.0123457	0.123457	11.912	uM	uM	FARAGE	GCB-DLBCL
5	Acalabrutinib	AZD7648	0.00411523	0.123457	12.1421	uM	uM	FARAGE	GCB-DLBCL
5	Acalabrutinib	AZD7648	0	0.123457	19.0303	uM	uM	FARAGE	GCB-DLBCL
5	Acalabrutinib	AZD7648	1	0.0411523	2.09302	uM	uM	FARAGE	GCB-DLBCL
5	Acalabrutinib	AZD7648	0.333333	0.0411523	3.03446	uM	uM	FARAGE	GCB-DLBCL
5	Acalabrutinib	AZD7648	0.111111	0.0411523	8.12714	uM	uM	FARAGE	GCB-DLBCL
5	Acalabrutinib	AZD7648	0.037037	0.0411523	4.03127	uM	uM	FARAGE	GCB-DLBCL
5	Acalabrutinib	AZD7648	0.0123457	0.0411523	6.74268	uM	uM	FARAGE	GCB-DLBCL
5	Acalabrutinib	AZD7648	0.00411523	0.0411523	3.72243	uM	uM	FARAGE	GCB-DLBCL
5	Acalabrutinib	AZD7648	0	0.0411523	3.36247	uM	uM	FARAGE	GCB-DLBCL
5	Acalabrutinib	AZD7648	1	0	10.7874	uM	uM	FARAGE	GCB-DLBCL
5	Acalabrutinib	AZD7648	0.333333	0	3.92903	uM	uM	FARAGE	GCB-DLBCL
5	Acalabrutinib	AZD7648	0.111111	0	3.4221	uM	uM	FARAGE	GCB-DLBCL
5	Acalabrutinib	AZD7648	0.037037	0	7.07282	uM	uM	FARAGE	GCB-DLBCL
5	Acalabrutinib	AZD7648	0.0123457	0	-2.74194	uM	uM	FARAGE	GCB-DLBCL
5	Acalabrutinib	AZD7648	0.00411523	0	2.945	uM	uM	FARAGE	GCB-DLBCL
5	Acalabrutinib	AZD7648	0	0	1.3092	uM	uM	FARAGE	GCB-DLBCL
6	Acalabrutinib	AZD8055	1	0.01	32.0293	uM	uM	FARAGE	GCB-DLBCL
6	Acalabrutinib	AZD8055	0.333333	0.01	33.2775	uM	uM	FARAGE	GCB-DLBCL
6	Acalabrutinib	AZD8055	0.111111	0.01	25.7077	uM	uM	FARAGE	GCB-DLBCL
6	Acalabrutinib	AZD8055	0.037037	0.01	29.0858	uM	uM	FARAGE	GCB-DLBCL
6	Acalabrutinib	AZD8055	0.0123457	0.01	24.2849	uM	uM	FARAGE	GCB-DLBCL
6	Acalabrutinib	AZD8055	0.00411523	0.01	31.5565	uM	uM	FARAGE	GCB-DLBCL
6	Acalabrutinib	AZD8055	0	0.01	29.3584	uM	uM	FARAGE	GCB-DLBCL
6	Acalabrutinib	AZD8055	1	0.00333333	10.8812	uM	uM	FARAGE	GCB-DLBCL
6	Acalabrutinib	AZD8055	0.333333	0.00333333	30.8664	uM	uM	FARAGE	GCB-DLBCL
6	Acalabrutinib	AZD8055	0.111111	0.00333333	24.6129	uM	uM	FARAGE	GCB-DLBCL
6	Acalabrutinib	AZD8055	0.037037	0.00333333	8.64259	uM	uM	FARAGE	GCB-DLBCL
6	Acalabrutinib	AZD8055	0.0123457	0.00333333	7.97166	uM	uM	FARAGE	GCB-DLBCL
6	Acalabrutinib	AZD8055	0.00411523	0.00333333	-0.330851	uM	uM	FARAGE	GCB-DLBCL
6	Acalabrutinib	AZD8055	0	0.00333333	16.1357	uM	uM	FARAGE	GCB-DLBCL
6	Acalabrutinib	AZD8055	1	0.00111111	15.1176	uM	uM	FARAGE	GCB-DLBCL
6	Acalabrutinib	AZD8055	0.333333	0.00111111	11.4413	uM	uM	FARAGE	GCB-DLBCL
6	Acalabrutinib	AZD8055	0.111111	0.00111111	0.695781	uM	uM	FARAGE	GCB-DLBCL
6	Acalabrutinib	AZD8055	0.037037	0.00111111	-2.53108	uM	uM	FARAGE	GCB-DLBCL
6	Acalabrutinib	AZD8055	0.0123457	0.00111111	0.484916	uM	uM	FARAGE	GCB-DLBCL
6	Acalabrutinib	AZD8055	0.00411523	0.00111111	-6.19032	uM	uM	FARAGE	GCB-DLBCL
6	Acalabrutinib	AZD8055	0	0.00111111	-0.309551	uM	uM	FARAGE	GCB-DLBCL
6	Acalabrutinib	AZD8055	1	0.00037037	-4.43525	uM	uM	FARAGE	GCB-DLBCL
6	Acalabrutinib	AZD8055	0.333333	0.00037037	11.8822	uM	uM	FARAGE	GCB-DLBCL
6	Acalabrutinib	AZD8055	0.111111	0.00037037	-2.22011	uM	uM	FARAGE	GCB-DLBCL
6	Acalabrutinib	AZD8055	0.037037	0.00037037	-10.7654	uM	uM	FARAGE	GCB-DLBCL
6	Acalabrutinib	AZD8055	0.0123457	0.00037037	14.1953	uM	uM	FARAGE	GCB-DLBCL
6	Acalabrutinib	AZD8055	0.00411523	0.00037037	2.93861	uM	uM	FARAGE	GCB-DLBCL
6	Acalabrutinib	AZD8055	0	0.00037037	4.05683	uM	uM	FARAGE	GCB-DLBCL
6	Acalabrutinib	AZD8055	1	0.000123457	-3.72811	uM	uM	FARAGE	GCB-DLBCL
6	Acalabrutinib	AZD8055	0.333333	0.000123457	-2.47996	uM	uM	FARAGE	GCB-DLBCL
6	Acalabrutinib	AZD8055	0.111111	0.000123457	-6.03483	uM	uM	FARAGE	GCB-DLBCL
6	Acalabrutinib	AZD8055	0.037037	0.000123457	4.88111	uM	uM	FARAGE	GCB-DLBCL
6	Acalabrutinib	AZD8055	0.0123457	0.000123457	3.27727	uM	uM	FARAGE	GCB-DLBCL
6	Acalabrutinib	AZD8055	0.00411523	0.000123457	9.06858	uM	uM	FARAGE	GCB-DLBCL
6	Acalabrutinib	AZD8055	0	0.000123457	0.870436	uM	uM	FARAGE	GCB-DLBCL
6	Acalabrutinib	AZD8055	1	4.12e-05	2.26981	uM	uM	FARAGE	GCB-DLBCL
6	Acalabrutinib	AZD8055	0.333333	4.12e-05	1.77566	uM	uM	FARAGE	GCB-DLBCL
6	Acalabrutinib	AZD8055	0.111111	4.12e-05	-2.09444	uM	uM	FARAGE	GCB-DLBCL
6	Acalabrutinib	AZD8055	0.037037	4.12e-05	-3.00606	uM	uM	FARAGE	GCB-DLBCL
6	Acalabrutinib	AZD8055	0.0123457	4.12e-05	-3.54706	uM	uM	FARAGE	GCB-DLBCL
6	Acalabrutinib	AZD8055	0.00411523	4.12e-05	-2.41393	uM	uM	FARAGE	GCB-DLBCL
6	Acalabrutinib	AZD8055	0	4.12e-05	3.15586	uM	uM	FARAGE	GCB-DLBCL
6	Acalabrutinib	AZD8055	1	0	5.50945	uM	uM	FARAGE	GCB-DLBCL
6	Acalabrutinib	AZD8055	0.333333	0	1.84595	uM	uM	FARAGE	GCB-DLBCL
6	Acalabrutinib	AZD8055	0.111111	0	8.06325	uM	uM	FARAGE	GCB-DLBCL
6	Acalabrutinib	AZD8055	0.037037	0	-1.30849	uM	uM	FARAGE	GCB-DLBCL
6	Acalabrutinib	AZD8055	0.0123457	0	-1.5364	uM	uM	FARAGE	GCB-DLBCL
6	Acalabrutinib	AZD8055	0.00411523	0	1.31559	uM	uM	FARAGE	GCB-DLBCL
6	Acalabrutinib	AZD8055	0	0	1.56693	uM	uM	FARAGE	GCB-DLBCL
1	Acalabrutinib	Adavosertib	1	0.01	2.94287	uM	uM	FARAGE	GCB-DLBCL
1	Acalabrutinib	Adavosertib	0.333333	0.01	2.2123	uM	uM	FARAGE	GCB-DLBCL
1	Acalabrutinib	Adavosertib	0.111111	0.01	8.73844	uM	uM	FARAGE	GCB-DLBCL
1	Acalabrutinib	Adavosertib	0.037037	0.01	10.8535	uM	uM	FARAGE	GCB-DLBCL
1	Acalabrutinib	Adavosertib	0.0123457	0.01	-8.94646	uM	uM	FARAGE	GCB-DLBCL
1	Acalabrutinib	Adavosertib	0.00411523	0.01	-9.63656	uM	uM	FARAGE	GCB-DLBCL
1	Acalabrutinib	Adavosertib	0	0.01	3.29644	uM	uM	FARAGE	GCB-DLBCL
1	Acalabrutinib	Adavosertib	1	0.00333333	2.53605	uM	uM	FARAGE	GCB-DLBCL
1	Acalabrutinib	Adavosertib	0.333333	0.00333333	-1.70679	uM	uM	FARAGE	GCB-DLBCL
1	Acalabrutinib	Adavosertib	0.111111	0.00333333	5.03021	uM	uM	FARAGE	GCB-DLBCL
1	Acalabrutinib	Adavosertib	0.037037	0.00333333	-0.940014	uM	uM	FARAGE	GCB-DLBCL
1	Acalabrutinib	Adavosertib	0.0123457	0.00333333	-2.61628	uM	uM	FARAGE	GCB-DLBCL
1	Acalabrutinib	Adavosertib	0.00411523	0.00333333	5.6202	uM	uM	FARAGE	GCB-DLBCL
1	Acalabrutinib	Adavosertib	0	0.00333333	-2.29679	uM	uM	FARAGE	GCB-DLBCL
1	Acalabrutinib	Adavosertib	1	0.00111111	1.1452	uM	uM	FARAGE	GCB-DLBCL
1	Acalabrutinib	Adavosertib	0.333333	0.00111111	11.7523	uM	uM	FARAGE	GCB-DLBCL
1	Acalabrutinib	Adavosertib	0.111111	0.00111111	2.2336	uM	uM	FARAGE	GCB-DLBCL
1	Acalabrutinib	Adavosertib	0.037037	0.00111111	4.02914	uM	uM	FARAGE	GCB-DLBCL
1	Acalabrutinib	Adavosertib	0.0123457	0.00111111	-0.192405	uM	uM	FARAGE	GCB-DLBCL
1	Acalabrutinib	Adavosertib	0.00411523	0.00111111	-3.43843	uM	uM	FARAGE	GCB-DLBCL
1	Acalabrutinib	Adavosertib	0	0.00111111	-7.48106	uM	uM	FARAGE	GCB-DLBCL
1	Acalabrutinib	Adavosertib	1	0.00037037	5.57547	uM	uM	FARAGE	GCB-DLBCL
1	Acalabrutinib	Adavosertib	0.333333	0.00037037	-7.88362	uM	uM	FARAGE	GCB-DLBCL
1	Acalabrutinib	Adavosertib	0.111111	0.00037037	2.88323	uM	uM	FARAGE	GCB-DLBCL
1	Acalabrutinib	Adavosertib	0.037037	0.00037037	-0.584314	uM	uM	FARAGE	GCB-DLBCL
1	Acalabrutinib	Adavosertib	0.0123457	0.00037037	-2.78454	uM	uM	FARAGE	GCB-DLBCL
1	Acalabrutinib	Adavosertib	0.00411523	0.00037037	1.59462	uM	uM	FARAGE	GCB-DLBCL
1	Acalabrutinib	Adavosertib	0	0.00037037	-2.23715	uM	uM	FARAGE	GCB-DLBCL
1	Acalabrutinib	Adavosertib	1	0.000123457	17.9653	uM	uM	FARAGE	GCB-DLBCL
1	Acalabrutinib	Adavosertib	0.333333	0.000123457	5.10476	uM	uM	FARAGE	GCB-DLBCL
1	Acalabrutinib	Adavosertib	0.111111	0.000123457	0.604193	uM	uM	FARAGE	GCB-DLBCL
1	Acalabrutinib	Adavosertib	0.037037	0.000123457	-4.62055	uM	uM	FARAGE	GCB-DLBCL
1	Acalabrutinib	Adavosertib	0.0123457	0.000123457	-7.36178	uM	uM	FARAGE	GCB-DLBCL
1	Acalabrutinib	Adavosertib	0.00411523	0.000123457	-2.83779	uM	uM	FARAGE	GCB-DLBCL
1	Acalabrutinib	Adavosertib	0	0.000123457	-3.09338	uM	uM	FARAGE	GCB-DLBCL
1	Acalabrutinib	Adavosertib	1	4.12e-05	11.7097	uM	uM	FARAGE	GCB-DLBCL
1	Acalabrutinib	Adavosertib	0.333333	4.12e-05	-0.0411789	uM	uM	FARAGE	GCB-DLBCL
1	Acalabrutinib	Adavosertib	0.111111	4.12e-05	-11.4491	uM	uM	FARAGE	GCB-DLBCL
1	Acalabrutinib	Adavosertib	0.037037	4.12e-05	-13.7963	uM	uM	FARAGE	GCB-DLBCL
1	Acalabrutinib	Adavosertib	0.0123457	4.12e-05	-12.0519	uM	uM	FARAGE	GCB-DLBCL
1	Acalabrutinib	Adavosertib	0.00411523	4.12e-05	-8.61206	uM	uM	FARAGE	GCB-DLBCL
1	Acalabrutinib	Adavosertib	0	4.12e-05	-8.16051	uM	uM	FARAGE	GCB-DLBCL
1	Acalabrutinib	Adavosertib	1	0	-1.51723	uM	uM	FARAGE	GCB-DLBCL
1	Acalabrutinib	Adavosertib	0.333333	0	-8.85061	uM	uM	FARAGE	GCB-DLBCL
1	Acalabrutinib	Adavosertib	0.111111	0	-14.8336	uM	uM	FARAGE	GCB-DLBCL
1	Acalabrutinib	Adavosertib	0.037037	0	-18.1457	uM	uM	FARAGE	GCB-DLBCL
1	Acalabrutinib	Adavosertib	0.0123457	0	-48.4505	uM	uM	FARAGE	GCB-DLBCL
1	Acalabrutinib	Adavosertib	0.00411523	0	-20.8635	uM	uM	FARAGE	GCB-DLBCL
1	Acalabrutinib	Adavosertib	0	0	-4.3607	uM	uM	FARAGE	GCB-DLBCL
2	Acalabrutinib	AZD2461	1	10	43.0709	uM	uM	FARAGE	GCB-DLBCL
2	Acalabrutinib	AZD2461	0.333333	10	44.055	uM	uM	FARAGE	GCB-DLBCL
2	Acalabrutinib	AZD2461	0.111111	10	48.9709	uM	uM	FARAGE	GCB-DLBCL
2	Acalabrutinib	AZD2461	0.037037	10	38.3063	uM	uM	FARAGE	GCB-DLBCL
2	Acalabrutinib	AZD2461	0.0123457	10	10.0292	uM	uM	FARAGE	GCB-DLBCL
2	Acalabrutinib	AZD2461	0.00411523	10	20.8578	uM	uM	FARAGE	GCB-DLBCL
2	Acalabrutinib	AZD2461	0	10	22.4787	uM	uM	FARAGE	GCB-DLBCL
2	Acalabrutinib	AZD2461	1	3.33333	48.1509	uM	uM	FARAGE	GCB-DLBCL
2	Acalabrutinib	AZD2461	0.333333	3.33333	37.9293	uM	uM	FARAGE	GCB-DLBCL
2	Acalabrutinib	AZD2461	0.111111	3.33333	27.5629	uM	uM	FARAGE	GCB-DLBCL
2	Acalabrutinib	AZD2461	0.037037	3.33333	20.091	uM	uM	FARAGE	GCB-DLBCL
2	Acalabrutinib	AZD2461	0.0123457	3.33333	30.6214	uM	uM	FARAGE	GCB-DLBCL
2	Acalabrutinib	AZD2461	0.00411523	3.33333	22.3594	uM	uM	FARAGE	GCB-DLBCL
2	Acalabrutinib	AZD2461	0	3.33333	10.5255	uM	uM	FARAGE	GCB-DLBCL
2	Acalabrutinib	AZD2461	1	1.11111	29.4478	uM	uM	FARAGE	GCB-DLBCL
2	Acalabrutinib	AZD2461	0.333333	1.11111	23.5287	uM	uM	FARAGE	GCB-DLBCL
2	Acalabrutinib	AZD2461	0.111111	1.11111	19.9909	uM	uM	FARAGE	GCB-DLBCL
2	Acalabrutinib	AZD2461	0.037037	1.11111	-1.08698	uM	uM	FARAGE	GCB-DLBCL
2	Acalabrutinib	AZD2461	0.0123457	1.11111	11.1091	uM	uM	FARAGE	GCB-DLBCL
2	Acalabrutinib	AZD2461	0.00411523	1.11111	1.35393	uM	uM	FARAGE	GCB-DLBCL
2	Acalabrutinib	AZD2461	0	1.11111	7.39444	uM	uM	FARAGE	GCB-DLBCL
2	Acalabrutinib	AZD2461	1	0.37037	12.2912	uM	uM	FARAGE	GCB-DLBCL
2	Acalabrutinib	AZD2461	0.333333	0.37037	16.1613	uM	uM	FARAGE	GCB-DLBCL
2	Acalabrutinib	AZD2461	0.111111	0.37037	19.4478	uM	uM	FARAGE	GCB-DLBCL
2	Acalabrutinib	AZD2461	0.037037	0.37037	-4.33088	uM	uM	FARAGE	GCB-DLBCL
2	Acalabrutinib	AZD2461	0.0123457	0.37037	8.551	uM	uM	FARAGE	GCB-DLBCL
2	Acalabrutinib	AZD2461	0.00411523	0.37037	-3.65782	uM	uM	FARAGE	GCB-DLBCL
2	Acalabrutinib	AZD2461	0	0.37037	15.9163	uM	uM	FARAGE	GCB-DLBCL
2	Acalabrutinib	AZD2461	1	0.123457	3.06214	uM	uM	FARAGE	GCB-DLBCL
2	Acalabrutinib	AZD2461	0.333333	0.123457	-6.68446	uM	uM	FARAGE	GCB-DLBCL
2	Acalabrutinib	AZD2461	0.111111	0.123457	4.51902	uM	uM	FARAGE	GCB-DLBCL
2	Acalabrutinib	AZD2461	0.037037	0.123457	-7.99012	uM	uM	FARAGE	GCB-DLBCL
2	Acalabrutinib	AZD2461	0.0123457	0.123457	1.29642	uM	uM	FARAGE	GCB-DLBCL
2	Acalabrutinib	AZD2461	0.00411523	0.123457	-7.12536	uM	uM	FARAGE	GCB-DLBCL
2	Acalabrutinib	AZD2461	0	0.123457	8.0888	uM	uM	FARAGE	GCB-DLBCL
2	Acalabrutinib	AZD2461	1	0.0411523	1.06426	uM	uM	FARAGE	GCB-DLBCL
2	Acalabrutinib	AZD2461	0.333333	0.0411523	-17.6451	uM	uM	FARAGE	GCB-DLBCL
2	Acalabrutinib	AZD2461	0.111111	0.0411523	-7.54283	uM	uM	FARAGE	GCB-DLBCL
2	Acalabrutinib	AZD2461	0.037037	0.0411523	-0.0646082	uM	uM	FARAGE	GCB-DLBCL
2	Acalabrutinib	AZD2461	0.0123457	0.0411523	-3.82182	uM	uM	FARAGE	GCB-DLBCL
2	Acalabrutinib	AZD2461	0.00411523	0.0411523	-9.09769	uM	uM	FARAGE	GCB-DLBCL
2	Acalabrutinib	AZD2461	0	0.0411523	4.04618	uM	uM	FARAGE	GCB-DLBCL
2	Acalabrutinib	AZD2461	1	0	-2.57155	uM	uM	FARAGE	GCB-DLBCL
2	Acalabrutinib	AZD2461	0.333333	0	-25.2022	uM	uM	FARAGE	GCB-DLBCL
2	Acalabrutinib	AZD2461	0.111111	0	-17.2468	uM	uM	FARAGE	GCB-DLBCL
2	Acalabrutinib	AZD2461	0.037037	0	-0.424568	uM	uM	FARAGE	GCB-DLBCL
2	Acalabrutinib	AZD2461	0.0123457	0	-1.42777	uM	uM	FARAGE	GCB-DLBCL
2	Acalabrutinib	AZD2461	0.00411523	0	-3.32129	uM	uM	FARAGE	GCB-DLBCL
2	Acalabrutinib	AZD2461	0	0	-1.6152	uM	uM	FARAGE	GCB-DLBCL
3	Acalabrutinib	AZD3463	1	10	86.0106	uM	uM	FARAGE	GCB-DLBCL
3	Acalabrutinib	AZD3463	0.333333	10	70.3874	uM	uM	FARAGE	GCB-DLBCL
3	Acalabrutinib	AZD3463	0.111111	10	58.4938	uM	uM	FARAGE	GCB-DLBCL
3	Acalabrutinib	AZD3463	0.037037	10	59.1967	uM	uM	FARAGE	GCB-DLBCL
3	Acalabrutinib	AZD3463	0.0123457	10	66.3448	uM	uM	FARAGE	GCB-DLBCL
3	Acalabrutinib	AZD3463	0.00411523	10	76.5856	uM	uM	FARAGE	GCB-DLBCL
3	Acalabrutinib	AZD3463	0	10	68.741	uM	uM	FARAGE	GCB-DLBCL
3	Acalabrutinib	AZD3463	1	3.33333	75.6676	uM	uM	FARAGE	GCB-DLBCL
3	Acalabrutinib	AZD3463	0.333333	3.33333	71.478	uM	uM	FARAGE	GCB-DLBCL
3	Acalabrutinib	AZD3463	0.111111	3.33333	64.9518	uM	uM	FARAGE	GCB-DLBCL
3	Acalabrutinib	AZD3463	0.037037	3.33333	56.1893	uM	uM	FARAGE	GCB-DLBCL
3	Acalabrutinib	AZD3463	0.0123457	3.33333	67.4119	uM	uM	FARAGE	GCB-DLBCL
3	Acalabrutinib	AZD3463	0.00411523	3.33333	53.267	uM	uM	FARAGE	GCB-DLBCL
3	Acalabrutinib	AZD3463	0	3.33333	48.0976	uM	uM	FARAGE	GCB-DLBCL
3	Acalabrutinib	AZD3463	1	1.11111	45.727	uM	uM	FARAGE	GCB-DLBCL
3	Acalabrutinib	AZD3463	0.333333	1.11111	41.629	uM	uM	FARAGE	GCB-DLBCL
3	Acalabrutinib	AZD3463	0.111111	1.11111	24.3999	uM	uM	FARAGE	GCB-DLBCL
3	Acalabrutinib	AZD3463	0.037037	1.11111	12.5617	uM	uM	FARAGE	GCB-DLBCL
3	Acalabrutinib	AZD3463	0.0123457	1.11111	30.5512	uM	uM	FARAGE	GCB-DLBCL
3	Acalabrutinib	AZD3463	0.00411523	1.11111	15.0111	uM	uM	FARAGE	GCB-DLBCL
3	Acalabrutinib	AZD3463	0	1.11111	18.0846	uM	uM	FARAGE	GCB-DLBCL
3	Acalabrutinib	AZD3463	1	0.37037	1.88003	uM	uM	FARAGE	GCB-DLBCL
3	Acalabrutinib	AZD3463	0.333333	0.37037	8.96847	uM	uM	FARAGE	GCB-DLBCL
3	Acalabrutinib	AZD3463	0.111111	0.37037	7.89711	uM	uM	FARAGE	GCB-DLBCL
3	Acalabrutinib	AZD3463	0.037037	0.37037	-4.81651	uM	uM	FARAGE	GCB-DLBCL
3	Acalabrutinib	AZD3463	0.0123457	0.37037	2.30176	uM	uM	FARAGE	GCB-DLBCL
3	Acalabrutinib	AZD3463	0.00411523	0.37037	-1.19987	uM	uM	FARAGE	GCB-DLBCL
3	Acalabrutinib	AZD3463	0	0.37037	0.35499	uM	uM	FARAGE	GCB-DLBCL
3	Acalabrutinib	AZD3463	1	0.123457	-6.16902	uM	uM	FARAGE	GCB-DLBCL
3	Acalabrutinib	AZD3463	0.333333	0.123457	1.78205	uM	uM	FARAGE	GCB-DLBCL
3	Acalabrutinib	AZD3463	0.111111	0.123457	2.2123	uM	uM	FARAGE	GCB-DLBCL
3	Acalabrutinib	AZD3463	0.037037	0.123457	-3.38093	uM	uM	FARAGE	GCB-DLBCL
3	Acalabrutinib	AZD3463	0.0123457	0.123457	-1.85802	uM	uM	FARAGE	GCB-DLBCL
3	Acalabrutinib	AZD3463	0.00411523	0.123457	-1.92405	uM	uM	FARAGE	GCB-DLBCL
3	Acalabrutinib	AZD3463	0	0.123457	1.72028	uM	uM	FARAGE	GCB-DLBCL
3	Acalabrutinib	AZD3463	1	0.0411523	-1.00604	uM	uM	FARAGE	GCB-DLBCL
3	Acalabrutinib	AZD3463	0.333333	0.0411523	-2.08592	uM	uM	FARAGE	GCB-DLBCL
3	Acalabrutinib	AZD3463	0.111111	0.0411523	3.6351	uM	uM	FARAGE	GCB-DLBCL
3	Acalabrutinib	AZD3463	0.037037	0.0411523	-1.25312	uM	uM	FARAGE	GCB-DLBCL
3	Acalabrutinib	AZD3463	0.0123457	0.0411523	-4.32662	uM	uM	FARAGE	GCB-DLBCL
3	Acalabrutinib	AZD3463	0.00411523	0.0411523	4.20805	uM	uM	FARAGE	GCB-DLBCL
3	Acalabrutinib	AZD3463	0	0.0411523	-3.16367	uM	uM	FARAGE	GCB-DLBCL
3	Acalabrutinib	AZD3463	1	0	12.9025	uM	uM	FARAGE	GCB-DLBCL
3	Acalabrutinib	AZD3463	0.333333	0	-2.08379	uM	uM	FARAGE	GCB-DLBCL
3	Acalabrutinib	AZD3463	0.111111	0	0.0908775	uM	uM	FARAGE	GCB-DLBCL
3	Acalabrutinib	AZD3463	0.037037	0	-7.36178	uM	uM	FARAGE	GCB-DLBCL
3	Acalabrutinib	AZD3463	0.0123457	0	-26.3161	uM	uM	FARAGE	GCB-DLBCL
3	Acalabrutinib	AZD3463	0.00411523	0	-14.0583	uM	uM	FARAGE	GCB-DLBCL
3	Acalabrutinib	AZD3463	0	0	1.86086	uM	uM	FARAGE	GCB-DLBCL
4	Acalabrutinib	AZD4573	1	0.01	93.8786	uM	uM	FARAGE	GCB-DLBCL
4	Acalabrutinib	AZD4573	0.333333	0.01	82.1873	uM	uM	FARAGE	GCB-DLBCL
4	Acalabrutinib	AZD4573	0.111111	0.01	92.0191	uM	uM	FARAGE	GCB-DLBCL
4	Acalabrutinib	AZD4573	0.037037	0.01	90.5793	uM	uM	FARAGE	GCB-DLBCL
4	Acalabrutinib	AZD4573	0.0123457	0.01	70.6175	uM	uM	FARAGE	GCB-DLBCL
4	Acalabrutinib	AZD4573	0.00411523	0.01	63.2457	uM	uM	FARAGE	GCB-DLBCL
4	Acalabrutinib	AZD4573	0	0.01	59.693	uM	uM	FARAGE	GCB-DLBCL
4	Acalabrutinib	AZD4573	1	0.00333333	68.9029	uM	uM	FARAGE	GCB-DLBCL
4	Acalabrutinib	AZD4573	0.333333	0.00333333	67.6888	uM	uM	FARAGE	GCB-DLBCL
4	Acalabrutinib	AZD4573	0.111111	0.00333333	54.5939	uM	uM	FARAGE	GCB-DLBCL
4	Acalabrutinib	AZD4573	0.037037	0.00333333	49.2201	uM	uM	FARAGE	GCB-DLBCL
4	Acalabrutinib	AZD4573	0.0123457	0.00333333	41.8526	uM	uM	FARAGE	GCB-DLBCL
4	Acalabrutinib	AZD4573	0.00411523	0.00333333	48.0806	uM	uM	FARAGE	GCB-DLBCL
4	Acalabrutinib	AZD4573	0	0.00333333	54.3937	uM	uM	FARAGE	GCB-DLBCL
4	Acalabrutinib	AZD4573	1	0.00111111	34.3701	uM	uM	FARAGE	GCB-DLBCL
4	Acalabrutinib	AZD4573	0.333333	0.00111111	30.3978	uM	uM	FARAGE	GCB-DLBCL
4	Acalabrutinib	AZD4573	0.111111	0.00111111	18.3381	uM	uM	FARAGE	GCB-DLBCL
4	Acalabrutinib	AZD4573	0.037037	0.00111111	11.6053	uM	uM	FARAGE	GCB-DLBCL
4	Acalabrutinib	AZD4573	0.0123457	0.00111111	22.779	uM	uM	FARAGE	GCB-DLBCL
4	Acalabrutinib	AZD4573	0.00411523	0.00111111	-4.29041	uM	uM	FARAGE	GCB-DLBCL
4	Acalabrutinib	AZD4573	0	0.00111111	-15.9923	uM	uM	FARAGE	GCB-DLBCL
4	Acalabrutinib	AZD4573	1	0.00037037	12.4871	uM	uM	FARAGE	GCB-DLBCL
4	Acalabrutinib	AZD4573	0.333333	0.00037037	19.4648	uM	uM	FARAGE	GCB-DLBCL
4	Acalabrutinib	AZD4573	0.111111	0.00037037	8.0888	uM	uM	FARAGE	GCB-DLBCL
4	Acalabrutinib	AZD4573	0.037037	0.00037037	13.763	uM	uM	FARAGE	GCB-DLBCL
4	Acalabrutinib	AZD4573	0.0123457	0.00037037	4.81935	uM	uM	FARAGE	GCB-DLBCL
4	Acalabrutinib	AZD4573	0.00411523	0.00037037	2.15479	uM	uM	FARAGE	GCB-DLBCL
4	Acalabrutinib	AZD4573	0	0.00037037	2.76182	uM	uM	FARAGE	GCB-DLBCL
4	Acalabrutinib	AZD4573	1	0.000123457	16.468	uM	uM	FARAGE	GCB-DLBCL
4	Acalabrutinib	AZD4573	0.333333	0.000123457	3.56481	uM	uM	FARAGE	GCB-DLBCL
4	Acalabrutinib	AZD4573	0.111111	0.000123457	7.48603	uM	uM	FARAGE	GCB-DLBCL
4	Acalabrutinib	AZD4573	0.037037	0.000123457	3.5499	uM	uM	FARAGE	GCB-DLBCL
4	Acalabrutinib	AZD4573	0.0123457	0.000123457	2.732	uM	uM	FARAGE	GCB-DLBCL
4	Acalabrutinib	AZD4573	0.00411523	0.000123457	-2.45653	uM	uM	FARAGE	GCB-DLBCL
4	Acalabrutinib	AZD4573	0	0.000123457	-2.00285	uM	uM	FARAGE	GCB-DLBCL
4	Acalabrutinib	AZD4573	1	4.12e-05	7.4413	uM	uM	FARAGE	GCB-DLBCL
4	Acalabrutinib	AZD4573	0.333333	4.12e-05	9.9312	uM	uM	FARAGE	GCB-DLBCL
4	Acalabrutinib	AZD4573	0.111111	4.12e-05	10.9493	uM	uM	FARAGE	GCB-DLBCL
4	Acalabrutinib	AZD4573	0.037037	4.12e-05	18.2209	uM	uM	FARAGE	GCB-DLBCL
4	Acalabrutinib	AZD4573	0.0123457	4.12e-05	2.15053	uM	uM	FARAGE	GCB-DLBCL
4	Acalabrutinib	AZD4573	0.00411523	4.12e-05	2.33583	uM	uM	FARAGE	GCB-DLBCL
4	Acalabrutinib	AZD4573	0	4.12e-05	2.66598	uM	uM	FARAGE	GCB-DLBCL
4	Acalabrutinib	AZD4573	1	0	2.10154	uM	uM	FARAGE	GCB-DLBCL
4	Acalabrutinib	AZD4573	0.333333	0	9.44132	uM	uM	FARAGE	GCB-DLBCL
4	Acalabrutinib	AZD4573	0.111111	0	4.31881	uM	uM	FARAGE	GCB-DLBCL
4	Acalabrutinib	AZD4573	0.037037	0	2.32306	uM	uM	FARAGE	GCB-DLBCL
4	Acalabrutinib	AZD4573	0.0123457	0	1.83104	uM	uM	FARAGE	GCB-DLBCL
4	Acalabrutinib	AZD4573	0.00411523	0	-2.7249	uM	uM	FARAGE	GCB-DLBCL
4	Acalabrutinib	AZD4573	0	0	-1.41925	uM	uM	FARAGE	GCB-DLBCL
5	Acalabrutinib	AZD7648	1	10	70.2682	uM	uM	FARAGE	GCB-DLBCL
5	Acalabrutinib	AZD7648	0.333333	10	66.1084	uM	uM	FARAGE	GCB-DLBCL
5	Acalabrutinib	AZD7648	0.111111	10	48.104	uM	uM	FARAGE	GCB-DLBCL
5	Acalabrutinib	AZD7648	0.037037	10	55.874	uM	uM	FARAGE	GCB-DLBCL
5	Acalabrutinib	AZD7648	0.0123457	10	44.4724	uM	uM	FARAGE	GCB-DLBCL
5	Acalabrutinib	AZD7648	0.00411523	10	53.563	uM	uM	FARAGE	GCB-DLBCL
5	Acalabrutinib	AZD7648	0	10	51.7888	uM	uM	FARAGE	GCB-DLBCL
5	Acalabrutinib	AZD7648	1	3.33333	60.1211	uM	uM	FARAGE	GCB-DLBCL
5	Acalabrutinib	AZD7648	0.333333	3.33333	51.4075	uM	uM	FARAGE	GCB-DLBCL
5	Acalabrutinib	AZD7648	0.111111	3.33333	45.1583	uM	uM	FARAGE	GCB-DLBCL
5	Acalabrutinib	AZD7648	0.037037	3.33333	43.5289	uM	uM	FARAGE	GCB-DLBCL
5	Acalabrutinib	AZD7648	0.0123457	3.33333	33.2349	uM	uM	FARAGE	GCB-DLBCL
5	Acalabrutinib	AZD7648	0.00411523	3.33333	29.6246	uM	uM	FARAGE	GCB-DLBCL
5	Acalabrutinib	AZD7648	0	3.33333	23.7013	uM	uM	FARAGE	GCB-DLBCL
5	Acalabrutinib	AZD7648	1	1.11111	35.548	uM	uM	FARAGE	GCB-DLBCL
5	Acalabrutinib	AZD7648	0.333333	1.11111	30.7982	uM	uM	FARAGE	GCB-DLBCL
5	Acalabrutinib	AZD7648	0.111111	1.11111	26.2423	uM	uM	FARAGE	GCB-DLBCL
5	Acalabrutinib	AZD7648	0.037037	1.11111	11.8716	uM	uM	FARAGE	GCB-DLBCL
5	Acalabrutinib	AZD7648	0.0123457	1.11111	12.6447	uM	uM	FARAGE	GCB-DLBCL
5	Acalabrutinib	AZD7648	0.00411523	1.11111	-5.99223	uM	uM	FARAGE	GCB-DLBCL
5	Acalabrutinib	AZD7648	0	1.11111	-2.44162	uM	uM	FARAGE	GCB-DLBCL
5	Acalabrutinib	AZD7648	1	0.37037	27.4691	uM	uM	FARAGE	GCB-DLBCL
5	Acalabrutinib	AZD7648	0.333333	0.37037	15.648	uM	uM	FARAGE	GCB-DLBCL
5	Acalabrutinib	AZD7648	0.111111	0.37037	5.3071	uM	uM	FARAGE	GCB-DLBCL
5	Acalabrutinib	AZD7648	0.037037	0.37037	0.785238	uM	uM	FARAGE	GCB-DLBCL
5	Acalabrutinib	AZD7648	0.0123457	0.37037	-3.1232	uM	uM	FARAGE	GCB-DLBCL
5	Acalabrutinib	AZD7648	0.00411523	0.37037	10.436	uM	uM	FARAGE	GCB-DLBCL
5	Acalabrutinib	AZD7648	0	0.37037	-2.72916	uM	uM	FARAGE	GCB-DLBCL
5	Acalabrutinib	AZD7648	1	0.123457	5.46046	uM	uM	FARAGE	GCB-DLBCL
5	Acalabrutinib	AZD7648	0.333333	0.123457	8.48284	uM	uM	FARAGE	GCB-DLBCL
5	Acalabrutinib	AZD7648	0.111111	0.123457	9.20276	uM	uM	FARAGE	GCB-DLBCL
5	Acalabrutinib	AZD7648	0.037037	0.123457	-3.36389	uM	uM	FARAGE	GCB-DLBCL
5	Acalabrutinib	AZD7648	0.0123457	0.123457	1.29216	uM	uM	FARAGE	GCB-DLBCL
5	Acalabrutinib	AZD7648	0.00411523	0.123457	-5.39159	uM	uM	FARAGE	GCB-DLBCL
5	Acalabrutinib	AZD7648	0	0.123457	1.60101	uM	uM	FARAGE	GCB-DLBCL
5	Acalabrutinib	AZD7648	1	0.0411523	2.2975	uM	uM	FARAGE	GCB-DLBCL
5	Acalabrutinib	AZD7648	0.333333	0.0411523	6.64683	uM	uM	FARAGE	GCB-DLBCL
5	Acalabrutinib	AZD7648	0.111111	0.0411523	-2.92086	uM	uM	FARAGE	GCB-DLBCL
5	Acalabrutinib	AZD7648	0.037037	0.0411523	-1.2595	uM	uM	FARAGE	GCB-DLBCL
5	Acalabrutinib	AZD7648	0.0123457	0.0411523	-3.63013	uM	uM	FARAGE	GCB-DLBCL
5	Acalabrutinib	AZD7648	0.00411523	0.0411523	0.0802278	uM	uM	FARAGE	GCB-DLBCL
5	Acalabrutinib	AZD7648	0	0.0411523	3.9695	uM	uM	FARAGE	GCB-DLBCL
5	Acalabrutinib	AZD7648	1	0	7.51372	uM	uM	FARAGE	GCB-DLBCL
5	Acalabrutinib	AZD7648	0.333333	0	0.431668	uM	uM	FARAGE	GCB-DLBCL
5	Acalabrutinib	AZD7648	0.111111	0	-0.905935	uM	uM	FARAGE	GCB-DLBCL
5	Acalabrutinib	AZD7648	0.037037	0	12.1421	uM	uM	FARAGE	GCB-DLBCL
5	Acalabrutinib	AZD7648	0.0123457	0	-6.32663	uM	uM	FARAGE	GCB-DLBCL
5	Acalabrutinib	AZD7648	0.00411523	0	0.127086	uM	uM	FARAGE	GCB-DLBCL
5	Acalabrutinib	AZD7648	0	0	-4.79947	uM	uM	FARAGE	GCB-DLBCL
6	Acalabrutinib	AZD8055	1	0.01	46.3638	uM	uM	FARAGE	GCB-DLBCL
6	Acalabrutinib	AZD8055	0.333333	0.01	23.5011	uM	uM	FARAGE	GCB-DLBCL
6	Acalabrutinib	AZD8055	0.111111	0.01	34.4596	uM	uM	FARAGE	GCB-DLBCL
6	Acalabrutinib	AZD8055	0.037037	0.01	14.5276	uM	uM	FARAGE	GCB-DLBCL
6	Acalabrutinib	AZD8055	0.0123457	0.01	13.6096	uM	uM	FARAGE	GCB-DLBCL
6	Acalabrutinib	AZD8055	0.00411523	0.01	4.31242	uM	uM	FARAGE	GCB-DLBCL
6	Acalabrutinib	AZD8055	0	0.01	19.5862	uM	uM	FARAGE	GCB-DLBCL
6	Acalabrutinib	AZD8055	1	0.00333333	21.7843	uM	uM	FARAGE	GCB-DLBCL
6	Acalabrutinib	AZD8055	0.333333	0.00333333	5.88432	uM	uM	FARAGE	GCB-DLBCL
6	Acalabrutinib	AZD8055	0.111111	0.00333333	-4.2542	uM	uM	FARAGE	GCB-DLBCL
6	Acalabrutinib	AZD8055	0.037037	0.00333333	-8.73347	uM	uM	FARAGE	GCB-DLBCL
6	Acalabrutinib	AZD8055	0.0123457	0.00333333	-6.13494	uM	uM	FARAGE	GCB-DLBCL
6	Acalabrutinib	AZD8055	0.00411523	0.00333333	-9.78566	uM	uM	FARAGE	GCB-DLBCL
6	Acalabrutinib	AZD8055	0	0.00333333	-3.251	uM	uM	FARAGE	GCB-DLBCL
6	Acalabrutinib	AZD8055	1	0.00111111	5.50093	uM	uM	FARAGE	GCB-DLBCL
6	Acalabrutinib	AZD8055	0.333333	0.00111111	5.99294	uM	uM	FARAGE	GCB-DLBCL
6	Acalabrutinib	AZD8055	0.111111	0.00111111	-13.5407	uM	uM	FARAGE	GCB-DLBCL
6	Acalabrutinib	AZD8055	0.037037	0.00111111	-12.9039	uM	uM	FARAGE	GCB-DLBCL
6	Acalabrutinib	AZD8055	0.0123457	0.00111111	-24.4716	uM	uM	FARAGE	GCB-DLBCL
6	Acalabrutinib	AZD8055	0.00411523	0.00111111	-21.3661	uM	uM	FARAGE	GCB-DLBCL
6	Acalabrutinib	AZD8055	0	0.00111111	-5.72173	uM	uM	FARAGE	GCB-DLBCL
6	Acalabrutinib	AZD8055	1	0.00037037	-3.95388	uM	uM	FARAGE	GCB-DLBCL
6	Acalabrutinib	AZD8055	0.333333	0.00037037	-2.16899	uM	uM	FARAGE	GCB-DLBCL
6	Acalabrutinib	AZD8055	0.111111	0.00037037	-27.3065	uM	uM	FARAGE	GCB-DLBCL
6	Acalabrutinib	AZD8055	0.037037	0.00037037	-7.0998	uM	uM	FARAGE	GCB-DLBCL
6	Acalabrutinib	AZD8055	0.0123457	0.00037037	-20.6995	uM	uM	FARAGE	GCB-DLBCL
6	Acalabrutinib	AZD8055	0.00411523	0.00037037	-6.12855	uM	uM	FARAGE	GCB-DLBCL
6	Acalabrutinib	AZD8055	0	0.00037037	-4.22225	uM	uM	FARAGE	GCB-DLBCL
6	Acalabrutinib	AZD8055	1	0.000123457	-2.52682	uM	uM	FARAGE	GCB-DLBCL
6	Acalabrutinib	AZD8055	0.333333	0.000123457	-5.51726	uM	uM	FARAGE	GCB-DLBCL
6	Acalabrutinib	AZD8055	0.111111	0.000123457	-28.0243	uM	uM	FARAGE	GCB-DLBCL
6	Acalabrutinib	AZD8055	0.037037	0.000123457	-11.6259	uM	uM	FARAGE	GCB-DLBCL
6	Acalabrutinib	AZD8055	0.0123457	0.000123457	-17.8219	uM	uM	FARAGE	GCB-DLBCL
6	Acalabrutinib	AZD8055	0.00411523	0.000123457	-1.743	uM	uM	FARAGE	GCB-DLBCL
6	Acalabrutinib	AZD8055	0	0.000123457	6.99188	uM	uM	FARAGE	GCB-DLBCL
6	Acalabrutinib	AZD8055	1	4.12e-05	3.92051	uM	uM	FARAGE	GCB-DLBCL
6	Acalabrutinib	AZD8055	0.333333	4.12e-05	10.9706	uM	uM	FARAGE	GCB-DLBCL
6	Acalabrutinib	AZD8055	0.111111	4.12e-05	-0.678031	uM	uM	FARAGE	GCB-DLBCL
6	Acalabrutinib	AZD8055	0.037037	4.12e-05	-1.85376	uM	uM	FARAGE	GCB-DLBCL
6	Acalabrutinib	AZD8055	0.0123457	4.12e-05	-42.6187	uM	uM	FARAGE	GCB-DLBCL
6	Acalabrutinib	AZD8055	0.00411523	4.12e-05	-4.53961	uM	uM	FARAGE	GCB-DLBCL
6	Acalabrutinib	AZD8055	0	4.12e-05	-3.25313	uM	uM	FARAGE	GCB-DLBCL
6	Acalabrutinib	AZD8055	1	0	4.3039	uM	uM	FARAGE	GCB-DLBCL
6	Acalabrutinib	AZD8055	0.333333	0	-0.584314	uM	uM	FARAGE	GCB-DLBCL
6	Acalabrutinib	AZD8055	0.111111	0	0.201634	uM	uM	FARAGE	GCB-DLBCL
6	Acalabrutinib	AZD8055	0.037037	0	6.54673	uM	uM	FARAGE	GCB-DLBCL
6	Acalabrutinib	AZD8055	0.0123457	0	6.74055	uM	uM	FARAGE	GCB-DLBCL
6	Acalabrutinib	AZD8055	0.00411523	0	5.15375	uM	uM	FARAGE	GCB-DLBCL
6	Acalabrutinib	AZD8055	0	0	-1.35109	uM	uM	FARAGE	GCB-DLBCL
7	Acalabrutinib	Capivasertib	1	10	86.3535	uM	uM	FARAGE	GCB-DLBCL
7	Acalabrutinib	Capivasertib	0.333333	10	76.0446	uM	uM	FARAGE	GCB-DLBCL
7	Acalabrutinib	Capivasertib	0.111111	10	89.7529	uM	uM	FARAGE	GCB-DLBCL
7	Acalabrutinib	Capivasertib	0.037037	10	91.0521	uM	uM	FARAGE	GCB-DLBCL
7	Acalabrutinib	Capivasertib	0.0123457	10	91.9936	uM	uM	FARAGE	GCB-DLBCL
7	Acalabrutinib	Capivasertib	0.00411523	10	91.0968	uM	uM	FARAGE	GCB-DLBCL
7	Acalabrutinib	Capivasertib	0	10	90.6623	uM	uM	FARAGE	GCB-DLBCL
7	Acalabrutinib	Capivasertib	1	3.33333	82.5238	uM	uM	FARAGE	GCB-DLBCL
7	Acalabrutinib	Capivasertib	0.333333	3.33333	81.904	uM	uM	FARAGE	GCB-DLBCL
7	Acalabrutinib	Capivasertib	0.111111	3.33333	89.4163	uM	uM	FARAGE	GCB-DLBCL
7	Acalabrutinib	Capivasertib	0.037037	3.33333	87.2182	uM	uM	FARAGE	GCB-DLBCL
7	Acalabrutinib	Capivasertib	0.0123457	3.33333	86.7007	uM	uM	FARAGE	GCB-DLBCL
7	Acalabrutinib	Capivasertib	0.00411523	3.33333	88.0297	uM	uM	FARAGE	GCB-DLBCL
7	Acalabrutinib	Capivasertib	0	3.33333	88.7901	uM	uM	FARAGE	GCB-DLBCL
7	Acalabrutinib	Capivasertib	1	1.11111	88.1298	uM	uM	FARAGE	GCB-DLBCL
7	Acalabrutinib	Capivasertib	0.333333	1.11111	81.527	uM	uM	FARAGE	GCB-DLBCL
7	Acalabrutinib	Capivasertib	0.111111	1.11111	81.6697	uM	uM	FARAGE	GCB-DLBCL
7	Acalabrutinib	Capivasertib	0.037037	1.11111	79.6271	uM	uM	FARAGE	GCB-DLBCL
7	Acalabrutinib	Capivasertib	0.0123457	1.11111	80.8241	uM	uM	FARAGE	GCB-DLBCL
7	Acalabrutinib	Capivasertib	0.00411523	1.11111	85.0499	uM	uM	FARAGE	GCB-DLBCL
7	Acalabrutinib	Capivasertib	0	1.11111	80.1191	uM	uM	FARAGE	GCB-DLBCL
7	Acalabrutinib	Capivasertib	1	0.37037	83.8252	uM	uM	FARAGE	GCB-DLBCL
7	Acalabrutinib	Capivasertib	0.333333	0.37037	81.461	uM	uM	FARAGE	GCB-DLBCL
7	Acalabrutinib	Capivasertib	0.111111	0.37037	63.4225	uM	uM	FARAGE	GCB-DLBCL
7	Acalabrutinib	Capivasertib	0.037037	0.37037	44.2424	uM	uM	FARAGE	GCB-DLBCL
7	Acalabrutinib	Capivasertib	0.0123457	0.37037	50.7984	uM	uM	FARAGE	GCB-DLBCL
7	Acalabrutinib	Capivasertib	0.00411523	0.37037	66.7942	uM	uM	FARAGE	GCB-DLBCL
7	Acalabrutinib	Capivasertib	0	0.37037	67.0157	uM	uM	FARAGE	GCB-DLBCL
7	Acalabrutinib	Capivasertib	1	0.123457	70.7857	uM	uM	FARAGE	GCB-DLBCL
7	Acalabrutinib	Capivasertib	0.333333	0.123457	63.9508	uM	uM	FARAGE	GCB-DLBCL
7	Acalabrutinib	Capivasertib	0.111111	0.123457	58.7367	uM	uM	FARAGE	GCB-DLBCL
7	Acalabrutinib	Capivasertib	0.037037	0.123457	47.3926	uM	uM	FARAGE	GCB-DLBCL
7	Acalabrutinib	Capivasertib	0.0123457	0.123457	33.9655	uM	uM	FARAGE	GCB-DLBCL
7	Acalabrutinib	Capivasertib	0.00411523	0.123457	30.1465	uM	uM	FARAGE	GCB-DLBCL
7	Acalabrutinib	Capivasertib	0	0.123457	37.8909	uM	uM	FARAGE	GCB-DLBCL
7	Acalabrutinib	Capivasertib	1	0.0411523	51.9549	uM	uM	FARAGE	GCB-DLBCL
7	Acalabrutinib	Capivasertib	0.333333	0.0411523	44.7749	uM	uM	FARAGE	GCB-DLBCL
7	Acalabrutinib	Capivasertib	0.111111	0.0411523	45.1753	uM	uM	FARAGE	GCB-DLBCL
7	Acalabrutinib	Capivasertib	0.037037	0.0411523	17.2433	uM	uM	FARAGE	GCB-DLBCL
7	Acalabrutinib	Capivasertib	0.0123457	0.0411523	-6.6227	uM	uM	FARAGE	GCB-DLBCL
7	Acalabrutinib	Capivasertib	0.00411523	0.0411523	1.28151	uM	uM	FARAGE	GCB-DLBCL
7	Acalabrutinib	Capivasertib	0	0.0411523	-3.06995	uM	uM	FARAGE	GCB-DLBCL
7	Acalabrutinib	Capivasertib	1	0	9.92907	uM	uM	FARAGE	GCB-DLBCL
7	Acalabrutinib	Capivasertib	0.333333	0	6.58294	uM	uM	FARAGE	GCB-DLBCL
7	Acalabrutinib	Capivasertib	0.111111	0	-6.98053	uM	uM	FARAGE	GCB-DLBCL
7	Acalabrutinib	Capivasertib	0.037037	0	-48.4185	uM	uM	FARAGE	GCB-DLBCL
7	Acalabrutinib	Capivasertib	0.0123457	0	-40.7742	uM	uM	FARAGE	GCB-DLBCL
7	Acalabrutinib	Capivasertib	0.00411523	0	-11.0232	uM	uM	FARAGE	GCB-DLBCL
7	Acalabrutinib	Capivasertib	0	0	-5.71321	uM	uM	FARAGE	GCB-DLBCL
8	Acalabrutinib	Daporinad	1	0.01	91.7593	uM	uM	FARAGE	GCB-DLBCL
8	Acalabrutinib	Daporinad	0.333333	0.01	89.9296	uM	uM	FARAGE	GCB-DLBCL
8	Acalabrutinib	Daporinad	0.111111	0.01	81.4802	uM	uM	FARAGE	GCB-DLBCL
8	Acalabrutinib	Daporinad	0.037037	0.01	77.5589	uM	uM	FARAGE	GCB-DLBCL
8	Acalabrutinib	Daporinad	0.0123457	0.01	69.184	uM	uM	FARAGE	GCB-DLBCL
8	Acalabrutinib	Daporinad	0.00411523	0.01	70.6707	uM	uM	FARAGE	GCB-DLBCL
8	Acalabrutinib	Daporinad	0	0.01	90.149	uM	uM	FARAGE	GCB-DLBCL
8	Acalabrutinib	Daporinad	1	0.00333333	77.0414	uM	uM	FARAGE	GCB-DLBCL
8	Acalabrutinib	Daporinad	0.333333	0.00333333	54.9092	uM	uM	FARAGE	GCB-DLBCL
8	Acalabrutinib	Daporinad	0.111111	0.00333333	66.8837	uM	uM	FARAGE	GCB-DLBCL
8	Acalabrutinib	Daporinad	0.037037	0.00333333	82.3811	uM	uM	FARAGE	GCB-DLBCL
8	Acalabrutinib	Daporinad	0.0123457	0.00333333	16.8152	uM	uM	FARAGE	GCB-DLBCL
8	Acalabrutinib	Daporinad	0.00411523	0.00333333	16.4786	uM	uM	FARAGE	GCB-DLBCL
8	Acalabrutinib	Daporinad	0	0.00333333	41.056	uM	uM	FARAGE	GCB-DLBCL
8	Acalabrutinib	Daporinad	1	0.00111111	16.0037	uM	uM	FARAGE	GCB-DLBCL
8	Acalabrutinib	Daporinad	0.333333	0.00111111	9.59893	uM	uM	FARAGE	GCB-DLBCL
8	Acalabrutinib	Daporinad	0.111111	0.00111111	8.60425	uM	uM	FARAGE	GCB-DLBCL
8	Acalabrutinib	Daporinad	0.037037	0.00111111	3.6138	uM	uM	FARAGE	GCB-DLBCL
8	Acalabrutinib	Daporinad	0.0123457	0.00111111	-6.16263	uM	uM	FARAGE	GCB-DLBCL
8	Acalabrutinib	Daporinad	0.00411523	0.00111111	-1.21478	uM	uM	FARAGE	GCB-DLBCL
8	Acalabrutinib	Daporinad	0	0.00111111	-4.65037	uM	uM	FARAGE	GCB-DLBCL
8	Acalabrutinib	Daporinad	1	0.00037037	1.25383	uM	uM	FARAGE	GCB-DLBCL
8	Acalabrutinib	Daporinad	0.333333	0.00037037	-0.541715	uM	uM	FARAGE	GCB-DLBCL
8	Acalabrutinib	Daporinad	0.111111	0.00037037	4.96418	uM	uM	FARAGE	GCB-DLBCL
8	Acalabrutinib	Daporinad	0.037037	0.00037037	-11.8986	uM	uM	FARAGE	GCB-DLBCL
8	Acalabrutinib	Daporinad	0.0123457	0.00037037	-6.71641	uM	uM	FARAGE	GCB-DLBCL
8	Acalabrutinib	Daporinad	0.00411523	0.00037037	-11.1446	uM	uM	FARAGE	GCB-DLBCL
8	Acalabrutinib	Daporinad	0	0.00037037	-0.484206	uM	uM	FARAGE	GCB-DLBCL
8	Acalabrutinib	Daporinad	1	0.000123457	10.7853	uM	uM	FARAGE	GCB-DLBCL
8	Acalabrutinib	Daporinad	0.333333	0.000123457	-8.03485	uM	uM	FARAGE	GCB-DLBCL
8	Acalabrutinib	Daporinad	0.111111	0.000123457	-2.72277	uM	uM	FARAGE	GCB-DLBCL
8	Acalabrutinib	Daporinad	0.037037	0.000123457	-20.8763	uM	uM	FARAGE	GCB-DLBCL
8	Acalabrutinib	Daporinad	0.0123457	0.000123457	-5.90917	uM	uM	FARAGE	GCB-DLBCL
8	Acalabrutinib	Daporinad	0.00411523	0.000123457	1.19845	uM	uM	FARAGE	GCB-DLBCL
8	Acalabrutinib	Daporinad	0	0.000123457	4.54245	uM	uM	FARAGE	GCB-DLBCL
8	Acalabrutinib	Daporinad	1	4.12e-05	-6.19032	uM	uM	FARAGE	GCB-DLBCL
8	Acalabrutinib	Daporinad	0.333333	4.12e-05	-13.1254	uM	uM	FARAGE	GCB-DLBCL
8	Acalabrutinib	Daporinad	0.111111	4.12e-05	-5.94324	uM	uM	FARAGE	GCB-DLBCL
8	Acalabrutinib	Daporinad	0.037037	4.12e-05	-34.1181	uM	uM	FARAGE	GCB-DLBCL
8	Acalabrutinib	Daporinad	0.0123457	4.12e-05	-14.7442	uM	uM	FARAGE	GCB-DLBCL
8	Acalabrutinib	Daporinad	0.00411523	4.12e-05	0.608453	uM	uM	FARAGE	GCB-DLBCL
8	Acalabrutinib	Daporinad	0	4.12e-05	-4.59712	uM	uM	FARAGE	GCB-DLBCL
8	Acalabrutinib	Daporinad	1	0	-6.06891	uM	uM	FARAGE	GCB-DLBCL
8	Acalabrutinib	Daporinad	0.333333	0	-9.35115	uM	uM	FARAGE	GCB-DLBCL
8	Acalabrutinib	Daporinad	0.111111	0	-3.54919	uM	uM	FARAGE	GCB-DLBCL
8	Acalabrutinib	Daporinad	0.037037	0	-4.91448	uM	uM	FARAGE	GCB-DLBCL
8	Acalabrutinib	Daporinad	0.0123457	0	-23.1297	uM	uM	FARAGE	GCB-DLBCL
8	Acalabrutinib	Daporinad	0.00411523	0	-16.1031	uM	uM	FARAGE	GCB-DLBCL
8	Acalabrutinib	Daporinad	0	0	1.66916	uM	uM	FARAGE	GCB-DLBCL
9	Acalabrutinib	Doxorubicin HCl	1	0.01	57.12	uM	uM	FARAGE	GCB-DLBCL
9	Acalabrutinib	Doxorubicin HCl	0.333333	0.01	57.874	uM	uM	FARAGE	GCB-DLBCL
9	Acalabrutinib	Doxorubicin HCl	0.111111	0.01	60.251	uM	uM	FARAGE	GCB-DLBCL
9	Acalabrutinib	Doxorubicin HCl	0.037037	0.01	28.0676	uM	uM	FARAGE	GCB-DLBCL
9	Acalabrutinib	Doxorubicin HCl	0.0123457	0.01	34.99	uM	uM	FARAGE	GCB-DLBCL
9	Acalabrutinib	Doxorubicin HCl	0.00411523	0.01	43.1263	uM	uM	FARAGE	GCB-DLBCL
9	Acalabrutinib	Doxorubicin HCl	0	0.01	46.2467	uM	uM	FARAGE	GCB-DLBCL
9	Acalabrutinib	Doxorubicin HCl	1	0.00333333	52.2361	uM	uM	FARAGE	GCB-DLBCL
9	Acalabrutinib	Doxorubicin HCl	0.333333	0.00333333	78.6324	uM	uM	FARAGE	GCB-DLBCL
9	Acalabrutinib	Doxorubicin HCl	0.111111	0.00333333	55.7271	uM	uM	FARAGE	GCB-DLBCL
9	Acalabrutinib	Doxorubicin HCl	0.037037	0.00333333	23.0261	uM	uM	FARAGE	GCB-DLBCL
9	Acalabrutinib	Doxorubicin HCl	0.0123457	0.00333333	23.5373	uM	uM	FARAGE	GCB-DLBCL
9	Acalabrutinib	Doxorubicin HCl	0.00411523	0.00333333	29.1731	uM	uM	FARAGE	GCB-DLBCL
9	Acalabrutinib	Doxorubicin HCl	0	0.00333333	-2.80797	uM	uM	FARAGE	GCB-DLBCL
9	Acalabrutinib	Doxorubicin HCl	1	0.00111111	42.2594	uM	uM	FARAGE	GCB-DLBCL
9	Acalabrutinib	Doxorubicin HCl	0.333333	0.00111111	53.6653	uM	uM	FARAGE	GCB-DLBCL
9	Acalabrutinib	Doxorubicin HCl	0.111111	0.00111111	13.2518	uM	uM	FARAGE	GCB-DLBCL
9	Acalabrutinib	Doxorubicin HCl	0.037037	0.00111111	15.6054	uM	uM	FARAGE	GCB-DLBCL
9	Acalabrutinib	Doxorubicin HCl	0.0123457	0.00111111	20.6192	uM	uM	FARAGE	GCB-DLBCL
9	Acalabrutinib	Doxorubicin HCl	0.00411523	0.00111111	-3.04014	uM	uM	FARAGE	GCB-DLBCL
9	Acalabrutinib	Doxorubicin HCl	0	0.00111111	-2.90169	uM	uM	FARAGE	GCB-DLBCL
9	Acalabrutinib	Doxorubicin HCl	1	0.00037037	33.1241	uM	uM	FARAGE	GCB-DLBCL
9	Acalabrutinib	Doxorubicin HCl	0.333333	0.00037037	35.7418	uM	uM	FARAGE	GCB-DLBCL
9	Acalabrutinib	Doxorubicin HCl	0.111111	0.00037037	8.7214	uM	uM	FARAGE	GCB-DLBCL
9	Acalabrutinib	Doxorubicin HCl	0.037037	0.00037037	-4.9656	uM	uM	FARAGE	GCB-DLBCL
9	Acalabrutinib	Doxorubicin HCl	0.0123457	0.00037037	9.69265	uM	uM	FARAGE	GCB-DLBCL
9	Acalabrutinib	Doxorubicin HCl	0.00411523	0.00037037	0.320911	uM	uM	FARAGE	GCB-DLBCL
9	Acalabrutinib	Doxorubicin HCl	0	0.00037037	2.22295	uM	uM	FARAGE	GCB-DLBCL
9	Acalabrutinib	Doxorubicin HCl	1	0.000123457	13.9206	uM	uM	FARAGE	GCB-DLBCL
9	Acalabrutinib	Doxorubicin HCl	0.333333	0.000123457	10.5872	uM	uM	FARAGE	GCB-DLBCL
9	Acalabrutinib	Doxorubicin HCl	0.111111	0.000123457	2.19952	uM	uM	FARAGE	GCB-DLBCL
9	Acalabrutinib	Doxorubicin HCl	0.037037	0.000123457	3.38803	uM	uM	FARAGE	GCB-DLBCL
9	Acalabrutinib	Doxorubicin HCl	0.0123457	0.000123457	1.21123	uM	uM	FARAGE	GCB-DLBCL
9	Acalabrutinib	Doxorubicin HCl	0.00411523	0.000123457	-1.03586	uM	uM	FARAGE	GCB-DLBCL
9	Acalabrutinib	Doxorubicin HCl	0	0.000123457	3.01955	uM	uM	FARAGE	GCB-DLBCL
9	Acalabrutinib	Doxorubicin HCl	1	4.12e-05	17.4435	uM	uM	FARAGE	GCB-DLBCL
9	Acalabrutinib	Doxorubicin HCl	0.333333	4.12e-05	12.698	uM	uM	FARAGE	GCB-DLBCL
9	Acalabrutinib	Doxorubicin HCl	0.111111	4.12e-05	-0.162585	uM	uM	FARAGE	GCB-DLBCL
9	Acalabrutinib	Doxorubicin HCl	0.037037	4.12e-05	-6.24144	uM	uM	FARAGE	GCB-DLBCL
9	Acalabrutinib	Doxorubicin HCl	0.0123457	4.12e-05	2.69153	uM	uM	FARAGE	GCB-DLBCL
9	Acalabrutinib	Doxorubicin HCl	0.00411523	4.12e-05	4.77462	uM	uM	FARAGE	GCB-DLBCL
9	Acalabrutinib	Doxorubicin HCl	0	4.12e-05	3.75225	uM	uM	FARAGE	GCB-DLBCL
9	Acalabrutinib	Doxorubicin HCl	1	0	1.43487	uM	uM	FARAGE	GCB-DLBCL
9	Acalabrutinib	Doxorubicin HCl	0.333333	0	4.32307	uM	uM	FARAGE	GCB-DLBCL
9	Acalabrutinib	Doxorubicin HCl	0.111111	0	-2.13704	uM	uM	FARAGE	GCB-DLBCL
9	Acalabrutinib	Doxorubicin HCl	0.037037	0	6.62341	uM	uM	FARAGE	GCB-DLBCL
9	Acalabrutinib	Doxorubicin HCl	0.0123457	0	6.07814	uM	uM	FARAGE	GCB-DLBCL
9	Acalabrutinib	Doxorubicin HCl	0.00411523	0	6.8577	uM	uM	FARAGE	GCB-DLBCL
9	Acalabrutinib	Doxorubicin HCl	0	0	5.63937	uM	uM	FARAGE	GCB-DLBCL
10	Acalabrutinib	Fexagratinib	1	10	69.0839	uM	uM	FARAGE	GCB-DLBCL
10	Acalabrutinib	Fexagratinib	0.333333	10	44.645	uM	uM	FARAGE	GCB-DLBCL
10	Acalabrutinib	Fexagratinib	0.111111	10	22.6043	uM	uM	FARAGE	GCB-DLBCL
10	Acalabrutinib	Fexagratinib	0.037037	10	3.52434	uM	uM	FARAGE	GCB-DLBCL
10	Acalabrutinib	Fexagratinib	0.0123457	10	0.674481	uM	uM	FARAGE	GCB-DLBCL
10	Acalabrutinib	Fexagratinib	0.00411523	10	52.5726	uM	uM	FARAGE	GCB-DLBCL
10	Acalabrutinib	Fexagratinib	0	10	47.4629	uM	uM	FARAGE	GCB-DLBCL
10	Acalabrutinib	Fexagratinib	1	3.33333	53.972	uM	uM	FARAGE	GCB-DLBCL
10	Acalabrutinib	Fexagratinib	0.333333	3.33333	49.5587	uM	uM	FARAGE	GCB-DLBCL
10	Acalabrutinib	Fexagratinib	0.111111	3.33333	29.4074	uM	uM	FARAGE	GCB-DLBCL
10	Acalabrutinib	Fexagratinib	0.037037	3.33333	32.7727	uM	uM	FARAGE	GCB-DLBCL
10	Acalabrutinib	Fexagratinib	0.0123457	3.33333	-12.0583	uM	uM	FARAGE	GCB-DLBCL
10	Acalabrutinib	Fexagratinib	0.00411523	3.33333	-16.4779	uM	uM	FARAGE	GCB-DLBCL
10	Acalabrutinib	Fexagratinib	0	3.33333	-3.70894	uM	uM	FARAGE	GCB-DLBCL
10	Acalabrutinib	Fexagratinib	1	1.11111	2.05894	uM	uM	FARAGE	GCB-DLBCL
10	Acalabrutinib	Fexagratinib	0.333333	1.11111	16.0015	uM	uM	FARAGE	GCB-DLBCL
10	Acalabrutinib	Fexagratinib	0.111111	1.11111	1.12603	uM	uM	FARAGE	GCB-DLBCL
10	Acalabrutinib	Fexagratinib	0.037037	1.11111	-3.46399	uM	uM	FARAGE	GCB-DLBCL
10	Acalabrutinib	Fexagratinib	0.0123457	1.11111	-5.18925	uM	uM	FARAGE	GCB-DLBCL
10	Acalabrutinib	Fexagratinib	0.00411523	1.11111	-15.824	uM	uM	FARAGE	GCB-DLBCL
10	Acalabrutinib	Fexagratinib	0	1.11111	1.1452	uM	uM	FARAGE	GCB-DLBCL
10	Acalabrutinib	Fexagratinib	1	0.37037	13.4009	uM	uM	FARAGE	GCB-DLBCL
10	Acalabrutinib	Fexagratinib	0.333333	0.37037	8.16761	uM	uM	FARAGE	GCB-DLBCL
10	Acalabrutinib	Fexagratinib	0.111111	0.37037	-2.30531	uM	uM	FARAGE	GCB-DLBCL
10	Acalabrutinib	Fexagratinib	0.037037	0.37037	-10.6973	uM	uM	FARAGE	GCB-DLBCL
10	Acalabrutinib	Fexagratinib	0.0123457	0.37037	-4.64824	uM	uM	FARAGE	GCB-DLBCL
10	Acalabrutinib	Fexagratinib	0.00411523	0.37037	1.82252	uM	uM	FARAGE	GCB-DLBCL
10	Acalabrutinib	Fexagratinib	0	0.37037	3.13243	uM	uM	FARAGE	GCB-DLBCL
10	Acalabrutinib	Fexagratinib	1	0.123457	12.1272	uM	uM	FARAGE	GCB-DLBCL
10	Acalabrutinib	Fexagratinib	0.333333	0.123457	9.31352	uM	uM	FARAGE	GCB-DLBCL
10	Acalabrutinib	Fexagratinib	0.111111	0.123457	-1.6152	uM	uM	FARAGE	GCB-DLBCL
10	Acalabrutinib	Fexagratinib	0.037037	0.123457	-3.98157	uM	uM	FARAGE	GCB-DLBCL
10	Acalabrutinib	Fexagratinib	0.0123457	0.123457	-17.1744	uM	uM	FARAGE	GCB-DLBCL
10	Acalabrutinib	Fexagratinib	0.00411523	0.123457	1.57971	uM	uM	FARAGE	GCB-DLBCL
10	Acalabrutinib	Fexagratinib	0	0.123457	4.63617	uM	uM	FARAGE	GCB-DLBCL
10	Acalabrutinib	Fexagratinib	1	0.0411523	7.82895	uM	uM	FARAGE	GCB-DLBCL
10	Acalabrutinib	Fexagratinib	0.333333	0.0411523	1.21975	uM	uM	FARAGE	GCB-DLBCL
10	Acalabrutinib	Fexagratinib	0.111111	0.0411523	6.27409	uM	uM	FARAGE	GCB-DLBCL
10	Acalabrutinib	Fexagratinib	0.037037	0.0411523	-0.452257	uM	uM	FARAGE	GCB-DLBCL
10	Acalabrutinib	Fexagratinib	0.0123457	0.0411523	-6.88681	uM	uM	FARAGE	GCB-DLBCL
10	Acalabrutinib	Fexagratinib	0.00411523	0.0411523	0.403979	uM	uM	FARAGE	GCB-DLBCL
10	Acalabrutinib	Fexagratinib	0	0.0411523	2.84063	uM	uM	FARAGE	GCB-DLBCL
10	Acalabrutinib	Fexagratinib	1	0	-0.35215	uM	uM	FARAGE	GCB-DLBCL
10	Acalabrutinib	Fexagratinib	0.333333	0	18.6895	uM	uM	FARAGE	GCB-DLBCL
10	Acalabrutinib	Fexagratinib	0.111111	0	-1.63011	uM	uM	FARAGE	GCB-DLBCL
10	Acalabrutinib	Fexagratinib	0.037037	0	3.30496	uM	uM	FARAGE	GCB-DLBCL
10	Acalabrutinib	Fexagratinib	0.0123457	0	-8.45444	uM	uM	FARAGE	GCB-DLBCL
10	Acalabrutinib	Fexagratinib	0.00411523	0	-2.86335	uM	uM	FARAGE	GCB-DLBCL
10	Acalabrutinib	Fexagratinib	0	0	3.24319	uM	uM	FARAGE	GCB-DLBCL
11	Acalabrutinib	Lapatinib	1	10	46.645	uM	uM	FARAGE	GCB-DLBCL
11	Acalabrutinib	Lapatinib	0.333333	10	88.6581	uM	uM	FARAGE	GCB-DLBCL
11	Acalabrutinib	Lapatinib	0.111111	10	77.6548	uM	uM	FARAGE	GCB-DLBCL
11	Acalabrutinib	Lapatinib	0.037037	10	59.7356	uM	uM	FARAGE	GCB-DLBCL
11	Acalabrutinib	Lapatinib	0.0123457	10	57.6802	uM	uM	FARAGE	GCB-DLBCL
11	Acalabrutinib	Lapatinib	0.00411523	10	34.9218	uM	uM	FARAGE	GCB-DLBCL
11	Acalabrutinib	Lapatinib	0	10	14.3466	uM	uM	FARAGE	GCB-DLBCL
11	Acalabrutinib	Lapatinib	1	3.33333	55.3884	uM	uM	FARAGE	GCB-DLBCL
11	Acalabrutinib	Lapatinib	0.333333	3.33333	31.4202	uM	uM	FARAGE	GCB-DLBCL
11	Acalabrutinib	Lapatinib	0.111111	3.33333	16.4723	uM	uM	FARAGE	GCB-DLBCL
11	Acalabrutinib	Lapatinib	0.037037	3.33333	14.3593	uM	uM	FARAGE	GCB-DLBCL
11	Acalabrutinib	Lapatinib	0.0123457	3.33333	2.17822	uM	uM	FARAGE	GCB-DLBCL
11	Acalabrutinib	Lapatinib	0.00411523	3.33333	-1.35961	uM	uM	FARAGE	GCB-DLBCL
11	Acalabrutinib	Lapatinib	0	3.33333	-5.10192	uM	uM	FARAGE	GCB-DLBCL
11	Acalabrutinib	Lapatinib	1	1.11111	-8.49491	uM	uM	FARAGE	GCB-DLBCL
11	Acalabrutinib	Lapatinib	0.333333	1.11111	21.7268	uM	uM	FARAGE	GCB-DLBCL
11	Acalabrutinib	Lapatinib	0.111111	1.11111	-3.6493	uM	uM	FARAGE	GCB-DLBCL
11	Acalabrutinib	Lapatinib	0.037037	1.11111	2.2762	uM	uM	FARAGE	GCB-DLBCL
11	Acalabrutinib	Lapatinib	0.0123457	1.11111	-0.833517	uM	uM	FARAGE	GCB-DLBCL
11	Acalabrutinib	Lapatinib	0.00411523	1.11111	-1.22756	uM	uM	FARAGE	GCB-DLBCL
11	Acalabrutinib	Lapatinib	0	1.11111	-0.428828	uM	uM	FARAGE	GCB-DLBCL
11	Acalabrutinib	Lapatinib	1	0.37037	10.2592	uM	uM	FARAGE	GCB-DLBCL
11	Acalabrutinib	Lapatinib	0.333333	0.37037	13.6671	uM	uM	FARAGE	GCB-DLBCL
11	Acalabrutinib	Lapatinib	0.111111	0.37037	12.6043	uM	uM	FARAGE	GCB-DLBCL
11	Acalabrutinib	Lapatinib	0.037037	0.37037	2.44446	uM	uM	FARAGE	GCB-DLBCL
11	Acalabrutinib	Lapatinib	0.0123457	0.37037	-12.0136	uM	uM	FARAGE	GCB-DLBCL
11	Acalabrutinib	Lapatinib	0.00411523	0.37037	-1.66206	uM	uM	FARAGE	GCB-DLBCL
11	Acalabrutinib	Lapatinib	0	0.37037	8.66176	uM	uM	FARAGE	GCB-DLBCL
11	Acalabrutinib	Lapatinib	1	0.123457	8.81937	uM	uM	FARAGE	GCB-DLBCL
11	Acalabrutinib	Lapatinib	0.333333	0.123457	5.90136	uM	uM	FARAGE	GCB-DLBCL
11	Acalabrutinib	Lapatinib	0.111111	0.123457	-0.36067	uM	uM	FARAGE	GCB-DLBCL
11	Acalabrutinib	Lapatinib	0.037037	0.123457	-6.07317	uM	uM	FARAGE	GCB-DLBCL
11	Acalabrutinib	Lapatinib	0.0123457	0.123457	-4.03908	uM	uM	FARAGE	GCB-DLBCL
11	Acalabrutinib	Lapatinib	0.00411523	0.123457	-5.06145	uM	uM	FARAGE	GCB-DLBCL
11	Acalabrutinib	Lapatinib	0	0.123457	-6.85273	uM	uM	FARAGE	GCB-DLBCL
11	Acalabrutinib	Lapatinib	1	0.0411523	2.11645	uM	uM	FARAGE	GCB-DLBCL
11	Acalabrutinib	Lapatinib	0.333333	0.0411523	-6.55454	uM	uM	FARAGE	GCB-DLBCL
11	Acalabrutinib	Lapatinib	0.111111	0.0411523	3.10261	uM	uM	FARAGE	GCB-DLBCL
11	Acalabrutinib	Lapatinib	0.037037	0.0411523	2.47641	uM	uM	FARAGE	GCB-DLBCL
11	Acalabrutinib	Lapatinib	0.0123457	0.0411523	4.08239	uM	uM	FARAGE	GCB-DLBCL
11	Acalabrutinib	Lapatinib	0.00411523	0.0411523	-1.06568	uM	uM	FARAGE	GCB-DLBCL
11	Acalabrutinib	Lapatinib	0	0.0411523	1.12177	uM	uM	FARAGE	GCB-DLBCL
11	Acalabrutinib	Lapatinib	1	0	4.51902	uM	uM	FARAGE	GCB-DLBCL
11	Acalabrutinib	Lapatinib	0.333333	0	-3.30638	uM	uM	FARAGE	GCB-DLBCL
11	Acalabrutinib	Lapatinib	0.111111	0	13.2475	uM	uM	FARAGE	GCB-DLBCL
11	Acalabrutinib	Lapatinib	0.037037	0	0.932204	uM	uM	FARAGE	GCB-DLBCL
11	Acalabrutinib	Lapatinib	0.0123457	0	0.625493	uM	uM	FARAGE	GCB-DLBCL
11	Acalabrutinib	Lapatinib	0.00411523	0	1.33902	uM	uM	FARAGE	GCB-DLBCL
11	Acalabrutinib	Lapatinib	0	0	-0.245653	uM	uM	FARAGE	GCB-DLBCL
12	Acalabrutinib	Palbociclib HCl	1	10	52.2489	uM	uM	FARAGE	GCB-DLBCL
12	Acalabrutinib	Palbociclib HCl	0.333333	10	59.463	uM	uM	FARAGE	GCB-DLBCL
12	Acalabrutinib	Palbociclib HCl	0.111111	10	96.115	uM	uM	FARAGE	GCB-DLBCL
12	Acalabrutinib	Palbociclib HCl	0.037037	10	90.5984	uM	uM	FARAGE	GCB-DLBCL
12	Acalabrutinib	Palbociclib HCl	0.0123457	10	86.4046	uM	uM	FARAGE	GCB-DLBCL
12	Acalabrutinib	Palbociclib HCl	0.00411523	10	86.6538	uM	uM	FARAGE	GCB-DLBCL
12	Acalabrutinib	Palbociclib HCl	0	10	85.5697	uM	uM	FARAGE	GCB-DLBCL
12	Acalabrutinib	Palbociclib HCl	1	3.33333	36.4362	uM	uM	FARAGE	GCB-DLBCL
12	Acalabrutinib	Palbociclib HCl	0.333333	3.33333	39.5565	uM	uM	FARAGE	GCB-DLBCL
12	Acalabrutinib	Palbociclib HCl	0.111111	3.33333	44.8431	uM	uM	FARAGE	GCB-DLBCL
12	Acalabrutinib	Palbociclib HCl	0.037037	3.33333	25.3861	uM	uM	FARAGE	GCB-DLBCL
12	Acalabrutinib	Palbociclib HCl	0.0123457	3.33333	47.9996	uM	uM	FARAGE	GCB-DLBCL
12	Acalabrutinib	Palbociclib HCl	0.00411523	3.33333	3.89282	uM	uM	FARAGE	GCB-DLBCL
12	Acalabrutinib	Palbociclib HCl	0	3.33333	63.1265	uM	uM	FARAGE	GCB-DLBCL
12	Acalabrutinib	Palbociclib HCl	1	1.11111	11.6671	uM	uM	FARAGE	GCB-DLBCL
12	Acalabrutinib	Palbociclib HCl	0.333333	1.11111	4.42744	uM	uM	FARAGE	GCB-DLBCL
12	Acalabrutinib	Palbociclib HCl	0.111111	1.11111	14.551	uM	uM	FARAGE	GCB-DLBCL
12	Acalabrutinib	Palbociclib HCl	0.037037	1.11111	12.96	uM	uM	FARAGE	GCB-DLBCL
12	Acalabrutinib	Palbociclib HCl	0.0123457	1.11111	10.9301	uM	uM	FARAGE	GCB-DLBCL
12	Acalabrutinib	Palbociclib HCl	0.00411523	1.11111	7.05791	uM	uM	FARAGE	GCB-DLBCL
12	Acalabrutinib	Palbociclib HCl	0	1.11111	28.992	uM	uM	FARAGE	GCB-DLBCL
12	Acalabrutinib	Palbociclib HCl	1	0.37037	-7.57265	uM	uM	FARAGE	GCB-DLBCL
12	Acalabrutinib	Palbociclib HCl	0.333333	0.37037	2.91305	uM	uM	FARAGE	GCB-DLBCL
12	Acalabrutinib	Palbociclib HCl	0.111111	0.37037	-0.377709	uM	uM	FARAGE	GCB-DLBCL
12	Acalabrutinib	Palbociclib HCl	0.037037	0.37037	13.1304	uM	uM	FARAGE	GCB-DLBCL
12	Acalabrutinib	Palbociclib HCl	0.0123457	0.37037	2.17183	uM	uM	FARAGE	GCB-DLBCL
12	Acalabrutinib	Palbociclib HCl	0.00411523	0.37037	19.4542	uM	uM	FARAGE	GCB-DLBCL
12	Acalabrutinib	Palbociclib HCl	0	0.37037	19.501	uM	uM	FARAGE	GCB-DLBCL
12	Acalabrutinib	Palbociclib HCl	1	0.123457	0.823577	uM	uM	FARAGE	GCB-DLBCL
12	Acalabrutinib	Palbociclib HCl	0.333333	0.123457	1.46256	uM	uM	FARAGE	GCB-DLBCL
12	Acalabrutinib	Palbociclib HCl	0.111111	0.123457	2.81507	uM	uM	FARAGE	GCB-DLBCL
12	Acalabrutinib	Palbociclib HCl	0.037037	0.123457	-21.2852	uM	uM	FARAGE	GCB-DLBCL
12	Acalabrutinib	Palbociclib HCl	0.0123457	0.123457	23.4052	uM	uM	FARAGE	GCB-DLBCL
12	Acalabrutinib	Palbociclib HCl	0.00411523	0.123457	6.36994	uM	uM	FARAGE	GCB-DLBCL
12	Acalabrutinib	Palbociclib HCl	0	0.123457	11.7502	uM	uM	FARAGE	GCB-DLBCL
12	Acalabrutinib	Palbociclib HCl	1	0.0411523	7.41361	uM	uM	FARAGE	GCB-DLBCL
12	Acalabrutinib	Palbociclib HCl	0.333333	0.0411523	-7.72813	uM	uM	FARAGE	GCB-DLBCL
12	Acalabrutinib	Palbociclib HCl	0.111111	0.0411523	-1.6791	uM	uM	FARAGE	GCB-DLBCL
12	Acalabrutinib	Palbociclib HCl	0.037037	0.0411523	-23.3725	uM	uM	FARAGE	GCB-DLBCL
12	Acalabrutinib	Palbociclib HCl	0.0123457	0.0411523	4.59144	uM	uM	FARAGE	GCB-DLBCL
12	Acalabrutinib	Palbociclib HCl	0.00411523	0.0411523	-4.10298	uM	uM	FARAGE	GCB-DLBCL
12	Acalabrutinib	Palbociclib HCl	0	0.0411523	-0.258433	uM	uM	FARAGE	GCB-DLBCL
12	Acalabrutinib	Palbociclib HCl	1	0	12.5084	uM	uM	FARAGE	GCB-DLBCL
12	Acalabrutinib	Palbociclib HCl	0.333333	0	13.0856	uM	uM	FARAGE	GCB-DLBCL
12	Acalabrutinib	Palbociclib HCl	0.111111	0	0.291092	uM	uM	FARAGE	GCB-DLBCL
12	Acalabrutinib	Palbociclib HCl	0.037037	0	-4.17965	uM	uM	FARAGE	GCB-DLBCL
12	Acalabrutinib	Palbociclib HCl	0.0123457	0	1.52433	uM	uM	FARAGE	GCB-DLBCL
12	Acalabrutinib	Palbociclib HCl	0.00411523	0	0.787368	uM	uM	FARAGE	GCB-DLBCL
12	Acalabrutinib	Palbociclib HCl	0	0	-2.30318	uM	uM	FARAGE	GCB-DLBCL
7	Acalabrutinib	Capivasertib	1	10	91.574	uM	uM	FARAGE	GCB-DLBCL
7	Acalabrutinib	Capivasertib	0.333333	10	72.1127	uM	uM	FARAGE	GCB-DLBCL
7	Acalabrutinib	Capivasertib	0.111111	10	87.7954	uM	uM	FARAGE	GCB-DLBCL
7	Acalabrutinib	Capivasertib	0.037037	10	89.3716	uM	uM	FARAGE	GCB-DLBCL
7	Acalabrutinib	Capivasertib	0.0123457	10	89.8572	uM	uM	FARAGE	GCB-DLBCL
7	Acalabrutinib	Capivasertib	0.00411523	10	92.7774	uM	uM	FARAGE	GCB-DLBCL
7	Acalabrutinib	Capivasertib	0	10	93.2822	uM	uM	FARAGE	GCB-DLBCL
7	Acalabrutinib	Capivasertib	1	3.33333	91.6059	uM	uM	FARAGE	GCB-DLBCL
7	Acalabrutinib	Capivasertib	0.333333	3.33333	88.4302	uM	uM	FARAGE	GCB-DLBCL
7	Acalabrutinib	Capivasertib	0.111111	3.33333	91.5676	uM	uM	FARAGE	GCB-DLBCL
7	Acalabrutinib	Capivasertib	0.037037	3.33333	87.723	uM	uM	FARAGE	GCB-DLBCL
7	Acalabrutinib	Capivasertib	0.0123457	3.33333	85.5334	uM	uM	FARAGE	GCB-DLBCL
7	Acalabrutinib	Capivasertib	0.00411523	3.33333	88.8263	uM	uM	FARAGE	GCB-DLBCL
7	Acalabrutinib	Capivasertib	0	3.33333	90.1512	uM	uM	FARAGE	GCB-DLBCL
7	Acalabrutinib	Capivasertib	1	1.11111	89.3439	uM	uM	FARAGE	GCB-DLBCL
7	Acalabrutinib	Capivasertib	0.333333	1.11111	87.6037	uM	uM	FARAGE	GCB-DLBCL
7	Acalabrutinib	Capivasertib	0.111111	1.11111	85.7805	uM	uM	FARAGE	GCB-DLBCL
7	Acalabrutinib	Capivasertib	0.037037	1.11111	83.7507	uM	uM	FARAGE	GCB-DLBCL
7	Acalabrutinib	Capivasertib	0.0123457	1.11111	81.8423	uM	uM	FARAGE	GCB-DLBCL
7	Acalabrutinib	Capivasertib	0.00411523	1.11111	85.4142	uM	uM	FARAGE	GCB-DLBCL
7	Acalabrutinib	Capivasertib	0	1.11111	81.2459	uM	uM	FARAGE	GCB-DLBCL
7	Acalabrutinib	Capivasertib	1	0.37037	86.3577	uM	uM	FARAGE	GCB-DLBCL
7	Acalabrutinib	Capivasertib	0.333333	0.37037	78.0744	uM	uM	FARAGE	GCB-DLBCL
7	Acalabrutinib	Capivasertib	0.111111	0.37037	80.264	uM	uM	FARAGE	GCB-DLBCL
7	Acalabrutinib	Capivasertib	0.037037	0.37037	63.0988	uM	uM	FARAGE	GCB-DLBCL
7	Acalabrutinib	Capivasertib	0.0123457	0.37037	55.5737	uM	uM	FARAGE	GCB-DLBCL
7	Acalabrutinib	Capivasertib	0.00411523	0.37037	73.0797	uM	uM	FARAGE	GCB-DLBCL
7	Acalabrutinib	Capivasertib	0	0.37037	71.6505	uM	uM	FARAGE	GCB-DLBCL
7	Acalabrutinib	Capivasertib	1	0.123457	76.0509	uM	uM	FARAGE	GCB-DLBCL
7	Acalabrutinib	Capivasertib	0.333333	0.123457	71.7953	uM	uM	FARAGE	GCB-DLBCL
7	Acalabrutinib	Capivasertib	0.111111	0.123457	69.9338	uM	uM	FARAGE	GCB-DLBCL
7	Acalabrutinib	Capivasertib	0.037037	0.123457	61.4438	uM	uM	FARAGE	GCB-DLBCL
7	Acalabrutinib	Capivasertib	0.0123457	0.123457	20.5383	uM	uM	FARAGE	GCB-DLBCL
7	Acalabrutinib	Capivasertib	0.00411523	0.123457	45.3393	uM	uM	FARAGE	GCB-DLBCL
7	Acalabrutinib	Capivasertib	0	0.123457	48.7089	uM	uM	FARAGE	GCB-DLBCL
7	Acalabrutinib	Capivasertib	1	0.0411523	58.8261	uM	uM	FARAGE	GCB-DLBCL
7	Acalabrutinib	Capivasertib	0.333333	0.0411523	58.6046	uM	uM	FARAGE	GCB-DLBCL
7	Acalabrutinib	Capivasertib	0.111111	0.0411523	42.466	uM	uM	FARAGE	GCB-DLBCL
7	Acalabrutinib	Capivasertib	0.037037	0.0411523	43.597	uM	uM	FARAGE	GCB-DLBCL
7	Acalabrutinib	Capivasertib	0.0123457	0.0411523	19.6054	uM	uM	FARAGE	GCB-DLBCL
7	Acalabrutinib	Capivasertib	0.00411523	0.0411523	8.16974	uM	uM	FARAGE	GCB-DLBCL
7	Acalabrutinib	Capivasertib	0	0.0411523	27.9761	uM	uM	FARAGE	GCB-DLBCL
7	Acalabrutinib	Capivasertib	1	0	28.9814	uM	uM	FARAGE	GCB-DLBCL
7	Acalabrutinib	Capivasertib	0.333333	0	7.08773	uM	uM	FARAGE	GCB-DLBCL
7	Acalabrutinib	Capivasertib	0.111111	0	9.4967	uM	uM	FARAGE	GCB-DLBCL
7	Acalabrutinib	Capivasertib	0.037037	0	7.9248	uM	uM	FARAGE	GCB-DLBCL
7	Acalabrutinib	Capivasertib	0.0123457	0	5.83107	uM	uM	FARAGE	GCB-DLBCL
7	Acalabrutinib	Capivasertib	0.00411523	0	-11.0998	uM	uM	FARAGE	GCB-DLBCL
7	Acalabrutinib	Capivasertib	0	0	8.77252	uM	uM	FARAGE	GCB-DLBCL
8	Acalabrutinib	Daporinad	1	0.01	90.2342	uM	uM	FARAGE	GCB-DLBCL
8	Acalabrutinib	Daporinad	0.333333	0.01	90.8455	uM	uM	FARAGE	GCB-DLBCL
8	Acalabrutinib	Daporinad	0.111111	0.01	78.5558	uM	uM	FARAGE	GCB-DLBCL
8	Acalabrutinib	Daporinad	0.037037	0.01	74.9988	uM	uM	FARAGE	GCB-DLBCL
8	Acalabrutinib	Daporinad	0.0123457	0.01	85.001	uM	uM	FARAGE	GCB-DLBCL
8	Acalabrutinib	Daporinad	0.00411523	0.01	82.4791	uM	uM	FARAGE	GCB-DLBCL
8	Acalabrutinib	Daporinad	0	0.01	92.5111	uM	uM	FARAGE	GCB-DLBCL
8	Acalabrutinib	Daporinad	1	0.00333333	54.5322	uM	uM	FARAGE	GCB-DLBCL
8	Acalabrutinib	Daporinad	0.333333	0.00333333	42.498	uM	uM	FARAGE	GCB-DLBCL
8	Acalabrutinib	Daporinad	0.111111	0.00333333	65.6888	uM	uM	FARAGE	GCB-DLBCL
8	Acalabrutinib	Daporinad	0.037037	0.00333333	80.4983	uM	uM	FARAGE	GCB-DLBCL
8	Acalabrutinib	Daporinad	0.0123457	0.00333333	50.9283	uM	uM	FARAGE	GCB-DLBCL
8	Acalabrutinib	Daporinad	0.00411523	0.00333333	19.5521	uM	uM	FARAGE	GCB-DLBCL
8	Acalabrutinib	Daporinad	0	0.00333333	48.8899	uM	uM	FARAGE	GCB-DLBCL
8	Acalabrutinib	Daporinad	1	0.00111111	14.0441	uM	uM	FARAGE	GCB-DLBCL
8	Acalabrutinib	Daporinad	0.333333	0.00111111	1.60953	uM	uM	FARAGE	GCB-DLBCL
8	Acalabrutinib	Daporinad	0.111111	0.00111111	11.6373	uM	uM	FARAGE	GCB-DLBCL
8	Acalabrutinib	Daporinad	0.037037	0.00111111	22.008	uM	uM	FARAGE	GCB-DLBCL
8	Acalabrutinib	Daporinad	0.0123457	0.00111111	20.4787	uM	uM	FARAGE	GCB-DLBCL
8	Acalabrutinib	Daporinad	0.00411523	0.00111111	4.65321	uM	uM	FARAGE	GCB-DLBCL
8	Acalabrutinib	Daporinad	0	0.00111111	11.158	uM	uM	FARAGE	GCB-DLBCL
8	Acalabrutinib	Daporinad	1	0.00037037	-13.2915	uM	uM	FARAGE	GCB-DLBCL
8	Acalabrutinib	Daporinad	0.333333	0.00037037	-3.31916	uM	uM	FARAGE	GCB-DLBCL
8	Acalabrutinib	Daporinad	0.111111	0.00037037	5.95673	uM	uM	FARAGE	GCB-DLBCL
8	Acalabrutinib	Daporinad	0.037037	0.00037037	3.81827	uM	uM	FARAGE	GCB-DLBCL
8	Acalabrutinib	Daporinad	0.0123457	0.00037037	4.31242	uM	uM	FARAGE	GCB-DLBCL
8	Acalabrutinib	Daporinad	0.00411523	0.00037037	-4.81012	uM	uM	FARAGE	GCB-DLBCL
8	Acalabrutinib	Daporinad	0	0.00037037	7.41574	uM	uM	FARAGE	GCB-DLBCL
8	Acalabrutinib	Daporinad	1	0.000123457	12.4594	uM	uM	FARAGE	GCB-DLBCL
8	Acalabrutinib	Daporinad	0.333333	0.000123457	-1.72809	uM	uM	FARAGE	GCB-DLBCL
8	Acalabrutinib	Daporinad	0.111111	0.000123457	12.3402	uM	uM	FARAGE	GCB-DLBCL
8	Acalabrutinib	Daporinad	0.037037	0.000123457	12.8471	uM	uM	FARAGE	GCB-DLBCL
8	Acalabrutinib	Daporinad	0.0123457	0.000123457	6.5659	uM	uM	FARAGE	GCB-DLBCL
8	Acalabrutinib	Daporinad	0.00411523	0.000123457	11.5244	uM	uM	FARAGE	GCB-DLBCL
8	Acalabrutinib	Daporinad	0	0.000123457	4.33372	uM	uM	FARAGE	GCB-DLBCL
8	Acalabrutinib	Daporinad	1	4.12e-05	-2.0348	uM	uM	FARAGE	GCB-DLBCL
8	Acalabrutinib	Daporinad	0.333333	4.12e-05	-2.31809	uM	uM	FARAGE	GCB-DLBCL
8	Acalabrutinib	Daporinad	0.111111	4.12e-05	-5.48318	uM	uM	FARAGE	GCB-DLBCL
8	Acalabrutinib	Daporinad	0.037037	4.12e-05	6.55951	uM	uM	FARAGE	GCB-DLBCL
8	Acalabrutinib	Daporinad	0.0123457	4.12e-05	-5.59606	uM	uM	FARAGE	GCB-DLBCL
8	Acalabrutinib	Daporinad	0.00411523	4.12e-05	5.47324	uM	uM	FARAGE	GCB-DLBCL
8	Acalabrutinib	Daporinad	0	4.12e-05	7.24322	uM	uM	FARAGE	GCB-DLBCL
8	Acalabrutinib	Daporinad	1	0	4.12498	uM	uM	FARAGE	GCB-DLBCL
8	Acalabrutinib	Daporinad	0.333333	0	4.44448	uM	uM	FARAGE	GCB-DLBCL
8	Acalabrutinib	Daporinad	0.111111	0	5.22829	uM	uM	FARAGE	GCB-DLBCL
8	Acalabrutinib	Daporinad	0.037037	0	11.0601	uM	uM	FARAGE	GCB-DLBCL
8	Acalabrutinib	Daporinad	0.0123457	0	10.6107	uM	uM	FARAGE	GCB-DLBCL
8	Acalabrutinib	Daporinad	0.00411523	0	-0.0496986	uM	uM	FARAGE	GCB-DLBCL
8	Acalabrutinib	Daporinad	0	0	-7.27659	uM	uM	FARAGE	GCB-DLBCL
9	Acalabrutinib	Doxorubicin HCl	1	0.01	48.1253	uM	uM	FARAGE	GCB-DLBCL
9	Acalabrutinib	Doxorubicin HCl	0.333333	0.01	62.8879	uM	uM	FARAGE	GCB-DLBCL
9	Acalabrutinib	Doxorubicin HCl	0.111111	0.01	70.3768	uM	uM	FARAGE	GCB-DLBCL
9	Acalabrutinib	Doxorubicin HCl	0.037037	0.01	33.318	uM	uM	FARAGE	GCB-DLBCL
9	Acalabrutinib	Doxorubicin HCl	0.0123457	0.01	20.5127	uM	uM	FARAGE	GCB-DLBCL
9	Acalabrutinib	Doxorubicin HCl	0.00411523	0.01	34.9111	uM	uM	FARAGE	GCB-DLBCL
9	Acalabrutinib	Doxorubicin HCl	0	0.01	50.7004	uM	uM	FARAGE	GCB-DLBCL
9	Acalabrutinib	Doxorubicin HCl	1	0.00333333	68.3107	uM	uM	FARAGE	GCB-DLBCL
9	Acalabrutinib	Doxorubicin HCl	0.333333	0.00333333	82.4088	uM	uM	FARAGE	GCB-DLBCL
9	Acalabrutinib	Doxorubicin HCl	0.111111	0.00333333	49.0838	uM	uM	FARAGE	GCB-DLBCL
9	Acalabrutinib	Doxorubicin HCl	0.037037	0.00333333	21.9206	uM	uM	FARAGE	GCB-DLBCL
9	Acalabrutinib	Doxorubicin HCl	0.0123457	0.00333333	33.5906	uM	uM	FARAGE	GCB-DLBCL
9	Acalabrutinib	Doxorubicin HCl	0.00411523	0.00333333	23.8376	uM	uM	FARAGE	GCB-DLBCL
9	Acalabrutinib	Doxorubicin HCl	0	0.00333333	19.55	uM	uM	FARAGE	GCB-DLBCL
9	Acalabrutinib	Doxorubicin HCl	1	0.00111111	31.1688	uM	uM	FARAGE	GCB-DLBCL
9	Acalabrutinib	Doxorubicin HCl	0.333333	0.00111111	48.8452	uM	uM	FARAGE	GCB-DLBCL
9	Acalabrutinib	Doxorubicin HCl	0.111111	0.00111111	9.29009	uM	uM	FARAGE	GCB-DLBCL
9	Acalabrutinib	Doxorubicin HCl	0.037037	0.00111111	12.9387	uM	uM	FARAGE	GCB-DLBCL
9	Acalabrutinib	Doxorubicin HCl	0.0123457	0.00111111	18.8067	uM	uM	FARAGE	GCB-DLBCL
9	Acalabrutinib	Doxorubicin HCl	0.00411523	0.00111111	8.35505	uM	uM	FARAGE	GCB-DLBCL
9	Acalabrutinib	Doxorubicin HCl	0	0.00111111	6.95994	uM	uM	FARAGE	GCB-DLBCL
9	Acalabrutinib	Doxorubicin HCl	1	0.00037037	29.5607	uM	uM	FARAGE	GCB-DLBCL
9	Acalabrutinib	Doxorubicin HCl	0.333333	0.00037037	40.8771	uM	uM	FARAGE	GCB-DLBCL
9	Acalabrutinib	Doxorubicin HCl	0.111111	0.00037037	24.0271	uM	uM	FARAGE	GCB-DLBCL
9	Acalabrutinib	Doxorubicin HCl	0.037037	0.00037037	12.7747	uM	uM	FARAGE	GCB-DLBCL
9	Acalabrutinib	Doxorubicin HCl	0.0123457	0.00037037	14.6341	uM	uM	FARAGE	GCB-DLBCL
9	Acalabrutinib	Doxorubicin HCl	0.00411523	0.00037037	7.00892	uM	uM	FARAGE	GCB-DLBCL
9	Acalabrutinib	Doxorubicin HCl	0	0.00037037	4.89176	uM	uM	FARAGE	GCB-DLBCL
9	Acalabrutinib	Doxorubicin HCl	1	0.000123457	20.517	uM	uM	FARAGE	GCB-DLBCL
9	Acalabrutinib	Doxorubicin HCl	0.333333	0.000123457	23.729	uM	uM	FARAGE	GCB-DLBCL
9	Acalabrutinib	Doxorubicin HCl	0.111111	0.000123457	3.56694	uM	uM	FARAGE	GCB-DLBCL
9	Acalabrutinib	Doxorubicin HCl	0.037037	0.000123457	10.9514	uM	uM	FARAGE	GCB-DLBCL
9	Acalabrutinib	Doxorubicin HCl	0.0123457	0.000123457	6.03341	uM	uM	FARAGE	GCB-DLBCL
9	Acalabrutinib	Doxorubicin HCl	0.00411523	0.000123457	7.27091	uM	uM	FARAGE	GCB-DLBCL
9	Acalabrutinib	Doxorubicin HCl	0	0.000123457	3.06853	uM	uM	FARAGE	GCB-DLBCL
9	Acalabrutinib	Doxorubicin HCl	1	4.12e-05	25.1006	uM	uM	FARAGE	GCB-DLBCL
9	Acalabrutinib	Doxorubicin HCl	0.333333	4.12e-05	16.1336	uM	uM	FARAGE	GCB-DLBCL
9	Acalabrutinib	Doxorubicin HCl	0.111111	4.12e-05	2.96843	uM	uM	FARAGE	GCB-DLBCL
9	Acalabrutinib	Doxorubicin HCl	0.037037	4.12e-05	5.51797	uM	uM	FARAGE	GCB-DLBCL
9	Acalabrutinib	Doxorubicin HCl	0.0123457	4.12e-05	-1.04438	uM	uM	FARAGE	GCB-DLBCL
9	Acalabrutinib	Doxorubicin HCl	0.00411523	4.12e-05	0.122827	uM	uM	FARAGE	GCB-DLBCL
9	Acalabrutinib	Doxorubicin HCl	0	4.12e-05	6.36781	uM	uM	FARAGE	GCB-DLBCL
9	Acalabrutinib	Doxorubicin HCl	1	0	43.3798	uM	uM	FARAGE	GCB-DLBCL
9	Acalabrutinib	Doxorubicin HCl	0.333333	0	14.0036	uM	uM	FARAGE	GCB-DLBCL
9	Acalabrutinib	Doxorubicin HCl	0.111111	0	11.3306	uM	uM	FARAGE	GCB-DLBCL
9	Acalabrutinib	Doxorubicin HCl	0.037037	0	4.54245	uM	uM	FARAGE	GCB-DLBCL
9	Acalabrutinib	Doxorubicin HCl	0.0123457	0	-9.57692	uM	uM	FARAGE	GCB-DLBCL
9	Acalabrutinib	Doxorubicin HCl	0.00411523	0	2.42955	uM	uM	FARAGE	GCB-DLBCL
9	Acalabrutinib	Doxorubicin HCl	0	0	3.90134	uM	uM	FARAGE	GCB-DLBCL
10	Acalabrutinib	Fexagratinib	1	10	62.0104	uM	uM	FARAGE	GCB-DLBCL
10	Acalabrutinib	Fexagratinib	0.333333	10	37.9548	uM	uM	FARAGE	GCB-DLBCL
10	Acalabrutinib	Fexagratinib	0.111111	10	31.4926	uM	uM	FARAGE	GCB-DLBCL
10	Acalabrutinib	Fexagratinib	0.037037	10	15.8695	uM	uM	FARAGE	GCB-DLBCL
10	Acalabrutinib	Fexagratinib	0.0123457	10	21.4989	uM	uM	FARAGE	GCB-DLBCL
10	Acalabrutinib	Fexagratinib	0.00411523	10	60.5833	uM	uM	FARAGE	GCB-DLBCL
10	Acalabrutinib	Fexagratinib	0	10	49.1754	uM	uM	FARAGE	GCB-DLBCL
10	Acalabrutinib	Fexagratinib	1	3.33333	43.5204	uM	uM	FARAGE	GCB-DLBCL
10	Acalabrutinib	Fexagratinib	0.333333	3.33333	48.8559	uM	uM	FARAGE	GCB-DLBCL
10	Acalabrutinib	Fexagratinib	0.111111	3.33333	41.3393	uM	uM	FARAGE	GCB-DLBCL
10	Acalabrutinib	Fexagratinib	0.037037	3.33333	28.9218	uM	uM	FARAGE	GCB-DLBCL
10	Acalabrutinib	Fexagratinib	0.0123457	3.33333	-14.0264	uM	uM	FARAGE	GCB-DLBCL
10	Acalabrutinib	Fexagratinib	0.00411523	3.33333	-7.17009	uM	uM	FARAGE	GCB-DLBCL
10	Acalabrutinib	Fexagratinib	0	3.33333	16.3019	uM	uM	FARAGE	GCB-DLBCL
10	Acalabrutinib	Fexagratinib	1	1.11111	24.0719	uM	uM	FARAGE	GCB-DLBCL
10	Acalabrutinib	Fexagratinib	0.333333	1.11111	27.68	uM	uM	FARAGE	GCB-DLBCL
10	Acalabrutinib	Fexagratinib	0.111111	1.11111	6.88539	uM	uM	FARAGE	GCB-DLBCL
10	Acalabrutinib	Fexagratinib	0.037037	1.11111	16.2081	uM	uM	FARAGE	GCB-DLBCL
10	Acalabrutinib	Fexagratinib	0.0123457	1.11111	-4.2968	uM	uM	FARAGE	GCB-DLBCL
10	Acalabrutinib	Fexagratinib	0.00411523	1.11111	6.38698	uM	uM	FARAGE	GCB-DLBCL
10	Acalabrutinib	Fexagratinib	0	1.11111	11.3625	uM	uM	FARAGE	GCB-DLBCL
10	Acalabrutinib	Fexagratinib	1	0.37037	2.90453	uM	uM	FARAGE	GCB-DLBCL
10	Acalabrutinib	Fexagratinib	0.333333	0.37037	2.31241	uM	uM	FARAGE	GCB-DLBCL
10	Acalabrutinib	Fexagratinib	0.111111	0.37037	10.1506	uM	uM	FARAGE	GCB-DLBCL
10	Acalabrutinib	Fexagratinib	0.037037	0.37037	0.755419	uM	uM	FARAGE	GCB-DLBCL
10	Acalabrutinib	Fexagratinib	0.0123457	0.37037	0.906645	uM	uM	FARAGE	GCB-DLBCL
10	Acalabrutinib	Fexagratinib	0.00411523	0.37037	5.08559	uM	uM	FARAGE	GCB-DLBCL
10	Acalabrutinib	Fexagratinib	0	0.37037	1.67342	uM	uM	FARAGE	GCB-DLBCL
10	Acalabrutinib	Fexagratinib	1	0.123457	-2.72916	uM	uM	FARAGE	GCB-DLBCL
10	Acalabrutinib	Fexagratinib	0.333333	0.123457	-1.03373	uM	uM	FARAGE	GCB-DLBCL
10	Acalabrutinib	Fexagratinib	0.111111	0.123457	12.1123	uM	uM	FARAGE	GCB-DLBCL
10	Acalabrutinib	Fexagratinib	0.037037	0.123457	-5.34473	uM	uM	FARAGE	GCB-DLBCL
10	Acalabrutinib	Fexagratinib	0.0123457	0.123457	-7.42142	uM	uM	FARAGE	GCB-DLBCL
10	Acalabrutinib	Fexagratinib	0.00411523	0.123457	-0.590704	uM	uM	FARAGE	GCB-DLBCL
10	Acalabrutinib	Fexagratinib	0	0.123457	3.54138	uM	uM	FARAGE	GCB-DLBCL
10	Acalabrutinib	Fexagratinib	1	0.0411523	21.8908	uM	uM	FARAGE	GCB-DLBCL
10	Acalabrutinib	Fexagratinib	0.333333	0.0411523	4.59144	uM	uM	FARAGE	GCB-DLBCL
10	Acalabrutinib	Fexagratinib	0.111111	0.0411523	-0.130636	uM	uM	FARAGE	GCB-DLBCL
10	Acalabrutinib	Fexagratinib	0.037037	0.0411523	-18.3991	uM	uM	FARAGE	GCB-DLBCL
10	Acalabrutinib	Fexagratinib	0.0123457	0.0411523	-7.71322	uM	uM	FARAGE	GCB-DLBCL
10	Acalabrutinib	Fexagratinib	0.00411523	0.0411523	5.50093	uM	uM	FARAGE	GCB-DLBCL
10	Acalabrutinib	Fexagratinib	0	0.0411523	11.158	uM	uM	FARAGE	GCB-DLBCL
10	Acalabrutinib	Fexagratinib	1	0	21.4009	uM	uM	FARAGE	GCB-DLBCL
10	Acalabrutinib	Fexagratinib	0.333333	0	2.75117	uM	uM	FARAGE	GCB-DLBCL
10	Acalabrutinib	Fexagratinib	0.111111	0	-3.14876	uM	uM	FARAGE	GCB-DLBCL
10	Acalabrutinib	Fexagratinib	0.037037	0	-11.1957	uM	uM	FARAGE	GCB-DLBCL
10	Acalabrutinib	Fexagratinib	0.0123457	0	-6.78031	uM	uM	FARAGE	GCB-DLBCL
10	Acalabrutinib	Fexagratinib	0.00411523	0	2.36778	uM	uM	FARAGE	GCB-DLBCL
10	Acalabrutinib	Fexagratinib	0	0	10.4573	uM	uM	FARAGE	GCB-DLBCL
11	Acalabrutinib	Lapatinib	1	10	45.4671	uM	uM	FARAGE	GCB-DLBCL
11	Acalabrutinib	Lapatinib	0.333333	10	57.7015	uM	uM	FARAGE	GCB-DLBCL
11	Acalabrutinib	Lapatinib	0.111111	10	79.7933	uM	uM	FARAGE	GCB-DLBCL
11	Acalabrutinib	Lapatinib	0.037037	10	47.9869	uM	uM	FARAGE	GCB-DLBCL
11	Acalabrutinib	Lapatinib	0.0123457	10	45.186	uM	uM	FARAGE	GCB-DLBCL
11	Acalabrutinib	Lapatinib	0.00411523	10	21.6757	uM	uM	FARAGE	GCB-DLBCL
11	Acalabrutinib	Lapatinib	0	10	24.2465	uM	uM	FARAGE	GCB-DLBCL
11	Acalabrutinib	Lapatinib	1	3.33333	34.0719	uM	uM	FARAGE	GCB-DLBCL
11	Acalabrutinib	Lapatinib	0.333333	3.33333	36.6343	uM	uM	FARAGE	GCB-DLBCL
11	Acalabrutinib	Lapatinib	0.111111	3.33333	10.2848	uM	uM	FARAGE	GCB-DLBCL
11	Acalabrutinib	Lapatinib	0.037037	3.33333	12.2251	uM	uM	FARAGE	GCB-DLBCL
11	Acalabrutinib	Lapatinib	0.0123457	3.33333	6.13139	uM	uM	FARAGE	GCB-DLBCL
11	Acalabrutinib	Lapatinib	0.00411523	3.33333	-5.46614	uM	uM	FARAGE	GCB-DLBCL
11	Acalabrutinib	Lapatinib	0	3.33333	1.52646	uM	uM	FARAGE	GCB-DLBCL
11	Acalabrutinib	Lapatinib	1	1.11111	0.582894	uM	uM	FARAGE	GCB-DLBCL
11	Acalabrutinib	Lapatinib	0.333333	1.11111	2.21656	uM	uM	FARAGE	GCB-DLBCL
11	Acalabrutinib	Lapatinib	0.111111	1.11111	10.3678	uM	uM	FARAGE	GCB-DLBCL
11	Acalabrutinib	Lapatinib	0.037037	1.11111	-25.8603	uM	uM	FARAGE	GCB-DLBCL
11	Acalabrutinib	Lapatinib	0.0123457	1.11111	11.4733	uM	uM	FARAGE	GCB-DLBCL
11	Acalabrutinib	Lapatinib	0.00411523	1.11111	29.0197	uM	uM	FARAGE	GCB-DLBCL
11	Acalabrutinib	Lapatinib	0	1.11111	7.31351	uM	uM	FARAGE	GCB-DLBCL
11	Acalabrutinib	Lapatinib	1	0.37037	7.59892	uM	uM	FARAGE	GCB-DLBCL
11	Acalabrutinib	Lapatinib	0.333333	0.37037	5.46259	uM	uM	FARAGE	GCB-DLBCL
11	Acalabrutinib	Lapatinib	0.111111	0.37037	9.00468	uM	uM	FARAGE	GCB-DLBCL
11	Acalabrutinib	Lapatinib	0.037037	0.37037	6.70434	uM	uM	FARAGE	GCB-DLBCL
11	Acalabrutinib	Lapatinib	0.0123457	0.37037	0.563724	uM	uM	FARAGE	GCB-DLBCL
11	Acalabrutinib	Lapatinib	0.00411523	0.37037	10.8066	uM	uM	FARAGE	GCB-DLBCL
11	Acalabrutinib	Lapatinib	0	0.37037	14.1655	uM	uM	FARAGE	GCB-DLBCL
11	Acalabrutinib	Lapatinib	1	0.123457	13.927	uM	uM	FARAGE	GCB-DLBCL
11	Acalabrutinib	Lapatinib	0.333333	0.123457	13.4371	uM	uM	FARAGE	GCB-DLBCL
11	Acalabrutinib	Lapatinib	0.111111	0.123457	11.3689	uM	uM	FARAGE	GCB-DLBCL
11	Acalabrutinib	Lapatinib	0.037037	0.123457	22.6469	uM	uM	FARAGE	GCB-DLBCL
11	Acalabrutinib	Lapatinib	0.0123457	0.123457	12.2294	uM	uM	FARAGE	GCB-DLBCL
11	Acalabrutinib	Lapatinib	0.00411523	0.123457	6.34012	uM	uM	FARAGE	GCB-DLBCL
11	Acalabrutinib	Lapatinib	0	0.123457	5.24107	uM	uM	FARAGE	GCB-DLBCL
11	Acalabrutinib	Lapatinib	1	0.0411523	4.87472	uM	uM	FARAGE	GCB-DLBCL
11	Acalabrutinib	Lapatinib	0.333333	0.0411523	21.8014	uM	uM	FARAGE	GCB-DLBCL
11	Acalabrutinib	Lapatinib	0.111111	0.0411523	6.10157	uM	uM	FARAGE	GCB-DLBCL
11	Acalabrutinib	Lapatinib	0.037037	0.0411523	9.83536	uM	uM	FARAGE	GCB-DLBCL
11	Acalabrutinib	Lapatinib	0.0123457	0.0411523	9.10266	uM	uM	FARAGE	GCB-DLBCL
11	Acalabrutinib	Lapatinib	0.00411523	0.0411523	3.55416	uM	uM	FARAGE	GCB-DLBCL
11	Acalabrutinib	Lapatinib	0	0.0411523	7.90563	uM	uM	FARAGE	GCB-DLBCL
11	Acalabrutinib	Lapatinib	1	0	16.5106	uM	uM	FARAGE	GCB-DLBCL
11	Acalabrutinib	Lapatinib	0.333333	0	12.0803	uM	uM	FARAGE	GCB-DLBCL
11	Acalabrutinib	Lapatinib	0.111111	0	28.6363	uM	uM	FARAGE	GCB-DLBCL
11	Acalabrutinib	Lapatinib	0.037037	0	5.38591	uM	uM	FARAGE	GCB-DLBCL
11	Acalabrutinib	Lapatinib	0.0123457	0	12.3529	uM	uM	FARAGE	GCB-DLBCL
11	Acalabrutinib	Lapatinib	0.00411523	0	1.49877	uM	uM	FARAGE	GCB-DLBCL
11	Acalabrutinib	Lapatinib	0	0	6.95781	uM	uM	FARAGE	GCB-DLBCL
12	Acalabrutinib	Palbociclib HCl	1	10	60.8155	uM	uM	FARAGE	GCB-DLBCL
12	Acalabrutinib	Palbociclib HCl	0.333333	10	56.7558	uM	uM	FARAGE	GCB-DLBCL
12	Acalabrutinib	Palbociclib HCl	0.111111	10	86.0915	uM	uM	FARAGE	GCB-DLBCL
12	Acalabrutinib	Palbociclib HCl	0.037037	10	89.2715	uM	uM	FARAGE	GCB-DLBCL
12	Acalabrutinib	Palbociclib HCl	0.0123457	10	90.9179	uM	uM	FARAGE	GCB-DLBCL
12	Acalabrutinib	Palbociclib HCl	0.00411523	10	84.0148	uM	uM	FARAGE	GCB-DLBCL
12	Acalabrutinib	Palbociclib HCl	0	10	88.0191	uM	uM	FARAGE	GCB-DLBCL
12	Acalabrutinib	Palbociclib HCl	1	3.33333	38.4767	uM	uM	FARAGE	GCB-DLBCL
12	Acalabrutinib	Palbociclib HCl	0.333333	3.33333	43.35	uM	uM	FARAGE	GCB-DLBCL
12	Acalabrutinib	Palbociclib HCl	0.111111	3.33333	39.9868	uM	uM	FARAGE	GCB-DLBCL
12	Acalabrutinib	Palbociclib HCl	0.037037	3.33333	48.2595	uM	uM	FARAGE	GCB-DLBCL
12	Acalabrutinib	Palbociclib HCl	0.0123457	3.33333	11.6011	uM	uM	FARAGE	GCB-DLBCL
12	Acalabrutinib	Palbociclib HCl	0.00411523	3.33333	46.366	uM	uM	FARAGE	GCB-DLBCL
12	Acalabrutinib	Palbociclib HCl	0	3.33333	62.8389	uM	uM	FARAGE	GCB-DLBCL
12	Acalabrutinib	Palbociclib HCl	1	1.11111	13.7161	uM	uM	FARAGE	GCB-DLBCL
12	Acalabrutinib	Palbociclib HCl	0.333333	1.11111	-2.39689	uM	uM	FARAGE	GCB-DLBCL
12	Acalabrutinib	Palbociclib HCl	0.111111	1.11111	-4.28828	uM	uM	FARAGE	GCB-DLBCL
12	Acalabrutinib	Palbociclib HCl	0.037037	1.11111	13.8333	uM	uM	FARAGE	GCB-DLBCL
12	Acalabrutinib	Palbociclib HCl	0.0123457	1.11111	5.73735	uM	uM	FARAGE	GCB-DLBCL
12	Acalabrutinib	Palbociclib HCl	0.00411523	1.11111	38.4021	uM	uM	FARAGE	GCB-DLBCL
12	Acalabrutinib	Palbociclib HCl	0	1.11111	42.9495	uM	uM	FARAGE	GCB-DLBCL
12	Acalabrutinib	Palbociclib HCl	1	0.37037	-11.6195	uM	uM	FARAGE	GCB-DLBCL
12	Acalabrutinib	Palbociclib HCl	0.333333	0.37037	-4.88892	uM	uM	FARAGE	GCB-DLBCL
12	Acalabrutinib	Palbociclib HCl	0.111111	0.37037	-30.9807	uM	uM	FARAGE	GCB-DLBCL
12	Acalabrutinib	Palbociclib HCl	0.037037	0.37037	5.71392	uM	uM	FARAGE	GCB-DLBCL
12	Acalabrutinib	Palbociclib HCl	0.0123457	0.37037	2.96204	uM	uM	FARAGE	GCB-DLBCL
12	Acalabrutinib	Palbociclib HCl	0.00411523	0.37037	21.3051	uM	uM	FARAGE	GCB-DLBCL
12	Acalabrutinib	Palbociclib HCl	0	0.37037	28.2061	uM	uM	FARAGE	GCB-DLBCL
12	Acalabrutinib	Palbociclib HCl	1	0.123457	4.31668	uM	uM	FARAGE	GCB-DLBCL
12	Acalabrutinib	Palbociclib HCl	0.333333	0.123457	4.14628	uM	uM	FARAGE	GCB-DLBCL
12	Acalabrutinib	Palbociclib HCl	0.111111	0.123457	14.6213	uM	uM	FARAGE	GCB-DLBCL
12	Acalabrutinib	Palbociclib HCl	0.037037	0.123457	-8.06041	uM	uM	FARAGE	GCB-DLBCL
12	Acalabrutinib	Palbociclib HCl	0.0123457	0.123457	20.9877	uM	uM	FARAGE	GCB-DLBCL
12	Acalabrutinib	Palbociclib HCl	0.00411523	0.123457	20.9515	uM	uM	FARAGE	GCB-DLBCL
12	Acalabrutinib	Palbociclib HCl	0	0.123457	28.4851	uM	uM	FARAGE	GCB-DLBCL
12	Acalabrutinib	Palbociclib HCl	1	0.0411523	16.4126	uM	uM	FARAGE	GCB-DLBCL
12	Acalabrutinib	Palbociclib HCl	0.333333	0.0411523	15.4371	uM	uM	FARAGE	GCB-DLBCL
12	Acalabrutinib	Palbociclib HCl	0.111111	0.0411523	21.8951	uM	uM	FARAGE	GCB-DLBCL
12	Acalabrutinib	Palbociclib HCl	0.037037	0.0411523	-24.2629	uM	uM	FARAGE	GCB-DLBCL
12	Acalabrutinib	Palbociclib HCl	0.0123457	0.0411523	6.01211	uM	uM	FARAGE	GCB-DLBCL
12	Acalabrutinib	Palbociclib HCl	0.00411523	0.0411523	5.85876	uM	uM	FARAGE	GCB-DLBCL
12	Acalabrutinib	Palbociclib HCl	0	0.0411523	11.4541	uM	uM	FARAGE	GCB-DLBCL
12	Acalabrutinib	Palbociclib HCl	1	0	6.49348	uM	uM	FARAGE	GCB-DLBCL
12	Acalabrutinib	Palbociclib HCl	0.333333	0	1.46682	uM	uM	FARAGE	GCB-DLBCL
12	Acalabrutinib	Palbociclib HCl	0.111111	0	-15.0615	uM	uM	FARAGE	GCB-DLBCL
12	Acalabrutinib	Palbociclib HCl	0.037037	0	-16.8038	uM	uM	FARAGE	GCB-DLBCL
12	Acalabrutinib	Palbociclib HCl	0.0123457	0	5.5776	uM	uM	FARAGE	GCB-DLBCL
12	Acalabrutinib	Palbociclib HCl	0.00411523	0	8.52544	uM	uM	FARAGE	GCB-DLBCL
12	Acalabrutinib	Palbociclib HCl	0	0	7.09412	uM	uM	FARAGE	GCB-DLBCL
7	Acalabrutinib	Capivasertib	1	10	89.297	uM	uM	FARAGE	GCB-DLBCL
7	Acalabrutinib	Capivasertib	0.333333	10	89.312	uM	uM	FARAGE	GCB-DLBCL
7	Acalabrutinib	Capivasertib	0.111111	10	83.8891	uM	uM	FARAGE	GCB-DLBCL
7	Acalabrutinib	Capivasertib	0.037037	10	84.641	uM	uM	FARAGE	GCB-DLBCL
7	Acalabrutinib	Capivasertib	0.0123457	10	86.0531	uM	uM	FARAGE	GCB-DLBCL
7	Acalabrutinib	Capivasertib	0.00411523	10	92.9712	uM	uM	FARAGE	GCB-DLBCL
7	Acalabrutinib	Capivasertib	0	10	93.6869	uM	uM	FARAGE	GCB-DLBCL
7	Acalabrutinib	Capivasertib	1	3.33333	89.7742	uM	uM	FARAGE	GCB-DLBCL
7	Acalabrutinib	Capivasertib	0.333333	3.33333	90.3024	uM	uM	FARAGE	GCB-DLBCL
7	Acalabrutinib	Capivasertib	0.111111	3.33333	86.1788	uM	uM	FARAGE	GCB-DLBCL
7	Acalabrutinib	Capivasertib	0.037037	3.33333	83.9232	uM	uM	FARAGE	GCB-DLBCL
7	Acalabrutinib	Capivasertib	0.0123457	3.33333	72.1212	uM	uM	FARAGE	GCB-DLBCL
7	Acalabrutinib	Capivasertib	0.00411523	3.33333	88.6879	uM	uM	FARAGE	GCB-DLBCL
7	Acalabrutinib	Capivasertib	0	3.33333	88.8775	uM	uM	FARAGE	GCB-DLBCL
7	Acalabrutinib	Capivasertib	1	1.11111	87.4653	uM	uM	FARAGE	GCB-DLBCL
7	Acalabrutinib	Capivasertib	0.333333	1.11111	87.5995	uM	uM	FARAGE	GCB-DLBCL
7	Acalabrutinib	Capivasertib	0.111111	1.11111	88.8987	uM	uM	FARAGE	GCB-DLBCL
7	Acalabrutinib	Capivasertib	0.037037	1.11111	69.2245	uM	uM	FARAGE	GCB-DLBCL
7	Acalabrutinib	Capivasertib	0.0123457	1.11111	76.4194	uM	uM	FARAGE	GCB-DLBCL
7	Acalabrutinib	Capivasertib	0.00411523	1.11111	79.3161	uM	uM	FARAGE	GCB-DLBCL
7	Acalabrutinib	Capivasertib	0	1.11111	84.7155	uM	uM	FARAGE	GCB-DLBCL
7	Acalabrutinib	Capivasertib	1	0.37037	81.4503	uM	uM	FARAGE	GCB-DLBCL
7	Acalabrutinib	Capivasertib	0.333333	0.37037	78.9775	uM	uM	FARAGE	GCB-DLBCL
7	Acalabrutinib	Capivasertib	0.111111	0.37037	82.526	uM	uM	FARAGE	GCB-DLBCL
7	Acalabrutinib	Capivasertib	0.037037	0.37037	56.6791	uM	uM	FARAGE	GCB-DLBCL
7	Acalabrutinib	Capivasertib	0.0123457	0.37037	53.4395	uM	uM	FARAGE	GCB-DLBCL
7	Acalabrutinib	Capivasertib	0.00411523	0.37037	59.3884	uM	uM	FARAGE	GCB-DLBCL
7	Acalabrutinib	Capivasertib	0	0.37037	66.8113	uM	uM	FARAGE	GCB-DLBCL
7	Acalabrutinib	Capivasertib	1	0.123457	69.7612	uM	uM	FARAGE	GCB-DLBCL
7	Acalabrutinib	Capivasertib	0.333333	0.123457	54.6301	uM	uM	FARAGE	GCB-DLBCL
7	Acalabrutinib	Capivasertib	0.111111	0.123457	50.9965	uM	uM	FARAGE	GCB-DLBCL
7	Acalabrutinib	Capivasertib	0.037037	0.123457	34.483	uM	uM	FARAGE	GCB-DLBCL
7	Acalabrutinib	Capivasertib	0.0123457	0.123457	-8.15625	uM	uM	FARAGE	GCB-DLBCL
7	Acalabrutinib	Capivasertib	0.00411523	0.123457	31.2796	uM	uM	FARAGE	GCB-DLBCL
7	Acalabrutinib	Capivasertib	0	0.123457	48.9858	uM	uM	FARAGE	GCB-DLBCL
7	Acalabrutinib	Capivasertib	1	0.0411523	59.5396	uM	uM	FARAGE	GCB-DLBCL
7	Acalabrutinib	Capivasertib	0.333333	0.0411523	50.6983	uM	uM	FARAGE	GCB-DLBCL
7	Acalabrutinib	Capivasertib	0.111111	0.0411523	-1.51723	uM	uM	FARAGE	GCB-DLBCL
7	Acalabrutinib	Capivasertib	0.037037	0.0411523	24.3275	uM	uM	FARAGE	GCB-DLBCL
7	Acalabrutinib	Capivasertib	0.0123457	0.0411523	-27.4429	uM	uM	FARAGE	GCB-DLBCL
7	Acalabrutinib	Capivasertib	0.00411523	0.0411523	-0.682291	uM	uM	FARAGE	GCB-DLBCL
7	Acalabrutinib	Capivasertib	0	0.0411523	20.8599	uM	uM	FARAGE	GCB-DLBCL
7	Acalabrutinib	Capivasertib	1	0	-10.3075	uM	uM	FARAGE	GCB-DLBCL
7	Acalabrutinib	Capivasertib	0.333333	0	-9.1339	uM	uM	FARAGE	GCB-DLBCL
7	Acalabrutinib	Capivasertib	0.111111	0	-3.56623	uM	uM	FARAGE	GCB-DLBCL
7	Acalabrutinib	Capivasertib	0.037037	0	-4.99968	uM	uM	FARAGE	GCB-DLBCL
7	Acalabrutinib	Capivasertib	0.0123457	0	-6.00501	uM	uM	FARAGE	GCB-DLBCL
7	Acalabrutinib	Capivasertib	0.00411523	0	-8.22654	uM	uM	FARAGE	GCB-DLBCL
7	Acalabrutinib	Capivasertib	0	0	5.02382	uM	uM	FARAGE	GCB-DLBCL
8	Acalabrutinib	Daporinad	1	0.01	87.9957	uM	uM	FARAGE	GCB-DLBCL
8	Acalabrutinib	Daporinad	0.333333	0.01	90.8902	uM	uM	FARAGE	GCB-DLBCL
8	Acalabrutinib	Daporinad	0.111111	0.01	84.6836	uM	uM	FARAGE	GCB-DLBCL
8	Acalabrutinib	Daporinad	0.037037	0.01	23.9675	uM	uM	FARAGE	GCB-DLBCL
8	Acalabrutinib	Daporinad	0.0123457	0.01	93.9105	uM	uM	FARAGE	GCB-DLBCL
8	Acalabrutinib	Daporinad	0.00411523	0.01	92.7795	uM	uM	FARAGE	GCB-DLBCL
8	Acalabrutinib	Daporinad	0	0.01	94.7412	uM	uM	FARAGE	GCB-DLBCL
8	Acalabrutinib	Daporinad	1	0.00333333	38.9666	uM	uM	FARAGE	GCB-DLBCL
8	Acalabrutinib	Daporinad	0.333333	0.00333333	60.9177	uM	uM	FARAGE	GCB-DLBCL
8	Acalabrutinib	Daporinad	0.111111	0.00333333	75.3651	uM	uM	FARAGE	GCB-DLBCL
8	Acalabrutinib	Daporinad	0.037037	0.00333333	45.3883	uM	uM	FARAGE	GCB-DLBCL
8	Acalabrutinib	Daporinad	0.0123457	0.00333333	21.1155	uM	uM	FARAGE	GCB-DLBCL
8	Acalabrutinib	Daporinad	0.00411523	0.00333333	8.73205	uM	uM	FARAGE	GCB-DLBCL
8	Acalabrutinib	Daporinad	0	0.00333333	60.7708	uM	uM	FARAGE	GCB-DLBCL
8	Acalabrutinib	Daporinad	1	0.00111111	16.353	uM	uM	FARAGE	GCB-DLBCL
8	Acalabrutinib	Daporinad	0.333333	0.00111111	24.0847	uM	uM	FARAGE	GCB-DLBCL
8	Acalabrutinib	Daporinad	0.111111	0.00111111	12.4254	uM	uM	FARAGE	GCB-DLBCL
8	Acalabrutinib	Daporinad	0.037037	0.00111111	17.0814	uM	uM	FARAGE	GCB-DLBCL
8	Acalabrutinib	Daporinad	0.0123457	0.00111111	9.25601	uM	uM	FARAGE	GCB-DLBCL
8	Acalabrutinib	Daporinad	0.00411523	0.00111111	2.37417	uM	uM	FARAGE	GCB-DLBCL
8	Acalabrutinib	Daporinad	0	0.00111111	5.2432	uM	uM	FARAGE	GCB-DLBCL
8	Acalabrutinib	Daporinad	1	0.00037037	8.81724	uM	uM	FARAGE	GCB-DLBCL
8	Acalabrutinib	Daporinad	0.333333	0.00037037	11.4264	uM	uM	FARAGE	GCB-DLBCL
8	Acalabrutinib	Daporinad	0.111111	0.00037037	5.35183	uM	uM	FARAGE	GCB-DLBCL
8	Acalabrutinib	Daporinad	0.037037	0.00037037	12.468	uM	uM	FARAGE	GCB-DLBCL
8	Acalabrutinib	Daporinad	0.0123457	0.00037037	-0.105077	uM	uM	FARAGE	GCB-DLBCL
8	Acalabrutinib	Daporinad	0.00411523	0.00037037	-33.2874	uM	uM	FARAGE	GCB-DLBCL
8	Acalabrutinib	Daporinad	0	0.00037037	-13.5727	uM	uM	FARAGE	GCB-DLBCL
8	Acalabrutinib	Daporinad	1	0.000123457	21.6608	uM	uM	FARAGE	GCB-DLBCL
8	Acalabrutinib	Daporinad	0.333333	0.000123457	16.2017	uM	uM	FARAGE	GCB-DLBCL
8	Acalabrutinib	Daporinad	0.111111	0.000123457	15.2837	uM	uM	FARAGE	GCB-DLBCL
8	Acalabrutinib	Daporinad	0.037037	0.000123457	18.2529	uM	uM	FARAGE	GCB-DLBCL
8	Acalabrutinib	Daporinad	0.0123457	0.000123457	5.3071	uM	uM	FARAGE	GCB-DLBCL
8	Acalabrutinib	Daporinad	0.00411523	0.000123457	0.497696	uM	uM	FARAGE	GCB-DLBCL
8	Acalabrutinib	Daporinad	0	0.000123457	-33.7709	uM	uM	FARAGE	GCB-DLBCL
8	Acalabrutinib	Daporinad	1	4.12e-05	15.4648	uM	uM	FARAGE	GCB-DLBCL
8	Acalabrutinib	Daporinad	0.333333	4.12e-05	24.4595	uM	uM	FARAGE	GCB-DLBCL
8	Acalabrutinib	Daporinad	0.111111	4.12e-05	3.62658	uM	uM	FARAGE	GCB-DLBCL
8	Acalabrutinib	Daporinad	0.037037	4.12e-05	4.16545	uM	uM	FARAGE	GCB-DLBCL
8	Acalabrutinib	Daporinad	0.0123457	4.12e-05	-13.0146	uM	uM	FARAGE	GCB-DLBCL
8	Acalabrutinib	Daporinad	0.00411523	4.12e-05	-11.2596	uM	uM	FARAGE	GCB-DLBCL
8	Acalabrutinib	Daporinad	0	4.12e-05	1.14733	uM	uM	FARAGE	GCB-DLBCL
8	Acalabrutinib	Daporinad	1	0	7.8396	uM	uM	FARAGE	GCB-DLBCL
8	Acalabrutinib	Daporinad	0.333333	0	-0.298902	uM	uM	FARAGE	GCB-DLBCL
8	Acalabrutinib	Daporinad	0.111111	0	0.306001	uM	uM	FARAGE	GCB-DLBCL
8	Acalabrutinib	Daporinad	0.037037	0	-23.4364	uM	uM	FARAGE	GCB-DLBCL
8	Acalabrutinib	Daporinad	0.0123457	0	11.912	uM	uM	FARAGE	GCB-DLBCL
8	Acalabrutinib	Daporinad	0.00411523	0	7.5691	uM	uM	FARAGE	GCB-DLBCL
8	Acalabrutinib	Daporinad	0	0	10.6107	uM	uM	FARAGE	GCB-DLBCL
9	Acalabrutinib	Doxorubicin HCl	1	0.01	11.2347	uM	uM	FARAGE	GCB-DLBCL
9	Acalabrutinib	Doxorubicin HCl	0.333333	0.01	56.6877	uM	uM	FARAGE	GCB-DLBCL
9	Acalabrutinib	Doxorubicin HCl	0.111111	0.01	69.1585	uM	uM	FARAGE	GCB-DLBCL
9	Acalabrutinib	Doxorubicin HCl	0.037037	0.01	37.8121	uM	uM	FARAGE	GCB-DLBCL
9	Acalabrutinib	Doxorubicin HCl	0.0123457	0.01	35.9101	uM	uM	FARAGE	GCB-DLBCL
9	Acalabrutinib	Doxorubicin HCl	0.00411523	0.01	53.0987	uM	uM	FARAGE	GCB-DLBCL
9	Acalabrutinib	Doxorubicin HCl	0	0.01	62.1084	uM	uM	FARAGE	GCB-DLBCL
9	Acalabrutinib	Doxorubicin HCl	1	0.00333333	35.5182	uM	uM	FARAGE	GCB-DLBCL
9	Acalabrutinib	Doxorubicin HCl	0.333333	0.00333333	75.4759	uM	uM	FARAGE	GCB-DLBCL
9	Acalabrutinib	Doxorubicin HCl	0.111111	0.00333333	34.7003	uM	uM	FARAGE	GCB-DLBCL
9	Acalabrutinib	Doxorubicin HCl	0.037037	0.00333333	37.4202	uM	uM	FARAGE	GCB-DLBCL
9	Acalabrutinib	Doxorubicin HCl	0.0123457	0.00333333	47.6184	uM	uM	FARAGE	GCB-DLBCL
9	Acalabrutinib	Doxorubicin HCl	0.00411523	0.00333333	34.1295	uM	uM	FARAGE	GCB-DLBCL
9	Acalabrutinib	Doxorubicin HCl	0	0.00333333	31.6353	uM	uM	FARAGE	GCB-DLBCL
9	Acalabrutinib	Doxorubicin HCl	1	0.00111111	9.06432	uM	uM	FARAGE	GCB-DLBCL
9	Acalabrutinib	Doxorubicin HCl	0.333333	0.00111111	22.6384	uM	uM	FARAGE	GCB-DLBCL
9	Acalabrutinib	Doxorubicin HCl	0.111111	0.00111111	10.8875	uM	uM	FARAGE	GCB-DLBCL
9	Acalabrutinib	Doxorubicin HCl	0.037037	0.00111111	29.499	uM	uM	FARAGE	GCB-DLBCL
9	Acalabrutinib	Doxorubicin HCl	0.0123457	0.00111111	37.58	uM	uM	FARAGE	GCB-DLBCL
9	Acalabrutinib	Doxorubicin HCl	0.00411523	0.00111111	25.6033	uM	uM	FARAGE	GCB-DLBCL
9	Acalabrutinib	Doxorubicin HCl	0	0.00111111	9.8524	uM	uM	FARAGE	GCB-DLBCL
9	Acalabrutinib	Doxorubicin HCl	1	0.00037037	17.8972	uM	uM	FARAGE	GCB-DLBCL
9	Acalabrutinib	Doxorubicin HCl	0.333333	0.00037037	6.48709	uM	uM	FARAGE	GCB-DLBCL
9	Acalabrutinib	Doxorubicin HCl	0.111111	0.00037037	-13.5663	uM	uM	FARAGE	GCB-DLBCL
9	Acalabrutinib	Doxorubicin HCl	0.037037	0.00037037	17.5095	uM	uM	FARAGE	GCB-DLBCL
9	Acalabrutinib	Doxorubicin HCl	0.0123457	0.00037037	20.1954	uM	uM	FARAGE	GCB-DLBCL
9	Acalabrutinib	Doxorubicin HCl	0.00411523	0.00037037	7.26239	uM	uM	FARAGE	GCB-DLBCL
9	Acalabrutinib	Doxorubicin HCl	0	0.00037037	6.19955	uM	uM	FARAGE	GCB-DLBCL
9	Acalabrutinib	Doxorubicin HCl	1	0.000123457	21.763	uM	uM	FARAGE	GCB-DLBCL
9	Acalabrutinib	Doxorubicin HCl	0.333333	0.000123457	-0.71211	uM	uM	FARAGE	GCB-DLBCL
9	Acalabrutinib	Doxorubicin HCl	0.111111	0.000123457	0.131346	uM	uM	FARAGE	GCB-DLBCL
9	Acalabrutinib	Doxorubicin HCl	0.037037	0.000123457	5.20486	uM	uM	FARAGE	GCB-DLBCL
9	Acalabrutinib	Doxorubicin HCl	0.0123457	0.000123457	24.1273	uM	uM	FARAGE	GCB-DLBCL
9	Acalabrutinib	Doxorubicin HCl	0.00411523	0.000123457	5.58825	uM	uM	FARAGE	GCB-DLBCL
9	Acalabrutinib	Doxorubicin HCl	0	0.000123457	15.6522	uM	uM	FARAGE	GCB-DLBCL
9	Acalabrutinib	Doxorubicin HCl	1	4.12e-05	6.40189	uM	uM	FARAGE	GCB-DLBCL
9	Acalabrutinib	Doxorubicin HCl	0.333333	4.12e-05	-7.02099	uM	uM	FARAGE	GCB-DLBCL
9	Acalabrutinib	Doxorubicin HCl	0.111111	4.12e-05	0.546685	uM	uM	FARAGE	GCB-DLBCL
9	Acalabrutinib	Doxorubicin HCl	0.037037	4.12e-05	0.418888	uM	uM	FARAGE	GCB-DLBCL
9	Acalabrutinib	Doxorubicin HCl	0.0123457	4.12e-05	6.92586	uM	uM	FARAGE	GCB-DLBCL
9	Acalabrutinib	Doxorubicin HCl	0.00411523	4.12e-05	12.5958	uM	uM	FARAGE	GCB-DLBCL
9	Acalabrutinib	Doxorubicin HCl	0	4.12e-05	5.8119	uM	uM	FARAGE	GCB-DLBCL
9	Acalabrutinib	Doxorubicin HCl	1	0	13.2795	uM	uM	FARAGE	GCB-DLBCL
9	Acalabrutinib	Doxorubicin HCl	0.333333	0	-0.392619	uM	uM	FARAGE	GCB-DLBCL
9	Acalabrutinib	Doxorubicin HCl	0.111111	0	-9.12964	uM	uM	FARAGE	GCB-DLBCL
9	Acalabrutinib	Doxorubicin HCl	0.037037	0	-4.39478	uM	uM	FARAGE	GCB-DLBCL
9	Acalabrutinib	Doxorubicin HCl	0.0123457	0	1.04296	uM	uM	FARAGE	GCB-DLBCL
9	Acalabrutinib	Doxorubicin HCl	0.00411523	0	4.56588	uM	uM	FARAGE	GCB-DLBCL
9	Acalabrutinib	Doxorubicin HCl	0	0	2.49345	uM	uM	FARAGE	GCB-DLBCL
10	Acalabrutinib	Fexagratinib	1	10	57.8889	uM	uM	FARAGE	GCB-DLBCL
10	Acalabrutinib	Fexagratinib	0.333333	10	52.4235	uM	uM	FARAGE	GCB-DLBCL
10	Acalabrutinib	Fexagratinib	0.111111	10	49.7824	uM	uM	FARAGE	GCB-DLBCL
10	Acalabrutinib	Fexagratinib	0.037037	10	31.3052	uM	uM	FARAGE	GCB-DLBCL
10	Acalabrutinib	Fexagratinib	0.0123457	10	19.6991	uM	uM	FARAGE	GCB-DLBCL
10	Acalabrutinib	Fexagratinib	0.00411523	10	71.1926	uM	uM	FARAGE	GCB-DLBCL
10	Acalabrutinib	Fexagratinib	0	10	51.5992	uM	uM	FARAGE	GCB-DLBCL
10	Acalabrutinib	Fexagratinib	1	3.33333	42.2403	uM	uM	FARAGE	GCB-DLBCL
10	Acalabrutinib	Fexagratinib	0.333333	3.33333	62.4449	uM	uM	FARAGE	GCB-DLBCL
10	Acalabrutinib	Fexagratinib	0.111111	3.33333	48.3362	uM	uM	FARAGE	GCB-DLBCL
10	Acalabrutinib	Fexagratinib	0.037037	3.33333	31.2072	uM	uM	FARAGE	GCB-DLBCL
10	Acalabrutinib	Fexagratinib	0.0123457	3.33333	35.6055	uM	uM	FARAGE	GCB-DLBCL
10	Acalabrutinib	Fexagratinib	0.00411523	3.33333	18.8109	uM	uM	FARAGE	GCB-DLBCL
10	Acalabrutinib	Fexagratinib	0	3.33333	26.8578	uM	uM	FARAGE	GCB-DLBCL
10	Acalabrutinib	Fexagratinib	1	1.11111	20.8855	uM	uM	FARAGE	GCB-DLBCL
10	Acalabrutinib	Fexagratinib	0.333333	1.11111	31.4457	uM	uM	FARAGE	GCB-DLBCL
10	Acalabrutinib	Fexagratinib	0.111111	1.11111	17.403	uM	uM	FARAGE	GCB-DLBCL
10	Acalabrutinib	Fexagratinib	0.037037	1.11111	4.90667	uM	uM	FARAGE	GCB-DLBCL
10	Acalabrutinib	Fexagratinib	0.0123457	1.11111	-6.19884	uM	uM	FARAGE	GCB-DLBCL
10	Acalabrutinib	Fexagratinib	0.00411523	1.11111	-12.4289	uM	uM	FARAGE	GCB-DLBCL
10	Acalabrutinib	Fexagratinib	0	1.11111	-19.9583	uM	uM	FARAGE	GCB-DLBCL
10	Acalabrutinib	Fexagratinib	1	0.37037	16.6171	uM	uM	FARAGE	GCB-DLBCL
10	Acalabrutinib	Fexagratinib	0.333333	0.37037	24.5873	uM	uM	FARAGE	GCB-DLBCL
10	Acalabrutinib	Fexagratinib	0.111111	0.37037	22.2529	uM	uM	FARAGE	GCB-DLBCL
10	Acalabrutinib	Fexagratinib	0.037037	0.37037	-1.44481	uM	uM	FARAGE	GCB-DLBCL
10	Acalabrutinib	Fexagratinib	0.0123457	0.37037	-7.80907	uM	uM	FARAGE	GCB-DLBCL
10	Acalabrutinib	Fexagratinib	0.00411523	0.37037	-7.68128	uM	uM	FARAGE	GCB-DLBCL
10	Acalabrutinib	Fexagratinib	0	0.37037	1.2517	uM	uM	FARAGE	GCB-DLBCL
10	Acalabrutinib	Fexagratinib	1	0.123457	10.8556	uM	uM	FARAGE	GCB-DLBCL
10	Acalabrutinib	Fexagratinib	0.333333	0.123457	18.6682	uM	uM	FARAGE	GCB-DLBCL
10	Acalabrutinib	Fexagratinib	0.111111	0.123457	2.00356	uM	uM	FARAGE	GCB-DLBCL
10	Acalabrutinib	Fexagratinib	0.037037	0.123457	-1.23821	uM	uM	FARAGE	GCB-DLBCL
10	Acalabrutinib	Fexagratinib	0.0123457	0.123457	-0.827127	uM	uM	FARAGE	GCB-DLBCL
10	Acalabrutinib	Fexagratinib	0.00411523	0.123457	0.636142	uM	uM	FARAGE	GCB-DLBCL
10	Acalabrutinib	Fexagratinib	0	0.123457	10.649	uM	uM	FARAGE	GCB-DLBCL
10	Acalabrutinib	Fexagratinib	1	0.0411523	15.4307	uM	uM	FARAGE	GCB-DLBCL
10	Acalabrutinib	Fexagratinib	0.333333	0.0411523	4.11221	uM	uM	FARAGE	GCB-DLBCL
10	Acalabrutinib	Fexagratinib	0.111111	0.0411523	6.9003	uM	uM	FARAGE	GCB-DLBCL
10	Acalabrutinib	Fexagratinib	0.037037	0.0411523	11.305	uM	uM	FARAGE	GCB-DLBCL
10	Acalabrutinib	Fexagratinib	0.0123457	0.0411523	9.7033	uM	uM	FARAGE	GCB-DLBCL
10	Acalabrutinib	Fexagratinib	0.00411523	0.0411523	4.0121	uM	uM	FARAGE	GCB-DLBCL
10	Acalabrutinib	Fexagratinib	0	0.0411523	3.31987	uM	uM	FARAGE	GCB-DLBCL
10	Acalabrutinib	Fexagratinib	1	0	22.9579	uM	uM	FARAGE	GCB-DLBCL
10	Acalabrutinib	Fexagratinib	0.333333	0	20.943	uM	uM	FARAGE	GCB-DLBCL
10	Acalabrutinib	Fexagratinib	0.111111	0	4.29751	uM	uM	FARAGE	GCB-DLBCL
10	Acalabrutinib	Fexagratinib	0.037037	0	3.65427	uM	uM	FARAGE	GCB-DLBCL
10	Acalabrutinib	Fexagratinib	0.0123457	0	11.0665	uM	uM	FARAGE	GCB-DLBCL
10	Acalabrutinib	Fexagratinib	0.00411523	0	9.88008	uM	uM	FARAGE	GCB-DLBCL
10	Acalabrutinib	Fexagratinib	0	0	7.58827	uM	uM	FARAGE	GCB-DLBCL
11	Acalabrutinib	Lapatinib	1	10	31.8696	uM	uM	FARAGE	GCB-DLBCL
11	Acalabrutinib	Lapatinib	0.333333	10	40.0763	uM	uM	FARAGE	GCB-DLBCL
11	Acalabrutinib	Lapatinib	0.111111	10	52.9517	uM	uM	FARAGE	GCB-DLBCL
11	Acalabrutinib	Lapatinib	0.037037	10	33.3946	uM	uM	FARAGE	GCB-DLBCL
11	Acalabrutinib	Lapatinib	0.0123457	10	55.2734	uM	uM	FARAGE	GCB-DLBCL
11	Acalabrutinib	Lapatinib	0.00411523	10	43.8974	uM	uM	FARAGE	GCB-DLBCL
11	Acalabrutinib	Lapatinib	0	10	43.0944	uM	uM	FARAGE	GCB-DLBCL
11	Acalabrutinib	Lapatinib	1	3.33333	16.2124	uM	uM	FARAGE	GCB-DLBCL
11	Acalabrutinib	Lapatinib	0.333333	3.33333	21.8333	uM	uM	FARAGE	GCB-DLBCL
11	Acalabrutinib	Lapatinib	0.111111	3.33333	31.7631	uM	uM	FARAGE	GCB-DLBCL
11	Acalabrutinib	Lapatinib	0.037037	3.33333	12.9515	uM	uM	FARAGE	GCB-DLBCL
11	Acalabrutinib	Lapatinib	0.0123457	3.33333	21.7481	uM	uM	FARAGE	GCB-DLBCL
11	Acalabrutinib	Lapatinib	0.00411523	3.33333	28.5022	uM	uM	FARAGE	GCB-DLBCL
11	Acalabrutinib	Lapatinib	0	3.33333	10.0803	uM	uM	FARAGE	GCB-DLBCL
11	Acalabrutinib	Lapatinib	1	1.11111	7.30286	uM	uM	FARAGE	GCB-DLBCL
11	Acalabrutinib	Lapatinib	0.333333	1.11111	-8.76329	uM	uM	FARAGE	GCB-DLBCL
11	Acalabrutinib	Lapatinib	0.111111	1.11111	-0.784528	uM	uM	FARAGE	GCB-DLBCL
11	Acalabrutinib	Lapatinib	0.037037	1.11111	7.60744	uM	uM	FARAGE	GCB-DLBCL
11	Acalabrutinib	Lapatinib	0.0123457	1.11111	2.54883	uM	uM	FARAGE	GCB-DLBCL
11	Acalabrutinib	Lapatinib	0.00411523	1.11111	5.73309	uM	uM	FARAGE	GCB-DLBCL
11	Acalabrutinib	Lapatinib	0	1.11111	-1.52362	uM	uM	FARAGE	GCB-DLBCL
11	Acalabrutinib	Lapatinib	1	0.37037	15.4052	uM	uM	FARAGE	GCB-DLBCL
11	Acalabrutinib	Lapatinib	0.333333	0.37037	-5.64079	uM	uM	FARAGE	GCB-DLBCL
11	Acalabrutinib	Lapatinib	0.111111	0.37037	-0.580054	uM	uM	FARAGE	GCB-DLBCL
11	Acalabrutinib	Lapatinib	0.037037	0.37037	10.0292	uM	uM	FARAGE	GCB-DLBCL
11	Acalabrutinib	Lapatinib	0.0123457	0.37037	4.88963	uM	uM	FARAGE	GCB-DLBCL
11	Acalabrutinib	Lapatinib	0.00411523	0.37037	10.7108	uM	uM	FARAGE	GCB-DLBCL
11	Acalabrutinib	Lapatinib	0	0.37037	7.89285	uM	uM	FARAGE	GCB-DLBCL
11	Acalabrutinib	Lapatinib	1	0.123457	14.632	uM	uM	FARAGE	GCB-DLBCL
11	Acalabrutinib	Lapatinib	0.333333	0.123457	2.17396	uM	uM	FARAGE	GCB-DLBCL
11	Acalabrutinib	Lapatinib	0.111111	0.123457	15.6437	uM	uM	FARAGE	GCB-DLBCL
11	Acalabrutinib	Lapatinib	0.037037	0.123457	12.0782	uM	uM	FARAGE	GCB-DLBCL
11	Acalabrutinib	Lapatinib	0.0123457	0.123457	15.2028	uM	uM	FARAGE	GCB-DLBCL
11	Acalabrutinib	Lapatinib	0.00411523	0.123457	7.71393	uM	uM	FARAGE	GCB-DLBCL
11	Acalabrutinib	Lapatinib	0	0.123457	10.2443	uM	uM	FARAGE	GCB-DLBCL
11	Acalabrutinib	Lapatinib	1	0.0411523	21.1134	uM	uM	FARAGE	GCB-DLBCL
11	Acalabrutinib	Lapatinib	0.333333	0.0411523	7.83534	uM	uM	FARAGE	GCB-DLBCL
11	Acalabrutinib	Lapatinib	0.111111	0.0411523	24.3701	uM	uM	FARAGE	GCB-DLBCL
11	Acalabrutinib	Lapatinib	0.037037	0.0411523	5.64363	uM	uM	FARAGE	GCB-DLBCL
11	Acalabrutinib	Lapatinib	0.0123457	0.0411523	16.3785	uM	uM	FARAGE	GCB-DLBCL
11	Acalabrutinib	Lapatinib	0.00411523	0.0411523	6.48496	uM	uM	FARAGE	GCB-DLBCL
11	Acalabrutinib	Lapatinib	0	0.0411523	14.4871	uM	uM	FARAGE	GCB-DLBCL
11	Acalabrutinib	Lapatinib	1	0	-8.35008	uM	uM	FARAGE	GCB-DLBCL
11	Acalabrutinib	Lapatinib	0.333333	0	16.9685	uM	uM	FARAGE	GCB-DLBCL
11	Acalabrutinib	Lapatinib	0.111111	0	20.2295	uM	uM	FARAGE	GCB-DLBCL
11	Acalabrutinib	Lapatinib	0.037037	0	9.48392	uM	uM	FARAGE	GCB-DLBCL
11	Acalabrutinib	Lapatinib	0.0123457	0	9.64153	uM	uM	FARAGE	GCB-DLBCL
11	Acalabrutinib	Lapatinib	0.00411523	0	2.46576	uM	uM	FARAGE	GCB-DLBCL
11	Acalabrutinib	Lapatinib	0	0	3.82253	uM	uM	FARAGE	GCB-DLBCL
12	Acalabrutinib	Palbociclib HCl	1	10	46.4277	uM	uM	FARAGE	GCB-DLBCL
12	Acalabrutinib	Palbociclib HCl	0.333333	10	41.2115	uM	uM	FARAGE	GCB-DLBCL
12	Acalabrutinib	Palbociclib HCl	0.111111	10	79.2608	uM	uM	FARAGE	GCB-DLBCL
12	Acalabrutinib	Palbociclib HCl	0.037037	10	84.2171	uM	uM	FARAGE	GCB-DLBCL
12	Acalabrutinib	Palbociclib HCl	0.0123457	10	82.4663	uM	uM	FARAGE	GCB-DLBCL
12	Acalabrutinib	Palbociclib HCl	0.00411523	10	82.6367	uM	uM	FARAGE	GCB-DLBCL
12	Acalabrutinib	Palbociclib HCl	0	10	87.1288	uM	uM	FARAGE	GCB-DLBCL
12	Acalabrutinib	Palbociclib HCl	1	3.33333	37.8398	uM	uM	FARAGE	GCB-DLBCL
12	Acalabrutinib	Palbociclib HCl	0.333333	3.33333	39.4011	uM	uM	FARAGE	GCB-DLBCL
12	Acalabrutinib	Palbociclib HCl	0.111111	3.33333	59.4949	uM	uM	FARAGE	GCB-DLBCL
12	Acalabrutinib	Palbociclib HCl	0.037037	3.33333	41.3776	uM	uM	FARAGE	GCB-DLBCL
12	Acalabrutinib	Palbociclib HCl	0.0123457	3.33333	38.7472	uM	uM	FARAGE	GCB-DLBCL
12	Acalabrutinib	Palbociclib HCl	0.00411523	3.33333	52.7302	uM	uM	FARAGE	GCB-DLBCL
12	Acalabrutinib	Palbociclib HCl	0	3.33333	65.3246	uM	uM	FARAGE	GCB-DLBCL
12	Acalabrutinib	Palbociclib HCl	1	1.11111	25.0517	uM	uM	FARAGE	GCB-DLBCL
12	Acalabrutinib	Palbociclib HCl	0.333333	1.11111	41.105	uM	uM	FARAGE	GCB-DLBCL
12	Acalabrutinib	Palbociclib HCl	0.111111	1.11111	40.7621	uM	uM	FARAGE	GCB-DLBCL
12	Acalabrutinib	Palbociclib HCl	0.037037	1.11111	30.5128	uM	uM	FARAGE	GCB-DLBCL
12	Acalabrutinib	Palbociclib HCl	0.0123457	1.11111	39.1902	uM	uM	FARAGE	GCB-DLBCL
12	Acalabrutinib	Palbociclib HCl	0.00411523	1.11111	2.19313	uM	uM	FARAGE	GCB-DLBCL
12	Acalabrutinib	Palbociclib HCl	0	1.11111	19.1304	uM	uM	FARAGE	GCB-DLBCL
12	Acalabrutinib	Palbociclib HCl	1	0.37037	31.4521	uM	uM	FARAGE	GCB-DLBCL
12	Acalabrutinib	Palbociclib HCl	0.333333	0.37037	23.9973	uM	uM	FARAGE	GCB-DLBCL
12	Acalabrutinib	Palbociclib HCl	0.111111	0.37037	31.1135	uM	uM	FARAGE	GCB-DLBCL
12	Acalabrutinib	Palbociclib HCl	0.037037	0.37037	33.5352	uM	uM	FARAGE	GCB-DLBCL
12	Acalabrutinib	Palbociclib HCl	0.0123457	0.37037	28.5022	uM	uM	FARAGE	GCB-DLBCL
12	Acalabrutinib	Palbociclib HCl	0.00411523	0.37037	20.0527	uM	uM	FARAGE	GCB-DLBCL
12	Acalabrutinib	Palbociclib HCl	0	0.37037	15.8588	uM	uM	FARAGE	GCB-DLBCL
12	Acalabrutinib	Palbociclib HCl	1	0.123457	22.4212	uM	uM	FARAGE	GCB-DLBCL
12	Acalabrutinib	Palbociclib HCl	0.333333	0.123457	32.5959	uM	uM	FARAGE	GCB-DLBCL
12	Acalabrutinib	Palbociclib HCl	0.111111	0.123457	33.5224	uM	uM	FARAGE	GCB-DLBCL
12	Acalabrutinib	Palbociclib HCl	0.037037	0.123457	16.5489	uM	uM	FARAGE	GCB-DLBCL
12	Acalabrutinib	Palbociclib HCl	0.0123457	0.123457	14.5745	uM	uM	FARAGE	GCB-DLBCL
12	Acalabrutinib	Palbociclib HCl	0.00411523	0.123457	8.75974	uM	uM	FARAGE	GCB-DLBCL
12	Acalabrutinib	Palbociclib HCl	0	0.123457	16.8088	uM	uM	FARAGE	GCB-DLBCL
12	Acalabrutinib	Palbociclib HCl	1	0.0411523	11.256	uM	uM	FARAGE	GCB-DLBCL
12	Acalabrutinib	Palbociclib HCl	0.333333	0.0411523	9.76507	uM	uM	FARAGE	GCB-DLBCL
12	Acalabrutinib	Palbociclib HCl	0.111111	0.0411523	23.8717	uM	uM	FARAGE	GCB-DLBCL
12	Acalabrutinib	Palbociclib HCl	0.037037	0.0411523	5.92265	uM	uM	FARAGE	GCB-DLBCL
12	Acalabrutinib	Palbociclib HCl	0.0123457	0.0411523	13.0239	uM	uM	FARAGE	GCB-DLBCL
12	Acalabrutinib	Palbociclib HCl	0.00411523	0.0411523	14.1911	uM	uM	FARAGE	GCB-DLBCL
12	Acalabrutinib	Palbociclib HCl	0	0.0411523	25.467	uM	uM	FARAGE	GCB-DLBCL
12	Acalabrutinib	Palbociclib HCl	1	0	15.9504	uM	uM	FARAGE	GCB-DLBCL
12	Acalabrutinib	Palbociclib HCl	0.333333	0	20.5532	uM	uM	FARAGE	GCB-DLBCL
12	Acalabrutinib	Palbociclib HCl	0.111111	0	19.4584	uM	uM	FARAGE	GCB-DLBCL
12	Acalabrutinib	Palbociclib HCl	0.037037	0	21.8312	uM	uM	FARAGE	GCB-DLBCL
12	Acalabrutinib	Palbociclib HCl	0.0123457	0	15.1602	uM	uM	FARAGE	GCB-DLBCL
12	Acalabrutinib	Palbociclib HCl	0.00411523	0	10.0739	uM	uM	FARAGE	GCB-DLBCL
12	Acalabrutinib	Palbociclib HCl	0	0	4.56162	uM	uM	FARAGE	GCB-DLBCL
13	Acalabrutinib	Prexasertib	1	0.01	78.5259	uM	uM	FARAGE	GCB-DLBCL
13	Acalabrutinib	Prexasertib	0.333333	0.01	62.0658	uM	uM	FARAGE	GCB-DLBCL
13	Acalabrutinib	Prexasertib	0.111111	0.01	44.5917	uM	uM	FARAGE	GCB-DLBCL
13	Acalabrutinib	Prexasertib	0.037037	0.01	22.1038	uM	uM	FARAGE	GCB-DLBCL
13	Acalabrutinib	Prexasertib	0.0123457	0.01	-2.65249	uM	uM	FARAGE	GCB-DLBCL
13	Acalabrutinib	Prexasertib	0.00411523	0.01	3.90986	uM	uM	FARAGE	GCB-DLBCL
13	Acalabrutinib	Prexasertib	0	0.01	46.9815	uM	uM	FARAGE	GCB-DLBCL
13	Acalabrutinib	Prexasertib	1	0.00333333	56.8517	uM	uM	FARAGE	GCB-DLBCL
13	Acalabrutinib	Prexasertib	0.333333	0.00333333	23.4989	uM	uM	FARAGE	GCB-DLBCL
13	Acalabrutinib	Prexasertib	0.111111	0.00333333	11.0814	uM	uM	FARAGE	GCB-DLBCL
13	Acalabrutinib	Prexasertib	0.037037	0.00333333	15.846	uM	uM	FARAGE	GCB-DLBCL
13	Acalabrutinib	Prexasertib	0.0123457	0.00333333	-42.3716	uM	uM	FARAGE	GCB-DLBCL
13	Acalabrutinib	Prexasertib	0.00411523	0.00333333	-29.4876	uM	uM	FARAGE	GCB-DLBCL
13	Acalabrutinib	Prexasertib	0	0.00333333	11.2922	uM	uM	FARAGE	GCB-DLBCL
13	Acalabrutinib	Prexasertib	1	0.00111111	25.6821	uM	uM	FARAGE	GCB-DLBCL
13	Acalabrutinib	Prexasertib	0.333333	0.00111111	24.2572	uM	uM	FARAGE	GCB-DLBCL
13	Acalabrutinib	Prexasertib	0.111111	0.00111111	5.19635	uM	uM	FARAGE	GCB-DLBCL
13	Acalabrutinib	Prexasertib	0.037037	0.00111111	0.131346	uM	uM	FARAGE	GCB-DLBCL
13	Acalabrutinib	Prexasertib	0.0123457	0.00111111	-35.9818	uM	uM	FARAGE	GCB-DLBCL
13	Acalabrutinib	Prexasertib	0.00411523	0.00111111	2.74265	uM	uM	FARAGE	GCB-DLBCL
13	Acalabrutinib	Prexasertib	0	0.00111111	17.5734	uM	uM	FARAGE	GCB-DLBCL
13	Acalabrutinib	Prexasertib	1	0.00037037	29.5543	uM	uM	FARAGE	GCB-DLBCL
13	Acalabrutinib	Prexasertib	0.333333	0.00037037	23.0559	uM	uM	FARAGE	GCB-DLBCL
13	Acalabrutinib	Prexasertib	0.111111	0.00037037	12.304	uM	uM	FARAGE	GCB-DLBCL
13	Acalabrutinib	Prexasertib	0.037037	0.00037037	-96.389	uM	uM	FARAGE	GCB-DLBCL
13	Acalabrutinib	Prexasertib	0.0123457	0.00037037	-47.0149	uM	uM	FARAGE	GCB-DLBCL
13	Acalabrutinib	Prexasertib	0.00411523	0.00037037	5.16653	uM	uM	FARAGE	GCB-DLBCL
13	Acalabrutinib	Prexasertib	0	0.00037037	2.355	uM	uM	FARAGE	GCB-DLBCL
13	Acalabrutinib	Prexasertib	1	0.000123457	21.3221	uM	uM	FARAGE	GCB-DLBCL
13	Acalabrutinib	Prexasertib	0.333333	0.000123457	9.40937	uM	uM	FARAGE	GCB-DLBCL
13	Acalabrutinib	Prexasertib	0.111111	0.000123457	6.40189	uM	uM	FARAGE	GCB-DLBCL
13	Acalabrutinib	Prexasertib	0.037037	0.000123457	-90.7191	uM	uM	FARAGE	GCB-DLBCL
13	Acalabrutinib	Prexasertib	0.0123457	0.000123457	-19.9604	uM	uM	FARAGE	GCB-DLBCL
13	Acalabrutinib	Prexasertib	0.00411523	0.000123457	8.9067	uM	uM	FARAGE	GCB-DLBCL
13	Acalabrutinib	Prexasertib	0	0.000123457	4.95779	uM	uM	FARAGE	GCB-DLBCL
13	Acalabrutinib	Prexasertib	1	4.12e-05	18.1059	uM	uM	FARAGE	GCB-DLBCL
13	Acalabrutinib	Prexasertib	0.333333	4.12e-05	13.3774	uM	uM	FARAGE	GCB-DLBCL
13	Acalabrutinib	Prexasertib	0.111111	4.12e-05	0.71282	uM	uM	FARAGE	GCB-DLBCL
13	Acalabrutinib	Prexasertib	0.037037	4.12e-05	-64.7083	uM	uM	FARAGE	GCB-DLBCL
13	Acalabrutinib	Prexasertib	0.0123457	4.12e-05	2.56374	uM	uM	FARAGE	GCB-DLBCL
13	Acalabrutinib	Prexasertib	0.00411523	4.12e-05	4.29751	uM	uM	FARAGE	GCB-DLBCL
13	Acalabrutinib	Prexasertib	0	4.12e-05	10.5702	uM	uM	FARAGE	GCB-DLBCL
13	Acalabrutinib	Prexasertib	1	0	-0.903805	uM	uM	FARAGE	GCB-DLBCL
13	Acalabrutinib	Prexasertib	0.333333	0	10.9834	uM	uM	FARAGE	GCB-DLBCL
13	Acalabrutinib	Prexasertib	0.111111	0	3.00251	uM	uM	FARAGE	GCB-DLBCL
13	Acalabrutinib	Prexasertib	0.037037	0	-2.34151	uM	uM	FARAGE	GCB-DLBCL
13	Acalabrutinib	Prexasertib	0.0123457	0	1.39227	uM	uM	FARAGE	GCB-DLBCL
13	Acalabrutinib	Prexasertib	0.00411523	0	5.24533	uM	uM	FARAGE	GCB-DLBCL
13	Acalabrutinib	Prexasertib	0	0	5.54992	uM	uM	FARAGE	GCB-DLBCL
14	Acalabrutinib	Saracatinib	1	10	91.5953	uM	uM	FARAGE	GCB-DLBCL
14	Acalabrutinib	Saracatinib	0.333333	10	90.1213	uM	uM	FARAGE	GCB-DLBCL
14	Acalabrutinib	Saracatinib	0.111111	10	91.3929	uM	uM	FARAGE	GCB-DLBCL
14	Acalabrutinib	Saracatinib	0.037037	10	84.7709	uM	uM	FARAGE	GCB-DLBCL
14	Acalabrutinib	Saracatinib	0.0123457	10	86.4898	uM	uM	FARAGE	GCB-DLBCL
14	Acalabrutinib	Saracatinib	0.00411523	10	88.3024	uM	uM	FARAGE	GCB-DLBCL
14	Acalabrutinib	Saracatinib	0	10	91.7422	uM	uM	FARAGE	GCB-DLBCL
14	Acalabrutinib	Saracatinib	1	3.33333	89.3993	uM	uM	FARAGE	GCB-DLBCL
14	Acalabrutinib	Saracatinib	0.333333	3.33333	91.0031	uM	uM	FARAGE	GCB-DLBCL
14	Acalabrutinib	Saracatinib	0.111111	3.33333	89.7976	uM	uM	FARAGE	GCB-DLBCL
14	Acalabrutinib	Saracatinib	0.037037	3.33333	87.9083	uM	uM	FARAGE	GCB-DLBCL
14	Acalabrutinib	Saracatinib	0.0123457	3.33333	77.7506	uM	uM	FARAGE	GCB-DLBCL
14	Acalabrutinib	Saracatinib	0.00411523	3.33333	80.9306	uM	uM	FARAGE	GCB-DLBCL
14	Acalabrutinib	Saracatinib	0	3.33333	90.3918	uM	uM	FARAGE	GCB-DLBCL
14	Acalabrutinib	Saracatinib	1	1.11111	89.6357	uM	uM	FARAGE	GCB-DLBCL
14	Acalabrutinib	Saracatinib	0.333333	1.11111	90.0553	uM	uM	FARAGE	GCB-DLBCL
14	Acalabrutinib	Saracatinib	0.111111	1.11111	86.1533	uM	uM	FARAGE	GCB-DLBCL
14	Acalabrutinib	Saracatinib	0.037037	1.11111	81.838	uM	uM	FARAGE	GCB-DLBCL
14	Acalabrutinib	Saracatinib	0.0123457	1.11111	78.6963	uM	uM	FARAGE	GCB-DLBCL
14	Acalabrutinib	Saracatinib	0.00411523	1.11111	77.429	uM	uM	FARAGE	GCB-DLBCL
14	Acalabrutinib	Saracatinib	0	1.11111	87.2544	uM	uM	FARAGE	GCB-DLBCL
14	Acalabrutinib	Saracatinib	1	0.37037	83.706	uM	uM	FARAGE	GCB-DLBCL
14	Acalabrutinib	Saracatinib	0.333333	0.37037	83.4333	uM	uM	FARAGE	GCB-DLBCL
14	Acalabrutinib	Saracatinib	0.111111	0.37037	73.0179	uM	uM	FARAGE	GCB-DLBCL
14	Acalabrutinib	Saracatinib	0.037037	0.37037	72.6196	uM	uM	FARAGE	GCB-DLBCL
14	Acalabrutinib	Saracatinib	0.0123457	0.37037	72.4173	uM	uM	FARAGE	GCB-DLBCL
14	Acalabrutinib	Saracatinib	0.00411523	0.37037	21.173	uM	uM	FARAGE	GCB-DLBCL
14	Acalabrutinib	Saracatinib	0	0.37037	63.5674	uM	uM	FARAGE	GCB-DLBCL
14	Acalabrutinib	Saracatinib	1	0.123457	71.0392	uM	uM	FARAGE	GCB-DLBCL
14	Acalabrutinib	Saracatinib	0.333333	0.123457	75.2778	uM	uM	FARAGE	GCB-DLBCL
14	Acalabrutinib	Saracatinib	0.111111	0.123457	32.1678	uM	uM	FARAGE	GCB-DLBCL
14	Acalabrutinib	Saracatinib	0.037037	0.123457	40.2466	uM	uM	FARAGE	GCB-DLBCL
14	Acalabrutinib	Saracatinib	0.0123457	0.123457	20.9387	uM	uM	FARAGE	GCB-DLBCL
14	Acalabrutinib	Saracatinib	0.00411523	0.123457	6.78954	uM	uM	FARAGE	GCB-DLBCL
14	Acalabrutinib	Saracatinib	0	0.123457	-46.4228	uM	uM	FARAGE	GCB-DLBCL
14	Acalabrutinib	Saracatinib	1	0.0411523	54.1765	uM	uM	FARAGE	GCB-DLBCL
14	Acalabrutinib	Saracatinib	0.333333	0.0411523	49.2393	uM	uM	FARAGE	GCB-DLBCL
14	Acalabrutinib	Saracatinib	0.111111	0.0411523	17.7012	uM	uM	FARAGE	GCB-DLBCL
14	Acalabrutinib	Saracatinib	0.037037	0.0411523	7.97379	uM	uM	FARAGE	GCB-DLBCL
14	Acalabrutinib	Saracatinib	0.0123457	0.0411523	-54.7572	uM	uM	FARAGE	GCB-DLBCL
14	Acalabrutinib	Saracatinib	0.00411523	0.0411523	-28.5547	uM	uM	FARAGE	GCB-DLBCL
14	Acalabrutinib	Saracatinib	0	0.0411523	-9.1126	uM	uM	FARAGE	GCB-DLBCL
14	Acalabrutinib	Saracatinib	1	0	21.8354	uM	uM	FARAGE	GCB-DLBCL
14	Acalabrutinib	Saracatinib	0.333333	0	9.46262	uM	uM	FARAGE	GCB-DLBCL
14	Acalabrutinib	Saracatinib	0.111111	0	-0.213704	uM	uM	FARAGE	GCB-DLBCL
14	Acalabrutinib	Saracatinib	0.037037	0	-1495.47	uM	uM	FARAGE	GCB-DLBCL
14	Acalabrutinib	Saracatinib	0.0123457	0	-5.70256	uM	uM	FARAGE	GCB-DLBCL
14	Acalabrutinib	Saracatinib	0.00411523	0	0.476397	uM	uM	FARAGE	GCB-DLBCL
14	Acalabrutinib	Saracatinib	0	0	-4.45442	uM	uM	FARAGE	GCB-DLBCL
15	Acalabrutinib	Selumetinib	1	10	41.3478	uM	uM	FARAGE	GCB-DLBCL
15	Acalabrutinib	Selumetinib	0.333333	10	46.5087	uM	uM	FARAGE	GCB-DLBCL
15	Acalabrutinib	Selumetinib	0.111111	10	39.0305	uM	uM	FARAGE	GCB-DLBCL
15	Acalabrutinib	Selumetinib	0.037037	10	48.0188	uM	uM	FARAGE	GCB-DLBCL
15	Acalabrutinib	Selumetinib	0.0123457	10	41.3095	uM	uM	FARAGE	GCB-DLBCL
15	Acalabrutinib	Selumetinib	0.00411523	10	33.6438	uM	uM	FARAGE	GCB-DLBCL
15	Acalabrutinib	Selumetinib	0	10	21.1134	uM	uM	FARAGE	GCB-DLBCL
15	Acalabrutinib	Selumetinib	1	3.33333	11.1453	uM	uM	FARAGE	GCB-DLBCL
15	Acalabrutinib	Selumetinib	0.333333	3.33333	36.4234	uM	uM	FARAGE	GCB-DLBCL
15	Acalabrutinib	Selumetinib	0.111111	3.33333	42.0997	uM	uM	FARAGE	GCB-DLBCL
15	Acalabrutinib	Selumetinib	0.037037	3.33333	39.2285	uM	uM	FARAGE	GCB-DLBCL
15	Acalabrutinib	Selumetinib	0.0123457	3.33333	33.2498	uM	uM	FARAGE	GCB-DLBCL
15	Acalabrutinib	Selumetinib	0.00411523	3.33333	27.3648	uM	uM	FARAGE	GCB-DLBCL
15	Acalabrutinib	Selumetinib	0	3.33333	24.8003	uM	uM	FARAGE	GCB-DLBCL
15	Acalabrutinib	Selumetinib	1	1.11111	25.3264	uM	uM	FARAGE	GCB-DLBCL
15	Acalabrutinib	Selumetinib	0.333333	1.11111	1.95032	uM	uM	FARAGE	GCB-DLBCL
15	Acalabrutinib	Selumetinib	0.111111	1.11111	-55.0703	uM	uM	FARAGE	GCB-DLBCL
15	Acalabrutinib	Selumetinib	0.037037	1.11111	5.49241	uM	uM	FARAGE	GCB-DLBCL
15	Acalabrutinib	Selumetinib	0.0123457	1.11111	35.3116	uM	uM	FARAGE	GCB-DLBCL
15	Acalabrutinib	Selumetinib	0.00411523	1.11111	34.7322	uM	uM	FARAGE	GCB-DLBCL
15	Acalabrutinib	Selumetinib	0	1.11111	34.2402	uM	uM	FARAGE	GCB-DLBCL
15	Acalabrutinib	Selumetinib	1	0.37037	36.236	uM	uM	FARAGE	GCB-DLBCL
15	Acalabrutinib	Selumetinib	0.333333	0.37037	-2.24993	uM	uM	FARAGE	GCB-DLBCL
15	Acalabrutinib	Selumetinib	0.111111	0.37037	-17.6409	uM	uM	FARAGE	GCB-DLBCL
15	Acalabrutinib	Selumetinib	0.037037	0.37037	21.4371	uM	uM	FARAGE	GCB-DLBCL
15	Acalabrutinib	Selumetinib	0.0123457	0.37037	36.4596	uM	uM	FARAGE	GCB-DLBCL
15	Acalabrutinib	Selumetinib	0.00411523	0.37037	40.2062	uM	uM	FARAGE	GCB-DLBCL
15	Acalabrutinib	Selumetinib	0	0.37037	22.5128	uM	uM	FARAGE	GCB-DLBCL
15	Acalabrutinib	Selumetinib	1	0.123457	40.9474	uM	uM	FARAGE	GCB-DLBCL
15	Acalabrutinib	Selumetinib	0.333333	0.123457	26.9792	uM	uM	FARAGE	GCB-DLBCL
15	Acalabrutinib	Selumetinib	0.111111	0.123457	29.2008	uM	uM	FARAGE	GCB-DLBCL
15	Acalabrutinib	Selumetinib	0.037037	0.123457	16.1911	uM	uM	FARAGE	GCB-DLBCL
15	Acalabrutinib	Selumetinib	0.0123457	0.123457	24.2636	uM	uM	FARAGE	GCB-DLBCL
15	Acalabrutinib	Selumetinib	0.00411523	0.123457	40.3894	uM	uM	FARAGE	GCB-DLBCL
15	Acalabrutinib	Selumetinib	0	0.123457	30.7578	uM	uM	FARAGE	GCB-DLBCL
15	Acalabrutinib	Selumetinib	1	0.0411523	39.6077	uM	uM	FARAGE	GCB-DLBCL
15	Acalabrutinib	Selumetinib	0.333333	0.0411523	27.1752	uM	uM	FARAGE	GCB-DLBCL
15	Acalabrutinib	Selumetinib	0.111111	0.0411523	22.8599	uM	uM	FARAGE	GCB-DLBCL
15	Acalabrutinib	Selumetinib	0.037037	0.0411523	15.0516	uM	uM	FARAGE	GCB-DLBCL
15	Acalabrutinib	Selumetinib	0.0123457	0.0411523	16.7449	uM	uM	FARAGE	GCB-DLBCL
15	Acalabrutinib	Selumetinib	0.00411523	0.0411523	22.1145	uM	uM	FARAGE	GCB-DLBCL
15	Acalabrutinib	Selumetinib	0	0.0411523	33.3691	uM	uM	FARAGE	GCB-DLBCL
15	Acalabrutinib	Selumetinib	1	0	10.4488	uM	uM	FARAGE	GCB-DLBCL
15	Acalabrutinib	Selumetinib	0.333333	0	-2.00285	uM	uM	FARAGE	GCB-DLBCL
15	Acalabrutinib	Selumetinib	0.111111	0	-47.3386	uM	uM	FARAGE	GCB-DLBCL
15	Acalabrutinib	Selumetinib	0.037037	0	-44.8935	uM	uM	FARAGE	GCB-DLBCL
15	Acalabrutinib	Selumetinib	0.0123457	0	4.31029	uM	uM	FARAGE	GCB-DLBCL
15	Acalabrutinib	Selumetinib	0.00411523	0	-0.171105	uM	uM	FARAGE	GCB-DLBCL
15	Acalabrutinib	Selumetinib	0	0	0.872566	uM	uM	FARAGE	GCB-DLBCL
16	Acalabrutinib	Silmitasertib	1	10	96.607	uM	uM	FARAGE	GCB-DLBCL
16	Acalabrutinib	Silmitasertib	0.333333	10	96.722	uM	uM	FARAGE	GCB-DLBCL
16	Acalabrutinib	Silmitasertib	0.111111	10	94.8647	uM	uM	FARAGE	GCB-DLBCL
16	Acalabrutinib	Silmitasertib	0.037037	10	94.6432	uM	uM	FARAGE	GCB-DLBCL
16	Acalabrutinib	Silmitasertib	0.0123457	10	94.5687	uM	uM	FARAGE	GCB-DLBCL
16	Acalabrutinib	Silmitasertib	0.00411523	10	94.0511	uM	uM	FARAGE	GCB-DLBCL
16	Acalabrutinib	Silmitasertib	0	10	95.0543	uM	uM	FARAGE	GCB-DLBCL
16	Acalabrutinib	Silmitasertib	1	3.33333	88.3471	uM	uM	FARAGE	GCB-DLBCL
16	Acalabrutinib	Silmitasertib	0.333333	3.33333	86.8732	uM	uM	FARAGE	GCB-DLBCL
16	Acalabrutinib	Silmitasertib	0.111111	3.33333	90.5345	uM	uM	FARAGE	GCB-DLBCL
16	Acalabrutinib	Silmitasertib	0.037037	3.33333	84.2235	uM	uM	FARAGE	GCB-DLBCL
16	Acalabrutinib	Silmitasertib	0.0123457	3.33333	79.1394	uM	uM	FARAGE	GCB-DLBCL
16	Acalabrutinib	Silmitasertib	0.00411523	3.33333	72.7176	uM	uM	FARAGE	GCB-DLBCL
16	Acalabrutinib	Silmitasertib	0	3.33333	76.6899	uM	uM	FARAGE	GCB-DLBCL
16	Acalabrutinib	Silmitasertib	1	1.11111	68.9859	uM	uM	FARAGE	GCB-DLBCL
16	Acalabrutinib	Silmitasertib	0.333333	1.11111	52.7004	uM	uM	FARAGE	GCB-DLBCL
16	Acalabrutinib	Silmitasertib	0.111111	1.11111	68.0147	uM	uM	FARAGE	GCB-DLBCL
16	Acalabrutinib	Silmitasertib	0.037037	1.11111	34.1827	uM	uM	FARAGE	GCB-DLBCL
16	Acalabrutinib	Silmitasertib	0.0123457	1.11111	45.9442	uM	uM	FARAGE	GCB-DLBCL
16	Acalabrutinib	Silmitasertib	0.00411523	1.11111	29.9803	uM	uM	FARAGE	GCB-DLBCL
16	Acalabrutinib	Silmitasertib	0	1.11111	37.5714	uM	uM	FARAGE	GCB-DLBCL
16	Acalabrutinib	Silmitasertib	1	0.37037	50.5982	uM	uM	FARAGE	GCB-DLBCL
16	Acalabrutinib	Silmitasertib	0.333333	0.37037	32.9921	uM	uM	FARAGE	GCB-DLBCL
16	Acalabrutinib	Silmitasertib	0.111111	0.37037	14.6725	uM	uM	FARAGE	GCB-DLBCL
16	Acalabrutinib	Silmitasertib	0.037037	0.37037	18.4659	uM	uM	FARAGE	GCB-DLBCL
16	Acalabrutinib	Silmitasertib	0.0123457	0.37037	18.583	uM	uM	FARAGE	GCB-DLBCL
16	Acalabrutinib	Silmitasertib	0.00411523	0.37037	20.8983	uM	uM	FARAGE	GCB-DLBCL
16	Acalabrutinib	Silmitasertib	0	0.37037	31.3946	uM	uM	FARAGE	GCB-DLBCL
16	Acalabrutinib	Silmitasertib	1	0.123457	27.2817	uM	uM	FARAGE	GCB-DLBCL
16	Acalabrutinib	Silmitasertib	0.333333	0.123457	14.5191	uM	uM	FARAGE	GCB-DLBCL
16	Acalabrutinib	Silmitasertib	0.111111	0.123457	3.16225	uM	uM	FARAGE	GCB-DLBCL
16	Acalabrutinib	Silmitasertib	0.037037	0.123457	6.67026	uM	uM	FARAGE	GCB-DLBCL
16	Acalabrutinib	Silmitasertib	0.0123457	0.123457	6.59785	uM	uM	FARAGE	GCB-DLBCL
16	Acalabrutinib	Silmitasertib	0.00411523	0.123457	21.0197	uM	uM	FARAGE	GCB-DLBCL
16	Acalabrutinib	Silmitasertib	0	0.123457	25.7247	uM	uM	FARAGE	GCB-DLBCL
16	Acalabrutinib	Silmitasertib	1	0.0411523	33.2732	uM	uM	FARAGE	GCB-DLBCL
16	Acalabrutinib	Silmitasertib	0.333333	0.0411523	6.59359	uM	uM	FARAGE	GCB-DLBCL
16	Acalabrutinib	Silmitasertib	0.111111	0.0411523	1.59675	uM	uM	FARAGE	GCB-DLBCL
16	Acalabrutinib	Silmitasertib	0.037037	0.0411523	17.6863	uM	uM	FARAGE	GCB-DLBCL
16	Acalabrutinib	Silmitasertib	0.0123457	0.0411523	17.5457	uM	uM	FARAGE	GCB-DLBCL
16	Acalabrutinib	Silmitasertib	0.00411523	0.0411523	17.3604	uM	uM	FARAGE	GCB-DLBCL
16	Acalabrutinib	Silmitasertib	0	0.0411523	7.00253	uM	uM	FARAGE	GCB-DLBCL
16	Acalabrutinib	Silmitasertib	1	0	22.7385	uM	uM	FARAGE	GCB-DLBCL
16	Acalabrutinib	Silmitasertib	0.333333	0	25.746	uM	uM	FARAGE	GCB-DLBCL
16	Acalabrutinib	Silmitasertib	0.111111	0	15.1559	uM	uM	FARAGE	GCB-DLBCL
16	Acalabrutinib	Silmitasertib	0.037037	0	1.84808	uM	uM	FARAGE	GCB-DLBCL
16	Acalabrutinib	Silmitasertib	0.0123457	0	3.48813	uM	uM	FARAGE	GCB-DLBCL
16	Acalabrutinib	Silmitasertib	0.00411523	0	6.51052	uM	uM	FARAGE	GCB-DLBCL
16	Acalabrutinib	Silmitasertib	0	0	6.26771	uM	uM	FARAGE	GCB-DLBCL
17	Acalabrutinib	Vandetanib	1	10	92.1426	uM	uM	FARAGE	GCB-DLBCL
17	Acalabrutinib	Vandetanib	0.333333	10	91.4781	uM	uM	FARAGE	GCB-DLBCL
17	Acalabrutinib	Vandetanib	0.111111	10	93.3503	uM	uM	FARAGE	GCB-DLBCL
17	Acalabrutinib	Vandetanib	0.037037	10	89.0095	uM	uM	FARAGE	GCB-DLBCL
17	Acalabrutinib	Vandetanib	0.0123457	10	92.279	uM	uM	FARAGE	GCB-DLBCL
17	Acalabrutinib	Vandetanib	0.00411523	10	85.5824	uM	uM	FARAGE	GCB-DLBCL
17	Acalabrutinib	Vandetanib	0	10	84.7262	uM	uM	FARAGE	GCB-DLBCL
17	Acalabrutinib	Vandetanib	1	3.33333	83.4397	uM	uM	FARAGE	GCB-DLBCL
17	Acalabrutinib	Vandetanib	0.333333	3.33333	65.2394	uM	uM	FARAGE	GCB-DLBCL
17	Acalabrutinib	Vandetanib	0.111111	3.33333	75.3545	uM	uM	FARAGE	GCB-DLBCL
17	Acalabrutinib	Vandetanib	0.037037	3.33333	82.1085	uM	uM	FARAGE	GCB-DLBCL
17	Acalabrutinib	Vandetanib	0.0123457	3.33333	78.9754	uM	uM	FARAGE	GCB-DLBCL
17	Acalabrutinib	Vandetanib	0.00411523	3.33333	77.3183	uM	uM	FARAGE	GCB-DLBCL
17	Acalabrutinib	Vandetanib	0	3.33333	65.2436	uM	uM	FARAGE	GCB-DLBCL
17	Acalabrutinib	Vandetanib	1	1.11111	74.5323	uM	uM	FARAGE	GCB-DLBCL
17	Acalabrutinib	Vandetanib	0.333333	1.11111	38.4767	uM	uM	FARAGE	GCB-DLBCL
17	Acalabrutinib	Vandetanib	0.111111	1.11111	-36.5398	uM	uM	FARAGE	GCB-DLBCL
17	Acalabrutinib	Vandetanib	0.037037	1.11111	31.3456	uM	uM	FARAGE	GCB-DLBCL
17	Acalabrutinib	Vandetanib	0.0123457	1.11111	21.0708	uM	uM	FARAGE	GCB-DLBCL
17	Acalabrutinib	Vandetanib	0.00411523	1.11111	0.114307	uM	uM	FARAGE	GCB-DLBCL
17	Acalabrutinib	Vandetanib	0	1.11111	7.43065	uM	uM	FARAGE	GCB-DLBCL
17	Acalabrutinib	Vandetanib	1	0.37037	48.875	uM	uM	FARAGE	GCB-DLBCL
17	Acalabrutinib	Vandetanib	0.333333	0.37037	1.41783	uM	uM	FARAGE	GCB-DLBCL
17	Acalabrutinib	Vandetanib	0.111111	0.37037	2.43168	uM	uM	FARAGE	GCB-DLBCL
17	Acalabrutinib	Vandetanib	0.037037	0.37037	-39.9818	uM	uM	FARAGE	GCB-DLBCL
17	Acalabrutinib	Vandetanib	0.0123457	0.37037	-41.4025	uM	uM	FARAGE	GCB-DLBCL
17	Acalabrutinib	Vandetanib	0.00411523	0.37037	22.8855	uM	uM	FARAGE	GCB-DLBCL
17	Acalabrutinib	Vandetanib	0	0.37037	9.44984	uM	uM	FARAGE	GCB-DLBCL
17	Acalabrutinib	Vandetanib	1	0.123457	10.3657	uM	uM	FARAGE	GCB-DLBCL
17	Acalabrutinib	Vandetanib	0.333333	0.123457	9.73099	uM	uM	FARAGE	GCB-DLBCL
17	Acalabrutinib	Vandetanib	0.111111	0.123457	26.926	uM	uM	FARAGE	GCB-DLBCL
17	Acalabrutinib	Vandetanib	0.037037	0.123457	5.11328	uM	uM	FARAGE	GCB-DLBCL
17	Acalabrutinib	Vandetanib	0.0123457	0.123457	9.47966	uM	uM	FARAGE	GCB-DLBCL
17	Acalabrutinib	Vandetanib	0.00411523	0.123457	4.74054	uM	uM	FARAGE	GCB-DLBCL
17	Acalabrutinib	Vandetanib	0	0.123457	9.08349	uM	uM	FARAGE	GCB-DLBCL
17	Acalabrutinib	Vandetanib	1	0.0411523	16.9025	uM	uM	FARAGE	GCB-DLBCL
17	Acalabrutinib	Vandetanib	0.333333	0.0411523	11.0473	uM	uM	FARAGE	GCB-DLBCL
17	Acalabrutinib	Vandetanib	0.111111	0.0411523	8.33162	uM	uM	FARAGE	GCB-DLBCL
17	Acalabrutinib	Vandetanib	0.037037	0.0411523	20.123	uM	uM	FARAGE	GCB-DLBCL
[truncated: 42,101 more rows]

## Sheet: calculated synergy scores
block_id	drug1	drug2	conc_unit1	conc_unit2	input_type	replicate	response_p_value	response_origin_p_value	ZIP_synergy_p_value	HSA_synergy_p_value	Bliss_synergy_p_value	Loewe_synergy_p_value	ZIP_synergy	HSA_synergy	Bliss_synergy	Loewe_synergy	ic50_1	ic50_2	ri_1	ri_2	css1_ic502	css2_ic501	css	Cells
1	Acalabrutinib	Adavosertib	uM	uM	inhibition	TRUE	0.812	0.113	0.086	0.197	0.339	0.952	-4.6059	1.08542	-2.54083	0.0925653	0.473692	0.00347822	5.2742	18.3422	19.3774	25.6274	22.5024	FARAGE
2	Acalabrutinib	AZD2461	uM	uM	inhibition	TRUE	2.97e-69	6.06e-68	0.968	0.0519	0.872	0.305	-0.240697	2.2641	-0.923148	1.46496	0.473577	5.23651	5.406	22.7045	39.8341	27.9003	33.8672	FARAGE
3	Acalabrutinib	AZD3463	uM	uM	inhibition	TRUE	1.73e-275	1.55e-292	0.465	0.00645	0.183	0.622	0.865235	2.73327	2.17369	3.988	0.562773	4.33336	1.1374	26.0277	65.7856	34.4979	50.1418	FARAGE
4	Acalabrutinib	AZD4573	uM	uM	inhibition	TRUE	< 2e-324	1.91e-168	0.587	0.628	0.806	0.382	1.09002	1.07362	0.704292	1.75443	0.205565	0.00207954	2.0251	26.8249	39.5353	31.5307	35.533	FARAGE
5	Acalabrutinib	AZD7648	uM	uM	inhibition	TRUE	4.21e-101	1.25e-183	4.94e-06	1.54e-08	0.00769	0.00184	6.55617	6.34213	5.51003	5.26648	0.819943	4.08052	2.0059	12.3681	45.3091	31.0539	38.1815	FARAGE
6	Acalabrutinib	AZD8055	uM	uM	inhibition	TRUE	0.000997	6.47e-05	0.000784	1.03e-17	2.97e-08	2.84e-07	-4.90265	-8.23563	-8.13138	-9.01163	0.858389	0.00458543	0.7506	5.1425	7.6932	5.2976	6.4954	FARAGE
7	Acalabrutinib	Capivasertib	uM	uM	inhibition	TRUE	< 2e-324	< 2e-324	0.713	0.454	0.924	0.651	0.457429	1.23262	-0.184359	0.703708	0.32023	0.153898	4.0072	70.8524	57.1401	75.906	66.523	FARAGE
8	Acalabrutinib	Daporinad	uM	uM	inhibition	TRUE	1.24e-92	3.13e-98	0.381	0.199	0.691	0.643	-1.90209	-2.33866	-1.23312	-6.85979	0.551648	0.00311413	3.1308	21.857	50.1366	26.3458	38.2412	FARAGE
9	Acalabrutinib	Doxorubicin HCl	uM	uM	inhibition	TRUE	2.15e-146	5.74e-107	0.00287	0.000697	0.00802	0.157	5.05574	5.51363	4.85314	2.90849	0.630331	0.00467892	2.6738	11.1979	41.4182	30.8079	36.1131	FARAGE
10	Acalabrutinib	Fexagratinib	uM	uM	inhibition	TRUE	4.71e-38	3.47e-76	0.373	0.156	0.366	0.111	-1.62686	-2.72952	-2.26387	-3.4256	0.306499	4.26725	3.0595	9.5066	28.1642	20.3243	24.2443	FARAGE
11	Acalabrutinib	Lapatinib	uM	uM	inhibition	TRUE	2.68e-88	1.08e-65	0.246	0.00469	0.55	0.00115	2.95514	3.29892	2.02141	4.13001	0.124621	7.64951	6.7539	4.1359	43.3497	11.5275	27.4386	FARAGE
12	Acalabrutinib	Palbociclib HCl	uM	uM	inhibition	TRUE	1.74e-144	9.93e-78	1.19e-09	1.52e-07	6.91e-09	3.99e-07	-14.301	-13.1567	-15.2057	-12.8312	0.374708	6.14592	3.0915	34.3477	55.7958	19.0273	37.4115	FARAGE
13	Acalabrutinib	Prexasertib	uM	uM	inhibition	TRUE	3.76e-09	0.000432	0.885	0.452	0.358	0.484	-0.348942	-2.05289	-2.57808	-2.59536	0.207459	0.00744193	0.9375	12.0548	35.2069	12.5939	23.9004	FARAGE
14	Acalabrutinib	Saracatinib	uM	uM	inhibition	TRUE	< 2e-324	< 2e-324	0.254	0.0143	0.264	0.014	3.56891	6.38362	4.0483	6.00158	0.170192	0.271427	11.4965	63.2501	68.3922	73.1367	70.7644	FARAGE
15	Acalabrutinib	Selumetinib	uM	uM	inhibition	TRUE	7.77e-152	6.7e-57	0.00476	0.0635	0.0151	0.0263	-6.09012	-1.95682	-4.65479	-2.28735	0.46034	2.01371	3.2971	39.7333	26.3559	37.0677	31.7118	FARAGE
16	Acalabrutinib	Silmitasertib	uM	uM	inhibition	TRUE	< 2e-324	< 2e-324	0.00367	0.0399	0.000457	0.0309	-5.49203	-3.24208	-6.60106	-3.24465	0.0790246	1.94001	7.1443	45.6979	65.5679	44.0942	54.831	FARAGE
17	Acalabrutinib	Vandetanib	uM	uM	inhibition	TRUE	2.33e-222	< 2e-324	0.589	0.0115	0.164	0.0376	-0.844767	3.48433	-2.93595	3.20423	0.0683404	2.0245	16.658	31.7021	62.7162	37.3389	50.0275	FARAGE
18	Acalabrutinib	Vorinostat	uM	uM	inhibition	TRUE	< 2e-324	< 2e-324	0.0287	0.039	0.00162	0.0547	-3.79148	-3.50248	-5.46005	-3.3757	0.193488	0.340756	5.1104	64.683	44.7985	66.8839	55.8412	FARAGE
19	Acalabrutinib	Saruparib	uM	uM	inhibition	TRUE	< 2e-324	< 2e-324	0.00146	0.715	0.00066	0.85	-4.47079	0.580659	-4.70956	0.290507	0.330208	1.43483	10.3113	54.8294	55.265	60.8014	58.0332	FARAGE
20	Acalabrutinib	Venetoclax	uM	uM	inhibition	TRUE	9.24e-98	4.93e-67	2.91e-07	1.52e-05	6.09e-10	4.22e-05	-22.7335	-18.462	-23.4743	-18.2145	0.0972827	0.128799	9.7677	49.0752	24.8171	32.7998	28.8085	FARAGE
21	Acalabrutinib	Alisertib	uM	uM	inhibition	TRUE	2.35e-10	1.96e-62	0.101	0.0489	0.0821	0.0705	-5.25737	-4.5433	-7.57684	-3.20013	0.572508	0.00511499	6.3563	10.3673	8.6761	18.4045	13.5403	FARAGE
22	Acalabrutinib	Olaparib	uM	uM	inhibition	TRUE	< 2e-324	< 2e-324	1.39e-37	2.66e-21	3.59e-28	1.53e-28	-17.1065	-14.3885	-16.9034	-14.605	0.350408	0.407654	5.8827	54.6496	29.2846	39.6507	34.4676	FARAGE
23	Acalabrutinib	AZD8186	uM	uM	inhibition	TRUE	1.12e-186	2.04e-297	0.0216	0.655	0.00646	0.857	-7.09874	0.623804	-7.54992	0.288632	0.90841	0.679611	14.7067	36.019	58.4061	42.1075	50.2568	FARAGE
24	Acalabrutinib	Ceralasertib	uM	uM	inhibition	TRUE	< 2e-324	< 2e-324	1.12e-06	7.18e-06	1.17e-10	1.2e-05	-10.8153	-7.38354	-12.878	-7.84536	0.658151	0.407195	13.3742	52.2369	26.6929	55.2059	40.9494	FARAGE
25	Acalabrutinib	AZD1480	uM	uM	inhibition	TRUE	< 2e-324	< 2e-324	2.51e-06	4.88e-23	0.0126	2.62e-21	6.5149	9.9522	5.06907	8.58797	0.589281	7.70929	14.5251	13.498	77.4874	37.1918	57.3396	FARAGE
26	Acalabrutinib	AZD1208	uM	uM	inhibition	TRUE	< 2e-324	< 2e-324	0.0549	0.000608	0.0809	0.00166	3.57161	6.3561	3.66306	6.17208	0.700035	2.95559	3.0401	35.1699	47.6589	46.0753	46.8671	FARAGE
27	Acalabrutinib	Crizotinib	uM	uM	inhibition	TRUE	< 2e-324	< 2e-324	1.78e-189	2.81e-221	< 2e-324	1.34e-211	-31.3904	-30.1191	-32.136	-30.1346	0.384934	0.0245657	9.7929	81.67	9.6035	50.9205	30.262	FARAGE
28	Acalabrutinib	AZD4320	uM	uM	inhibition	TRUE	< 2e-324	< 2e-324	1.86e-07	1.01e-14	1.91e-17	2.89e-16	-6.45577	-7.86532	-8.63106	-7.8924	0.236752	0.0169685	6.8017	88.9147	59.5437	89.8058	74.6748	FARAGE
29	Acalabrutinib	Taselisib	uM	uM	inhibition	TRUE	< 2e-324	< 2e-324	0.676	6.08e-05	0.639	0.00117	0.983006	6.01353	1.34653	5.517	0.469706	0.00350399	14.9497	7.7767	24.0062	26.4163	25.2112	FARAGE
30	Acalabrutinib	AZD5991	uM	uM	inhibition	TRUE	< 2e-324	< 2e-324	0.405	0.226	0.273	0.22	-2.09733	2.10161	-3.79969	1.68914	0.547859	0.0556783	11.1765	31.7456	76.2054	39.7139	57.9597	FARAGE
20	Acalabrutinib	Venetoclax	uM	uM	inhibition	TRUE	< 2e-324	< 2e-324	1.98e-102	2.05e-212	2.85e-132	7.47e-45	47.3637	56.3437	49.406	47.324	0.111456	0.0707316	20.4627	29.1217	88.0278	91.2351	89.6315	Jeko-1
26	Acalabrutinib	AZD1208	uM	uM	inhibition	TRUE	< 2e-324	< 2e-324	1.25e-07	5.28e-103	1.16e-08	5.46e-93	14.8763	31.02	15.3495	29.4573	0.109593	0.0628081	32.4036	30.268	66.0455	57.8825	61.964	Jeko-1
19	Acalabrutinib	Saruparib	uM	uM	inhibition	TRUE	< 2e-324	< 2e-324	3.95e-16	3.86e-93	3.81e-16	3.98e-05	24.401	29.8699	23.9721	22.4351	0.531415	0.176077	11.8547	18.435	43.244	60.8507	52.0474	Jeko-1
15	Acalabrutinib	Selumetinib	uM	uM	inhibition	TRUE	< 2e-324	8.48e-232	0.0445	1.6e-25	0.0483	1.81e-05	8.83058	16.7701	9.42788	17.6233	0.578058	1.12661	17.2378	23.6587	43.6244	55.122	49.3732	Jeko-1
23	Acalabrutinib	AZD8186	uM	uM	inhibition	TRUE	< 2e-324	< 2e-324	0.174	1.99e-18	0.0971	4.53e-12	2.43457	15.0292	2.79069	15.041	0.37965	1.80091	44.2466	63.3365	87.8759	82.2041	85.04	Jeko-1
13	Acalabrutinib	Prexasertib	uM	uM	inhibition	TRUE	< 2e-324	< 2e-324	3.89e-21	1.04e-15	5.94e-19	8e-33	11.9241	13.3672	12.209	12.5681	0.152401	0.00238344	19.8262	26.708	82.1209	59.3542	70.7375	Jeko-1
21	Acalabrutinib	Alisertib	uM	uM	inhibition	TRUE	3.51e-216	< 2e-324	0.655	5.27e-07	0.904	1.06e-07	2.08376	9.18449	0.621405	10.8578	0.470107	0.00462057	32.7665	15.9415	45.1489	46.8335	45.9912	Jeko-1
25	Acalabrutinib	AZD1480	uM	uM	inhibition	TRUE	< 2e-324	< 2e-324	6.23e-06	2.3e-20	0.000102	3.12e-05	6.18699	12.1395	6.12687	10.7811	0.313305	0.665817	37.3994	9.2619	66.7491	52.9534	59.8513	Jeko-1
5	Acalabrutinib	AZD7648	uM	uM	inhibition	TRUE	< 2e-324	< 2e-324	0.255	2.66e-58	0.361	1.77e-37	1.36147	8.93807	1.34094	8.09789	0.132487	5.14411	41.8764	29.3086	88.838	57.9318	73.3849	Jeko-1
16	Acalabrutinib	Silmitasertib	uM	uM	inhibition	TRUE	< 2e-324	< 2e-324	0.00206	9.99e-14	0.0601	4.79e-11	4.98847	9.08862	4.49227	8.00886	0.0437831	1.04797	32.3963	44.6084	78.2817	68.8513	73.5665	Jeko-1
27	Acalabrutinib	Crizotinib	uM	uM	inhibition	TRUE	< 2e-324	< 2e-324	0.411	6.54e-11	0.584	0.000989	2.94122	10.2932	2.50577	7.91078	0.673802	1	35.0409	22.3734	93.6606	56.7062	75.1834	Jeko-1
12	Acalabrutinib	Palbociclib HCl	uM	uM	inhibition	TRUE	< 2e-324	< 2e-324	0.934	3.93e-12	0.628	2.13e-11	-0.0443053	6.61579	-0.340357	6.53108	0.00343449	0.0438083	41.9917	84.8274	75.8033	94.8944	85.3488	Jeko-1
14	Acalabrutinib	Saracatinib	uM	uM	inhibition	TRUE	< 2e-324	< 2e-324	0.1	9.66e-16	0.032	7.7e-14	2.41069	7.30479	3.85683	5.92545	0.319973	0.846009	18.8205	44.1453	60.5643	62.1641	61.3642	Jeko-1
28	Acalabrutinib	AZD4320	uM	uM	inhibition	TRUE	< 2e-324	< 2e-324	0.211	1.98e-05	0.0739	0.115	-5.4875	4.32458	-6.14815	4.99735	0.102591	0.00615135	43.9298	19.3337	46.6906	39.6002	43.1454	Jeko-1
3	Acalabrutinib	AZD3463	uM	uM	inhibition	TRUE	< 2e-324	< 2e-324	0.445	9.76e-10	0.749	5.94e-06	0.724705	5.26664	0.39072	4.27762	0.229697	0.613439	44.3982	53.6827	77.0562	73.1068	75.0815	Jeko-1
30	Acalabrutinib	AZD5991	uM	uM	inhibition	TRUE	< 2e-324	< 2e-324	0.727	3.53e-05	0.731	6.58e-05	-0.688393	3.46323	-0.885403	2.79726	0.00274433	0.0526121	47.4307	54.4597	78.3118	64.2431	71.2775	Jeko-1
10	Acalabrutinib	Fexagratinib	uM	uM	inhibition	TRUE	< 2e-324	< 2e-324	0.421	0.000446	0.298	0.0134	-1.28556	3.94843	-1.90969	2.69514	0.023006	1.74477	37.5743	35.0032	70.4151	56.7363	63.5757	Jeko-1
7	Acalabrutinib	Capivasertib	uM	uM	inhibition	TRUE	< 2e-324	< 2e-324	0.202	0.018	0.14	0.00905	-2.94757	3.10526	-3.08232	2.38884	0.126855	0.134907	35.729	77.6751	62.0473	81.6048	71.826	Jeko-1
17	Acalabrutinib	Vandetanib	uM	uM	inhibition	TRUE	< 2e-324	< 2e-324	0.106	0.000132	0.1	0.00306	-3.87375	3.11285	-4.27972	2.32105	0.0149416	2.69526	47.757	40.8186	70.5754	58.7787	64.677	Jeko-1
29	Acalabrutinib	Taselisib	uM	uM	inhibition	TRUE	< 2e-324	< 2e-324	0.00659	0.0382	0.00171	0.147	-6.60374	2.67462	-7.23648	2.07466	0.00332196	0.00795795	47.5607	17.8344	60.6557	34.9468	47.8013	Jeko-1
8	Acalabrutinib	Daporinad	uM	uM	inhibition	TRUE	< 2e-324	< 2e-324	0.203	0.0135	0.11	0.291	2.26816	4.15265	2.95934	1.89868	0.217345	0.000441358	36.5165	55.4998	76.3787	73.1159	74.7473	Jeko-1
6	Acalabrutinib	AZD8055	uM	uM	inhibition	TRUE	< 2e-324	< 2e-324	0.0152	0.00073	0.0179	0.00266	-3.25696	1.84804	-3.55827	1.59587	0.00697293	0.00728047	37.2162	7.5896	43.1731	27.9545	35.5638	Jeko-1
9	Acalabrutinib	Doxorubicin HCl	uM	uM	inhibition	TRUE	< 2e-324	< 2e-324	0.183	0.537	0.221	0.524	-2.86899	0.968419	-3.22636	0.945772	0.00500729	0.00718473	44.4168	7.4382	41.9265	33.489	37.7077	Jeko-1
22	Acalabrutinib	Olaparib	uM	uM	inhibition	TRUE	< 2e-324	< 2e-324	0.0425	0.264	0.0254	0.824	-6.64261	3.03351	-7.33173	0.761671	0.0411262	7.91977	39.2658	29.3237	67.8161	49.4011	58.6086	Jeko-1
18	Acalabrutinib	Vorinostat	uM	uM	inhibition	TRUE	< 2e-324	< 2e-324	3.48e-10	0.976	9.01e-12	0.0333	-4.42544	-0.016968	-5.25281	-0.968153	0.00831407	0.156697	43.324	78.7117	62.0063	81.5918	71.799	Jeko-1
24	Acalabrutinib	Ceralasertib	uM	uM	inhibition	TRUE	< 2e-324	< 2e-324	0.000354	0.839	4.68e-05	0.551	-7.73027	-0.376902	-9.84931	-1.13234	0.00438086	0.549045	43.4641	40.1567	79.8134	46.5442	63.1788	Jeko-1
11	Acalabrutinib	Lapatinib	uM	uM	inhibition	TRUE	< 2e-324	< 2e-324	0.00418	0.942	0.0136	0.295	-4.78544	-0.119564	-5.33196	-1.4107	0.0172077	6.22778	46.0173	21.9018	67.3288	42.8629	55.0958	Jeko-1
2	Acalabrutinib	AZD2461	uM	uM	inhibition	TRUE	< 2e-324	< 2e-324	4.66e-06	0.0149	5.47e-07	0.00348	-9.75597	-1.33125	-11.1824	-1.91954	0.00128912	6.21621	48.1801	34.3905	73.5383	44.8642	59.2013	Jeko-1
1	Acalabrutinib	Adavosertib	uM	uM	inhibition	TRUE	< 2e-324	< 2e-324	0.0181	2.34e-06	0.0272	7.02e-06	-4.87724	-2.5446	-5.12707	-2.56422	0.0977394	0.00463303	46.8153	5.123	44.8574	35.7222	40.2898	Jeko-1
4	Acalabrutinib	AZD4573	uM	uM	inhibition	TRUE	< 2e-324	< 2e-324	6.67e-34	8.98e-25	6.46e-21	2.53e-32	-8.35795	-6.69603	-8.68487	-7.5251	0.174379	0.00186694	38.7949	30.5585	46.6057	46.9333	46.7695	Jeko-1
1	Acalabrutinib	AZD1208	uM	uM	inhibition	TRUE	< 2e-324	< 2e-324	7.56e-05	1.56e-63	0.000201	1.29e-61	5.88477	18.2172	5.89073	17.7329	0.0505606	1.78518	23.9205	42.1053	65.6929	60.0468	62.8698	KARPAS-1718
2	Acalabrutinib	AZD2461	uM	uM	inhibition	TRUE	< 2e-324	< 2e-324	0.134	2.17e-18	0.113	2.56e-17	4.69983	11.6106	5.23362	11.4201	0.32751	2.02295	19.1105	36.1908	68.5488	54.7452	61.647	KARPAS-1718
3	Acalabrutinib	AZD3463	uM	uM	inhibition	TRUE	< 2e-324	< 2e-324	2.08e-82	< 2e-324	2.58e-76	1.96e-263	12.0744	19.9766	11.6999	18.8713	0.15904	0.537603	23.3461	52.0779	80.5628	76.6672	78.615	KARPAS-1718
4	Acalabrutinib	AZD4573	uM	uM	inhibition	TRUE	< 2e-324	< 2e-324	3.19e-13	2.49e-09	4.09e-11	1.16e-11	-5.70521	-3.66914	-6.10128	-4.13735	0.0122878	0.00855694	31.5375	1.4644	42.3995	19.6534	31.0265	KARPAS-1718
5	Acalabrutinib	AZD7648	uM	uM	inhibition	TRUE	< 2e-324	< 2e-324	0.073	4.89e-11	2.43e-05	0.309	-4.85341	2.62028	-6.51971	5.84997	0.308199	1.14323	27.7056	25.6298	39.1949	38.3725	38.7837	KARPAS-1718
6	Acalabrutinib	AZD8186	uM	uM	inhibition	TRUE	< 2e-324	< 2e-324	3.46e-06	0.000939	1.73e-06	0.00169	-8.84749	3.5835	-8.96128	3.28394	0.0350606	0.356998	25.2859	49.9201	46.883	51.865	49.374	KARPAS-1718
7	Acalabrutinib	Capivasertib	uM	uM	inhibition	TRUE	< 2e-324	< 2e-324	0.321	1.22e-06	0.402	2.39e-05	-2.7576	6.09824	-2.50989	5.76537	0.333373	0.411086	23.8213	58.6494	60.0826	66.9951	63.5388	KARPAS-1718
8	Acalabrutinib	Crizotinib	uM	uM	inhibition	TRUE	< 2e-324	< 2e-324	4.42e-21	3.1e-56	3.91e-22	9.84e-10	27.5415	31.1273	27.6456	33.577	0.508774	2.37961	29.9811	27.6325	94.4316	78.4572	86.4444	KARPAS-1718
9	Acalabrutinib	Daporinad	uM	uM	inhibition	TRUE	< 2e-324	< 2e-324	0.417	9.47e-09	0.492	0.118	4.04194	8.03131	3.26599	11.3181	0.484989	0.00377174	26.7966	25.4227	78.3202	50.4072	64.3637	KARPAS-1718
10	Acalabrutinib	Doxorubicin HCl	uM	uM	inhibition	TRUE	1.78e-277	< 2e-324	0.00572	0.0356	0.00607	0.0416	-3.77644	-1.91026	-4.15638	-1.91068	0.00920804	0.00482989	32.1334	3.3861	28.2923	20.0469	24.1696	KARPAS-1718
11	Acalabrutinib	Fexagratinib	uM	uM	inhibition	TRUE	< 2e-324	< 2e-324	0.855	3.05e-06	0.385	0.15	0.534828	2.78758	-1.84893	10.1932	0.601243	1.69826	26.3915	31.3323	51.8201	51.9123	51.8662	KARPAS-1718
12	Acalabrutinib	Lapatinib	uM	uM	inhibition	TRUE	< 2e-324	1.51e-303	0.609	1.87e-06	0.331	0.396	-1.76748	5.27173	-2.62026	6.09462	0.102168	5.73555	32.2371	16.0118	54.3509	29.7137	42.0323	KARPAS-1718
13	Acalabrutinib	Olaparib	uM	uM	inhibition	TRUE	3.79e-192	1.82e-146	0.559	5.43e-05	0.628	7.75e-05	1.45934	4.37428	1.54966	3.51953	0.155759	3.68122	17.6623	16.075	47.5112	30.9387	39.2249	KARPAS-1718
14	Acalabrutinib	Palbociclib HCl	uM	uM	inhibition	TRUE	2.08e-297	5.7e-228	6.04e-06	3.72e-27	1.16e-05	1.98e-17	28.9977	34.1828	30.4919	27.2059	0.519833	0.264895	15.186	7.6678	37.2251	63.5336	50.3794	KARPAS-1718
15	Acalabrutinib	Prexasertib	uM	uM	inhibition	TRUE	< 2e-324	< 2e-324	1.18e-26	9.77e-73	3.13e-21	3.05e-16	14.8746	17.9706	15.7665	16.562	0.244606	0.00263829	19.4445	25.0177	94.1709	62.2074	78.1891	KARPAS-1718
16	Acalabrutinib	Saracatinib	uM	uM	inhibition	TRUE	< 2e-324	< 2e-324	0.866	3.21e-07	0.93	0.445	0.362379	4.90894	0.231856	1.91981	0.053871	8.96866	22.5735	10.7108	61.7229	33.5184	47.6206	KARPAS-1718
17	Acalabrutinib	Saruparib	uM	uM	inhibition	TRUE	< 2e-324	< 2e-324	0.208	3.63e-25	0.175	4.2e-26	-3.83007	8.7612	-4.0351	8.35022	0.130757	8.55368	25.1564	26.2037	65.8577	37.2032	51.5305	KARPAS-1718
18	Acalabrutinib	Selumetinib	uM	uM	inhibition	TRUE	< 2e-324	< 2e-324	0.00879	0.00308	0.00746	0.00243	-8.55	3.51505	-9.23738	4.20176	0.159278	1.85317	22.0497	20.0331	27.3109	26.582	26.9464	KARPAS-1718
19	Acalabrutinib	Silmitasertib	uM	uM	inhibition	TRUE	< 2e-324	< 2e-324	0.219	1.26e-11	0.231	4.75e-09	5.92762	14.995	5.82006	14.7191	0.167589	5.64361	24.6465	45.1835	94.7012	64.5084	79.6048	KARPAS-1718
20	Acalabrutinib	Vandetanib	uM	uM	inhibition	TRUE	< 2e-324	< 2e-324	0.00378	7.12e-26	0.00258	1.95e-05	7.35178	13.9264	8.46522	14.2356	0.196871	0.927234	26.1848	45.9851	77.8649	67.3383	72.6016	KARPAS-1718
21	Acalabrutinib	Vorinostat	uM	uM	inhibition	TRUE	< 2e-324	< 2e-324	0.189	5.69e-17	0.385	5.61e-05	3.63846	9.79941	2.02353	11.9486	0.617962	0.0716461	25.4444	54.0145	74.0612	69.1331	71.5971	KARPAS-1718
22	Acalabrutinib	AZD1480	uM	uM	inhibition	TRUE	< 2e-324	< 2e-324	2.04e-07	3.7e-44	9.47e-06	3.3e-37	7.11149	11.9478	7.50411	11.1674	0.00380993	0.596284	33.3389	52.0573	84.59	71.3942	77.9921	KARPAS-1718
23	Acalabrutinib	Ceralasertib	uM	uM	inhibition	TRUE	< 2e-324	< 2e-324	0.652	1.66e-09	0.676	0.000116	0.694397	5.95813	0.678183	5.88288	0.102257	0.0473487	27.9122	75.2892	68.117	77.7447	72.9309	KARPAS-1718
24	Acalabrutinib	AZD8055	uM	uM	inhibition	TRUE	< 2e-324	< 2e-324	3.14e-06	5.06e-58	4.81e-07	8.76e-49	-4.88952	8.9495	-4.92672	8.38092	0.0138269	0.0694854	27.8189	28.8708	52.6398	38.8346	45.7372	KARPAS-1718
25	Acalabrutinib	Adavosertib	uM	uM	inhibition	TRUE	4.09e-62	1.46e-78	0.184	0.343	0.0475	0.842	-3.20619	-1.93326	-5.03376	-0.740457	0.461375	0.0026611	22.6407	4.0888	22.0087	21.0651	21.5369	KARPAS-1718
26	Acalabrutinib	Alisertib	uM	uM	inhibition	TRUE	< 2e-324	8.15e-265	0.0308	0.876	0.00647	0.795	-7.72393	-0.0841816	-9.11413	1.62872	0.361664	0.000717238	15.2198	34.6222	31.0031	41.749	36.376	KARPAS-1718
27	Acalabrutinib	AZD4320	uM	uM	inhibition	TRUE	< 2e-324	< 2e-324	0.0775	1.18e-09	0.084	2.13e-08	3.18343	6.58238	3.04488	6.92923	0.401557	0.000122771	15.5793	78.7624	67.3731	84.9375	76.1553	KARPAS-1718
28	Acalabrutinib	AZD5991	uM	uM	inhibition	TRUE	3.55e-139	3.96e-108	5.28e-12	0.000383	2.97e-10	0.000209	-9.6207	-3.74321	-9.98293	-3.96333	0.0136021	0.0019149	40.056	10.6329	37.1219	35.7485	36.4352	KARPAS-1718
29	Acalabrutinib	Taselisib	uM	uM	inhibition	TRUE	< 2e-324	< 2e-324	3.4e-16	0.18	1.46e-29	0.156	-14.3901	1.49324	-14.5433	1.5293	0.102192	0.0182485	34.1602	49.1613	52.655	51.0626	51.8588	KARPAS-1718
30	Acalabrutinib	Venetoclax	uM	uM	inhibition	TRUE	< 2e-324	< 2e-324	0.0558	1.81e-13	0.0507	5.89e-10	-3.07522	6.02468	-3.30554	5.18631	0.00299089	0.000799741	33.9678	53.4093	63.4828	57.1159	60.2993	KARPAS-1718
1	Acalabrutinib	AZD1208	uM	uM	inhibition	TRUE	< 2e-324	< 2e-324	8.88e-08	3.38e-39	7.16e-08	1.16e-22	-2.94078	7.97225	-2.95392	7.50824	0.0314439	6.51965	30.1671	59.6671	93.6296	67.3409	80.4852	OCI-LY3
2	Acalabrutinib	AZD2461	uM	uM	inhibition	TRUE	< 2e-324	< 2e-324	0.0215	0.178	0.00825	0.512	-4.23606	1.15338	-4.77707	0.761134	0.279728	1.10137	13.9794	48.6753	52.9579	51.7563	52.3571	OCI-LY3
3	Acalabrutinib	AZD3463	uM	uM	inhibition	TRUE	< 2e-324	< 2e-324	0.375	5.34e-14	0.59	2.04e-09	1.62676	6.95462	1.20065	5.90117	0.191402	4.72112	19.9774	23.3274	66.6062	43.2037	54.9049	OCI-LY3
4	Acalabrutinib	AZD4573	uM	uM	inhibition	TRUE	< 2e-324	< 2e-324	0.0482	0.02	0.0608	0.00888	-4.54226	1.68963	-5.79109	1.62163	0.136987	0.00465281	20.3637	23.0874	50.285	31.7407	41.0129	OCI-LY3
5	Acalabrutinib	AZD7648	uM	uM	inhibition	TRUE	< 2e-324	< 2e-324	6.55e-05	0.000195	3.6e-05	0.00729	-7.79234	3.22843	-8.03425	2.4797	0.0492332	8.32816	26.0684	36.1561	73.1812	42.3048	57.743	OCI-LY3
6	Acalabrutinib	AZD8186	uM	uM	inhibition	TRUE	< 2e-324	< 2e-324	6.68e-05	0.625	9.4e-05	0.586	-11.292	-0.775378	-11.3388	-0.863975	0.239477	0.186793	20.0459	45.6468	39.1105	44.4973	41.8039	OCI-LY3
7	Acalabrutinib	Capivasertib	uM	uM	inhibition	TRUE	< 2e-324	< 2e-324	0.000504	0.00605	0.00123	0.0256	-3.50744	2.28651	-3.99077	1.92327	0.2155	5.46829	11.5329	36.2695	62.918	40.5379	51.7279	OCI-LY3
8	Acalabrutinib	Crizotinib	uM	uM	inhibition	TRUE	< 2e-324	< 2e-324	0.0391	3.76e-14	0.0592	3.8e-16	4.67685	10.2041	6.4751	9.33029	0.169074	7.58943	12.8219	28.7124	69.2211	50.8698	60.0455	OCI-LY3
9	Acalabrutinib	Daporinad	uM	uM	inhibition	TRUE	< 2e-324	< 2e-324	0.0353	5.31e-18	0.0153	1.1e-18	3.83221	8.81268	4.9244	7.9878	0.313682	0.00791756	11.7321	18.9505	70.3552	35.5251	52.9402	OCI-LY3
10	Acalabrutinib	Doxorubicin HCl	uM	uM	inhibition	TRUE	< 2e-324	< 2e-324	0.0405	0.0213	0.0114	0.643	-2.32788	2.43117	-3.64917	1.0913	0.307223	0.00935203	12.9362	16.4531	60.9126	27.3411	44.1268	OCI-LY3
11	Acalabrutinib	Fexagratinib	uM	uM	inhibition	TRUE	< 2e-324	< 2e-324	8.29e-07	1.1e-05	3.2e-05	2.32e-05	-8.27889	-3.76655	-9.4325	-4.75288	0.110251	3.64147	20.2331	13.9633	30.8247	19.4507	25.1377	OCI-LY3
12	Acalabrutinib	Lapatinib	uM	uM	inhibition	TRUE	< 2e-324	4.99e-90	1.95e-11	5.23e-37	8.27e-28	3.02e-31	-11.0731	-9.51041	-12.1031	-9.84569	0.309728	5.60919	17.059	3.1782	7.9745	11.6356	9.80505	OCI-LY3
13	Acalabrutinib	Olaparib	uM	uM	inhibition	TRUE	< 2e-324	< 2e-324	0.000818	0.635	0.000141	0.178	-7.5594	-0.431946	-8.81611	-1.30391	0.175008	1.27869	22.5238	51.728	67.7385	53.5707	60.6546	OCI-LY3
14	Acalabrutinib	Palbociclib HCl	uM	uM	inhibition	TRUE	< 2e-324	< 2e-324	2.71e-15	1.28e-96	2.83e-14	3.03e-89	21.0573	33.2364	21.3802	31.3411	0.0148684	1.10998	33.2821	33.6197	86.8288	77.846	82.3374	OCI-LY3
15	Acalabrutinib	Prexasertib	uM	uM	inhibition	TRUE	< 2e-324	6.54e-164	1.09e-14	4.05e-08	1.87e-10	0.00396	-6.95936	-2.22211	-7.23276	-2.14829	0.573627	0.00325151	18.3208	6.6051	17.0885	20.486	18.7873	OCI-LY3
16	Acalabrutinib	Saracatinib	uM	uM	inhibition	TRUE	< 2e-324	< 2e-324	0.00188	0.00299	0.0089	0.00328	-5.75644	-2.75132	-7.6393	-3.00274	0.0402624	4.22342	17.5837	20.0394	49.5345	24.7779	37.1562	OCI-LY3
17	Acalabrutinib	Saruparib	uM	uM	inhibition	TRUE	< 2e-324	< 2e-324	0.000138	0.0802	0.000315	0.0998	-4.78527	1.66796	-4.75488	1.59507	0.312045	0.414674	18.9208	65.9473	65.2316	66.389	65.8103	OCI-LY3
18	Acalabrutinib	Selumetinib	uM	uM	inhibition	TRUE	< 2e-324	< 2e-324	0.0299	0.752	0.00268	0.264	-7.21518	-0.624271	-10.102	7.17956	0.583634	7.25325	13.5636	27.1405	28.5965	35.7761	32.1863	OCI-LY3
19	Acalabrutinib	Silmitasertib	uM	uM	inhibition	TRUE	< 2e-324	< 2e-324	0.00869	0.171	0.0286	0.0235	-8.03323	-1.58111	-8.94652	-2.76513	0.225633	9.56464	20.1913	31.6291	86.6844	36.7437	61.7141	OCI-LY3
20	Acalabrutinib	Vandetanib	uM	uM	inhibition	TRUE	6.79e-213	1.19e-157	7.19e-05	9.39e-09	3.06e-08	7.76e-09	-6.35421	-5.13108	-10.8269	-6.41884	0.220063	6.32181	23.2233	14.0446	51.0517	27.0594	39.0555	OCI-LY3
21	Acalabrutinib	Vorinostat	uM	uM	inhibition	TRUE	< 2e-324	< 2e-324	0.0141	0.00875	0.0233	0.0266	-2.93797	2.65015	-3.08151	2.10527	0.288824	0.526873	14.4804	35.6398	74.8165	42.2875	58.552	OCI-LY3
22	Acalabrutinib	AZD1480	uM	uM	inhibition	TRUE	< 2e-324	< 2e-324	0.501	0.000191	0.51	0.000408	1.42626	6.84694	1.67767	6.4049	0.100866	1.0772	15.9088	48.728	71.6032	62.0494	66.8263	OCI-LY3
23	Acalabrutinib	Ceralasertib	uM	uM	inhibition	TRUE	< 2e-324	< 2e-324	0.000423	0.593	0.00304	0.104	-4.41404	-0.430227	-5.3212	-1.16427	0.173867	0.231207	22.2855	49.4886	46.2387	54.6177	50.4282	OCI-LY3
24	Acalabrutinib	AZD8055	uM	uM	inhibition	TRUE	< 2e-324	< 2e-324	0.825	0.024	0.86	0.0163	0.888543	6.81127	0.842009	6.67791	0.242406	0.0301782	17.4245	41.7117	67.3702	54.6717	61.0209	OCI-LY3
25	Acalabrutinib	Adavosertib	uM	uM	inhibition	TRUE	< 2e-324	< 2e-324	0.00276	0.0543	0.00173	0.0583	-3.45011	-1.43301	-3.52373	-1.61095	0.0913894	0.00708268	23.4381	2.7466	21.556	22.9766	22.2663	OCI-LY3
26	Acalabrutinib	Alisertib	uM	uM	inhibition	TRUE	< 2e-324	< 2e-324	9.05e-16	0.0545	3.92e-14	0.00776	-11.0966	-1.79429	-12.1564	-2.11129	0.144774	0.000561501	22.9948	19.6156	22.5012	25.9386	24.2199	OCI-LY3
27	Acalabrutinib	AZD4320	uM	uM	inhibition	TRUE	< 2e-324	< 2e-324	0.0585	5.46e-22	0.054	1.29e-16	-6.24043	7.40041	-6.31068	6.60344	0.0576239	0.00297105	25.4576	25.0514	40.6101	37.6632	39.1367	OCI-LY3
28	Acalabrutinib	AZD5991	uM	uM	inhibition	TRUE	< 2e-324	< 2e-324	0.162	7.18e-10	0.213	7.92e-11	-1.49834	8.38141	-1.49792	7.72374	0.197096	0.135608	23.2614	54.5881	65.228	62.1652	63.6966	OCI-LY3
29	Acalabrutinib	Taselisib	uM	uM	inhibition	TRUE	< 2e-324	< 2e-324	6.15e-26	0.308	2.72e-23	0.31	-8.8016	-0.925342	-8.19035	-0.957684	0.0423276	0.0666221	23.6757	65.9694	59.4376	64.9142	62.1759	OCI-LY3
30	Acalabrutinib	Venetoclax	uM	uM	inhibition	TRUE	< 2e-324	< 2e-324	0.0561	0.00958	0.109	0.00258	-9.25584	2.00823	-9.04616	1.75516	0.181444	0.00050774	20.5106	19.3963	24.1048	27.5991	25.8519	OCI-LY3
1	Acalabrutinib	Adavosertib	uM	uM	inhibition	TRUE	2.36e-215	2.26e-175	0.000499	0.00312	0.000444	0.00159	-8.9059	-7.11614	-9.82975	-7.59885	0.00148698	0.0030878	54.0234	9.6755	51.5337	29.7784	40.6561	OCI-LY10
2	Acalabrutinib	AZD2461	uM	uM	inhibition	TRUE	< 2e-324	< 2e-324	0.786	6.02e-05	0.892	0.0412	0.617596	5.1678	-0.336299	2.50137	0.0045015	1.15243	37.2312	52.5384	77.636	84.3794	81.0077	OCI-LY10
3	Acalabrutinib	AZD3463	uM	uM	inhibition	TRUE	< 2e-324	< 2e-324	0.00084	2.22e-22	0.00948	4.48e-15	4.46085	9.10507	4.61206	5.96511	0.00248117	0.807722	45.8864	47.8604	80.481	85.665	83.073	OCI-LY10
4	Acalabrutinib	AZD4573	uM	uM	inhibition	TRUE	< 2e-324	< 2e-324	0.0356	0.132	0.0554	5.12e-09	-4.23834	-1.23133	-5.50689	-4.29539	0.00227135	0.00164383	49.7159	37.841	68.006	63.4142	65.7101	OCI-LY10
5	Acalabrutinib	AZD7648	uM	uM	inhibition	TRUE	< 2e-324	< 2e-324	0.825	8e-05	0.895	0.00862	0.922888	7.547	0.595926	5.13517	0.00326122	4.02409	51.4366	35.7544	80.5823	85.6208	83.1016	OCI-LY10
6	Acalabrutinib	AZD8055	uM	uM	inhibition	TRUE	< 2e-324	2.13e-302	0.0733	0.00253	0.00414	9.62e-07	-4.56417	-3.12993	-7.66637	-4.66947	0.00209135	0.00530279	46.0608	25.7053	62.7768	41.9243	52.3505	OCI-LY10
7	Acalabrutinib	Capivasertib	uM	uM	inhibition	TRUE	< 2e-324	< 2e-324	5.86e-05	0.449	1.11e-06	0.125	-2.17559	0.694712	-4.41318	-1.51431	0.00181833	0.214841	49.6523	62.1606	69.1133	73.6846	71.3989	OCI-LY10
8	Acalabrutinib	Daporinad	uM	uM	inhibition	TRUE	7.38e-135	8.97e-141	0.795	0.754	0.674	0.26	-0.748327	-0.434369	-1.7363	-1.18642	0.00356569	0.00048786	35.3916	15.5506	46.2201	69.3363	57.7782	OCI-LY10
9	Acalabrutinib	Doxorubicin HCl	uM	uM	inhibition	TRUE	< 2e-324	< 2e-324	0.776	0.00751	0.841	0.975	0.562585	3.63492	-0.468762	0.0413032	0.00547775	0.00969535	46.223	14.647	72.9404	79.6658	76.3031	OCI-LY10
10	Acalabrutinib	Fexagratinib	uM	uM	inhibition	TRUE	5.79e-191	< 2e-324	0.647	0.509	0.668	0.664	0.885787	1.11616	-1.13072	-1.20082	0.00249399	7.11715	42.5915	20.959	69.8437	69.9548	69.8992	OCI-LY10
11	Acalabrutinib	Lapatinib	uM	uM	inhibition	TRUE	9.84e-151	9.37e-204	4.13e-33	3.85e-06	1.1e-39	0.000513	-13.1018	-6.7095	-14.2208	-5.66221	0.00502987	0.867504	56.5147	19.6855	47.1083	69.8748	58.4915	OCI-LY10
12	Acalabrutinib	Palbociclib HCl	uM	uM	inhibition	TRUE	< 2e-324	< 2e-324	9.14e-34	2.86e-17	5.65e-28	5.2e-29	-7.49337	-7.36292	-11.385	-9.40341	0.00237456	9.85509	43.7917	54.1066	95.1927	48.0529	71.6228	OCI-LY10
13	Acalabrutinib	Prexasertib	uM	uM	inhibition	TRUE	< 2e-324	< 2e-324	0.00889	0.473	0.00124	0.247	-4.95718	-1.86077	-8.20524	-3.58788	0.000855984	0.00705514	52.0894	37.5284	82.7375	43.2956	63.0166	OCI-LY10
14	Acalabrutinib	Saracatinib	uM	uM	inhibition	TRUE	4.61e-123	8.17e-104	0.0569	0.0245	0.00107	0.0153	-7.42235	-7.33218	-10.3867	-9.79431	0.00175566	2.2222	57.6977	33.4662	65.2864	48.9621	57.1243	OCI-LY10
15	Acalabrutinib	Selumetinib	uM	uM	inhibition	TRUE	< 2e-324	< 2e-324	3.25e-14	0.624	2.13e-12	0.443	-8.08091	0.402752	-9.08862	-0.545652	0.00130639	0.0439698	58.0394	45.6193	61.9359	54.5525	58.2442	OCI-LY10
16	Acalabrutinib	Silmitasertib	uM	uM	inhibition	TRUE	< 2e-324	< 2e-324	0.834	0.282	0.975	0.476	0.368651	1.77759	-0.0790939	-0.855484	0.00282123	4.4796	40.7108	39.5878	82.8794	77.0674	79.9734	OCI-LY10
17	Acalabrutinib	Vandetanib	uM	uM	inhibition	TRUE	2.21e-137	< 2e-324	0.00353	4.44e-05	3.92e-06	1.42e-10	-5.56175	-7.07567	-9.4273	-10.6389	0.00211083	3.32882	52.063	19.2524	73.2087	36.4917	54.8502	OCI-LY10
18	Acalabrutinib	Vorinostat	uM	uM	inhibition	TRUE	< 2e-324	< 2e-324	0.00465	0.155	8.6e-08	5.87e-06	-2.26137	-1.2428	-5.53097	-4.05296	0.00312298	0.275951	45.364	66.8494	58.4738	85.292	71.8829	OCI-LY10
19	Acalabrutinib	Saruparib	uM	uM	inhibition	TRUE	< 2e-324	< 2e-324	0.302	0.00532	0.0401	0.477	-1.95284	4.82447	-3.59029	7.47906	0.00607949	0.0100968	43.0874	71.0444	54.355	86.0462	70.2006	OCI-LY10
20	Acalabrutinib	Venetoclax	uM	uM	inhibition	TRUE	< 2e-324	< 2e-324	0.000133	0.399	3.25e-06	0.0403	-7.94402	-1.28069	-9.4379	-3.07465	0.00149521	0.00040623	57.3967	57.0589	72.3003	70.5222	71.4112	OCI-LY10
21	Acalabrutinib	Alisertib	uM	uM	inhibition	TRUE	6.01e-116	4e-245	1.11e-20	7.06e-18	1.28e-20	1.23e-28	-14.2438	-15.9493	-21.4177	-17.6504	0.0021819	0.00363408	50.475	29.8498	50.3985	28.5437	39.4711	OCI-LY10
22	Acalabrutinib	Olaparib	uM	uM	inhibition	TRUE	< 2e-324	< 2e-324	0.000216	0.775	0.000141	0.284	-6.00152	-0.429612	-7.94876	-1.32887	0.00200599	0.383197	50.7813	40.3283	67.3753	64.5271	65.9512	OCI-LY10
23	Acalabrutinib	AZD8186	uM	uM	inhibition	TRUE	< 2e-324	< 2e-324	0.00528	1.59e-39	0.0382	1.12e-25	1.75021	7.69041	1.5037	5.64372	0.00269453	0.00924521	51.2585	73.891	81.5662	96.3011	88.9337	OCI-LY10
24	Acalabrutinib	Ceralasertib	uM	uM	inhibition	TRUE	< 2e-324	< 2e-324	4.58e-10	0.00453	5.98e-16	1.23e-09	-5.3576	-2.03824	-6.65361	-4.54736	0.00158163	0.00943477	54.4167	77.6422	61.9719	75.739	68.8555	OCI-LY10
25	Acalabrutinib	AZD1480	uM	uM	inhibition	TRUE	< 2e-324	< 2e-324	0.641	0.2	0.817	0.405	0.751029	2.20717	0.515978	1.78982	0.00242264	0.60318	50.69	3.0884	59.2991	62.1395	60.7193	OCI-LY10
26	Acalabrutinib	AZD1208	uM	uM	inhibition	TRUE	< 2e-324	< 2e-324	0.392	6.38e-05	0.67	0.00399	2.31919	7.60021	1.43055	5.73962	0.00226152	0.438442	49.9655	33.987	75.5227	78.637	77.0798	OCI-LY10
27	Acalabrutinib	Crizotinib	uM	uM	inhibition	TRUE	< 2e-324	< 2e-324	0.00019	1.99e-05	2.56e-05	0.0169	10.7475	11.925	11.5951	8.74626	0.00399859	0.88479	39.6701	3.0229	75.1987	74.1787	74.6887	OCI-LY10
28	Acalabrutinib	AZD4320	uM	uM	inhibition	TRUE	< 2e-324	< 2e-324	0.0843	0.00179	0.0526	0.0357	-2.07136	3.978	-3.17793	2.70635	0.00231881	8.43976e-05	48.7422	55.2388	62.2006	78.2185	70.2095	OCI-LY10
29	Acalabrutinib	Taselisib	uM	uM	inhibition	TRUE	< 2e-324	< 2e-324	0.102	1.54e-13	0.228	1.33e-06	3.12494	8.97869	3.11909	6.16536	0.00213802	0.00734156	50.9286	30.9091	89.4951	76.7843	83.1397	OCI-LY10
30	Acalabrutinib	AZD5991	uM	uM	inhibition	TRUE	< 2e-324	< 2e-324	0.0028	0.293	0.0422	1.88e-05	-3.15933	0.66023	-3.78368	-2.02989	0.00149724	0.0387683	53.7889	31.5861	72.5769	56.6294	64.6031	OCI-LY10
1	Acalabrutinib	AZD1208	uM	uM	inhibition	TRUE	< 2e-324	1.66e-299	8e-07	0.00107	1.05e-09	3.96e-08	-6.83259	-2.92227	-7.22742	-3.98675	0.441582	9.10215	9.5993	52.2847	85.9743	54.6962	70.3353	SUDHL-2
2	Acalabrutinib	AZD2461	uM	uM	inhibition	TRUE	2.09e-76	1.14e-50	6.71e-13	4.01e-14	3.19e-11	2.94e-15	-12.8623	-9.95485	-12.4384	-11.5084	0.942052	4.3439	2.6789	32.5892	32.8447	27.7448	30.2948	SUDHL-2
3	Acalabrutinib	AZD3463	uM	uM	inhibition	TRUE	< 2e-324	< 2e-324	0.0659	0.47	0.439	0.185	-1.4294	0.602615	-0.983871	-1.83216	0.710866	2.54262	15.5569	25.4133	72.0994	42.6836	57.3915	SUDHL-2
4	Acalabrutinib	AZD4573	uM	uM	inhibition	TRUE	3.35e-301	< 2e-324	8.36e-10	5.15e-12	3.47e-09	1.23e-17	-9.96727	-11.2769	-13.6539	-11.9912	0.581045	0.00393182	5.9757	27.4118	37.3914	22.6817	30.0365	SUDHL-2
5	Acalabrutinib	AZD7648	uM	uM	inhibition	TRUE	< 2e-324	< 2e-324	1.01e-10	9.81e-15	1.77e-09	3.44e-12	-8.69748	-6.60419	-9.5543	-8.65291	0.681635	1.15206	6.1633	46.3565	42.2262	43.3708	42.7985	SUDHL-2
6	Acalabrutinib	AZD8186	uM	uM	inhibition	TRUE	1.6e-64	7.82e-59	0.236	0.0584	0.158	0.117	-2.69657	-3.9576	-4.48373	-4.2541	0.733337	4.57585	3.6106	14.6287	28.1749	32.0835	30.1292	SUDHL-2
7	Acalabrutinib	Capivasertib	uM	uM	inhibition	TRUE	7.81e-144	1.56e-90	1.25e-10	2.34e-10	7.12e-12	1.65e-08	-11.3669	-7.02592	-11.5698	-6.69144	0.353004	9.30656	8.8123	43.5334	59.8317	40.454	50.1429	SUDHL-2
8	Acalabrutinib	Crizotinib	uM	uM	inhibition	TRUE	< 2e-324	< 2e-324	1.13e-05	0.000707	5.78e-06	0.000175	-9.29216	-6.37967	-10.1669	-6.34371	0.237049	1.00063	10.6362	55.5882	59.0871	49.3211	54.2041	SUDHL-2
9	Acalabrutinib	Daporinad	uM	uM	inhibition	TRUE	9.05e-235	< 2e-324	0.211	0.127	0.91	0.495	-1.55701	2.40351	0.249274	0.943467	0.348721	0.00377546	6.0684	45.6467	75.8028	53.5284	64.6656	SUDHL-2
10	Acalabrutinib	Doxorubicin HCl	uM	uM	inhibition	TRUE	1.38e-22	7.89e-52	4.98e-17	1e-15	3.17e-23	2.26e-14	-23.8547	-17.94	-24.0726	-16.8276	0.368608	0.00566024	12.638	30.6143	19.7183	20.8732	20.2958	SUDHL-2
11	Acalabrutinib	Fexagratinib	uM	uM	inhibition	TRUE	1.93e-116	1.58e-168	1.33e-12	1.06e-11	2.34e-15	3.29e-11	-18.2477	-16.069	-19.8522	-16.6635	0.179867	8.37966	9.8517	40.1818	76.9347	25.472	51.2034	SUDHL-2
12	Acalabrutinib	Lapatinib	uM	uM	inhibition	TRUE	7.32e-301	9.17e-28	0.00206	4.07e-11	6.76e-10	8.68e-07	-10.252	-15.4969	-18.0395	-17.2178	0.944445	4.66587	5.0482	25.3023	47.0139	31.8228	39.4183	SUDHL-2
13	Acalabrutinib	Olaparib	uM	uM	inhibition	TRUE	1.25e-99	< 2e-324	0.187	0.575	0.17	0.711	-3.01293	-0.775855	-3.37316	3.2586	0.351981	7.9414	3.8869	32.7148	66.1695	37.0786	51.624	SUDHL-2
14	Acalabrutinib	Palbociclib HCl	uM	uM	inhibition	TRUE	< 2e-324	< 2e-324	8.46e-15	4.86e-36	2.28e-13	5.97e-17	17.853	22.5773	18.8059	20.4692	0.400911	3.4016	5.5139	23.847	51.7537	55	53.3768	SUDHL-2
15	Acalabrutinib	Prexasertib	uM	uM	inhibition	TRUE	8.12e-50	3.16e-15	0.028	0.00116	0.034	0.305	-6.79273	-5.45127	-6.607	-4.19566	0.230473	0.00774255	5.9125	26.1207	37.1329	24.908	31.0205	SUDHL-2
16	Acalabrutinib	Saracatinib	uM	uM	inhibition	TRUE	8.89e-141	5.36e-122	9.29e-09	2.2e-08	1.47e-11	9.75e-09	-21.5187	-21.0722	-24.5538	-21.8	0.644933	10	5.022	39.4933	87.4836	23.8811	55.6823	SUDHL-2
17	Acalabrutinib	Saruparib	uM	uM	inhibition	TRUE	< 2e-324	< 2e-324	1.22e-10	0.0595	6.72e-10	0.1	-9.33611	-1.66503	-10.9917	-1.47538	0.551892	9.10487	17.1121	32.0012	76.8238	37.7513	57.2876	SUDHL-2
18	Acalabrutinib	Selumetinib	uM	uM	inhibition	TRUE	< 2e-324	2e-228	2.18e-08	0.0065	1.71e-08	0.000986	-8.92689	-5.04662	-9.15077	-5.76253	0.882079	0.681814	5.2884	35.9911	25.147	36.692	30.9195	SUDHL-2
19	Acalabrutinib	Silmitasertib	uM	uM	inhibition	TRUE	< 2e-324	< 2e-324	0.697	0.748	0.67	0.136	-0.858261	0.508159	1.20401	-1.81558	0.732752	1.50008	4.4524	34.9079	49.5204	44.3898	46.9551	SUDHL-2
20	Acalabrutinib	Vandetanib	uM	uM	inhibition	TRUE	< 2e-324	< 2e-324	0.00686	0.00353	0.00723	0.00992	-7.60428	-7.36579	-8.45175	-8.16298	0.60843	4.24569	2.0202	42.5554	76.4761	28.6318	52.554	SUDHL-2
21	Acalabrutinib	Vorinostat	uM	uM	inhibition	TRUE	< 2e-324	< 2e-324	5.77e-05	0.00076	0.00687	0.000363	-4.07994	-3.80568	-4.53208	-5.05093	0.721294	0.140923	2.3957	45.7761	56.8524	45.0291	50.9408	SUDHL-2
22	Acalabrutinib	AZD1480	uM	uM	inhibition	TRUE	< 2e-324	< 2e-324	1.07e-08	6.24e-05	4.8e-07	0.000123	-6.49758	-4.81943	-6.47385	-5.35143	0.637077	0.469031	3.3821	59.4212	42.0641	50.6935	46.3788	SUDHL-2
23	Acalabrutinib	Ceralasertib	uM	uM	inhibition	TRUE	< 2e-324	< 2e-324	0.0462	0.275	0.0247	0.0109	-4.07582	-2.0125	-4.71272	-4.32496	0.80401	0.143571	5.9094	58.7263	48.7146	57.9799	53.3473	SUDHL-2
24	Acalabrutinib	AZD8055	uM	uM	inhibition	TRUE	< 2e-324	< 2e-324	1.48e-10	1.67e-05	3.38e-08	7.57e-05	-7.81807	-4.75945	-7.45067	-4.68376	0.316327	0.0265496	6.1763	49.6964	65.7938	45.174	55.4839	SUDHL-2
25	Acalabrutinib	Adavosertib	uM	uM	inhibition	TRUE	2.75e-07	8.42e-05	0.000609	6.11e-05	8.35e-06	0.000635	-12.0281	-5.92921	-12.1335	-5.57255	0.292122	0.014728	10.7761	41.6515	46.3052	40.9173	43.6112	SUDHL-2
26	Acalabrutinib	Alisertib	uM	uM	inhibition	TRUE	< 2e-324	< 2e-324	0.0301	7.47e-20	2.84e-31	0.912	-8.85959	-6.18914	-6.78552	1.47847	0.414665	0.302394	5.3017	94.1345	71.9566	88.1232	80.0399	SUDHL-2
27	Acalabrutinib	AZD4320	uM	uM	inhibition	TRUE	< 2e-324	< 2e-324	0.0308	0.111	0.0136	0.0461	-0.886269	-0.616335	-0.911769	-0.779019	0.356984	0.000701695	5.6395	96.8731	23.0741	97.0533	60.0637	SUDHL-2
28	Acalabrutinib	AZD5991	uM	uM	inhibition	TRUE	1.1e-12	2.34e-11	2.01e-16	6.78e-10	5.47e-24	1.25e-06	-20.5127	-15.6116	-21.4915	-16.0841	0.166301	0.910802	10.8118	26.0276	13.8179	10.6062	12.212	SUDHL-2
29	Acalabrutinib	Taselisib	uM	uM	inhibition	TRUE	0.000881	0.0006	2.74e-09	2.5e-16	2.91e-07	1.86e-08	-20.8225	-18.0836	-20.7681	-16.7282	0.19144	3.53202	6.5486	32.0727	14.8675	20.9233	17.8954	SUDHL-2
30	Acalabrutinib	Venetoclax	uM	uM	inhibition	TRUE	2.41e-223	2.55e-76	8.72e-05	0.000467	8.31e-05	0.000944	-13.5628	-11.3298	-13.6646	-11.7567	0.459599	5.35806	5.1668	63.2175	71.7763	61.1311	66.4537	SUDHL-2
1	Acalabrutinib	Adavosertib	uM	uM	inhibition	TRUE	1.92e-09	5.66e-08	0.155	1.44e-05	0.166	0.175	-4.34964	-3.45169	-5.2737	-5.35364	0.57784	0.00445759	8.3333	3.3849	5.4788	18.3215	11.9002	SUDHL-4
2	Acalabrutinib	AZD2461	uM	uM	inhibition	TRUE	5.12e-169	2.97e-146	1.37e-05	0.000111	7.5e-05	4.81e-05	-5.27362	-2.81655	-5.10048	-3.36156	0.5313	2.98819	2.3986	31.0075	35.0925	33.1084	34.1005	SUDHL-4
3	Acalabrutinib	AZD3463	uM	uM	inhibition	TRUE	< 2e-324	< 2e-324	0.264	0.909	0.72	0.00976	-1.28119	-0.0928108	-0.585301	-1.35588	0.434912	2.02896	3.4925	32.6248	61.9355	42.8838	52.4096	SUDHL-4
4	Acalabrutinib	AZD4573	uM	uM	inhibition	TRUE	< 2e-324	< 2e-324	9.18e-09	5.27e-05	0.00342	1.43e-06	-5.94688	-3.22496	-5.36395	-3.78246	0.144793	0.00455234	4.7325	29.4962	58.0958	29.1631	43.6294	SUDHL-4
5	Acalabrutinib	AZD7648	uM	uM	inhibition	TRUE	7.14e-321	< 2e-324	0.403	0.421	0.911	0.977	1.16652	1.21634	0.256091	-0.0614631	0.761625	2.93244	4.7172	20.4831	50.4595	34.7803	42.6199	SUDHL-4
6	Acalabrutinib	AZD8055	uM	uM	inhibition	TRUE	1.85e-38	1.71e-49	0.000125	1.27e-38	2.25e-06	1.23e-13	-10.6631	-8.16313	-13.8706	-8.78521	0.152217	0.00947135	9.795	14.4607	39.2229	7.0338	23.1284	SUDHL-4
7	Acalabrutinib	Capivasertib	uM	uM	inhibition	TRUE	< 2e-324	< 2e-324	0.512	0.000323	0.624	0.0288	0.383952	2.31262	0.386923	2.01959	0.539125	0.0655208	10.9099	87.2523	55.6743	93.0058	74.3401	SUDHL-4
8	Acalabrutinib	Daporinad	uM	uM	inhibition	TRUE	< 2e-324	< 2e-324	0.172	0.991	0.296	0.839	-1.26989	-0.0130628	-1.9711	0.161453	0.264971	0.000587753	5.1588	56.5694	56.4131	61.3564	58.8847	SUDHL-4
9	Acalabrutinib	Doxorubicin HCl	uM	uM	inhibition	TRUE	< 2e-324	< 2e-324	0.123	0.451	0.699	0.439	-2.1409	-0.30806	-0.524155	-1.17308	0.281159	0.00834868	1.9577	9.4911	25.4783	15.6468	20.5626	SUDHL-4
10	Acalabrutinib	Fexagratinib	uM	uM	inhibition	TRUE	< 2e-324	< 2e-324	0.106	0.283	0.0979	0.104	-3.2345	-2.03604	-3.42962	-3.57325	0.799305	8.54015	1.6878	17.584	62.4448	15.8549	39.1499	SUDHL-4
11	Acalabrutinib	Lapatinib	uM	uM	inhibition	TRUE	1.7e-137	1.08e-163	7.39e-19	2.84e-35	1.05e-10	5.92e-35	-9.37293	-9.4141	-10.5271	-10.468	0.39211	4.56843	13.9041	14.5335	22.1849	9.2577	15.7213	SUDHL-4
12	Acalabrutinib	Palbociclib HCl	uM	uM	inhibition	TRUE	< 2e-324	< 2e-324	2.9e-43	8.7e-38	8.95e-46	1.34e-38	-8.89142	-8.26859	-9.17764	-8.41079	0.548307	0.0111584	3.8916	81.6792	45.9511	68.5629	57.257	SUDHL-4
13	Acalabrutinib	Prexasertib	uM	uM	inhibition	TRUE	1.03e-46	1.7e-33	0.708	0.164	0.148	0.306	-0.546095	-1.94508	-2.15121	-1.98455	0.665179	0.00672464	4.9916	5.2152	19.7455	17.6751	18.7103	SUDHL-4
14	Acalabrutinib	Saracatinib	uM	uM	inhibition	TRUE	< 2e-324	< 2e-324	0.471	0.501	0.914	0.7	-0.929209	0.967733	-0.23209	0.469488	0.536668	0.518652	1.7765	60.2601	60.1606	64.1493	62.1549	SUDHL-4
15	Acalabrutinib	Selumetinib	uM	uM	inhibition	TRUE	4.94e-43	8.39e-75	0.122	0.00465	0.00338	0.08	2.25651	1.66982	3.27882	4.44316	0.394527	1.72174	0.3364	3.6477	6.5998	10.545	8.5724	SUDHL-4
16	Acalabrutinib	Silmitasertib	uM	uM	inhibition	TRUE	< 2e-324	< 2e-324	0.589	0.0806	0.538	0.14	0.837623	2.30589	1.40371	1.6656	0.415601	5.61667	2.2081	27.4244	76.2598	34.659	55.4594	SUDHL-4
17	Acalabrutinib	Vandetanib	uM	uM	inhibition	TRUE	< 2e-324	< 2e-324	0.861	0.901	0.596	0.834	-0.367513	-0.380436	-1.60661	-0.593795	0.258491	1.60152	9.3333	34.9764	50.0128	37.8295	43.9211	SUDHL-4
18	Acalabrutinib	Vorinostat	uM	uM	inhibition	TRUE	< 2e-324	< 2e-324	1.17e-05	8.33e-05	0.000942	7.73e-06	-6.40112	-5.74839	-6.14887	-6.10602	0.410867	0.390507	2.3011	59.9178	35.0648	54.0496	44.5572	SUDHL-4
19	Acalabrutinib	Saruparib	uM	uM	inhibition	TRUE	< 2e-324	< 2e-324	0.000226	2.26e-10	0.00414	7.9e-05	3.31026	4.26269	3.57005	3.70688	0.77058	0.642195	2.2948	47.9803	57.2352	59.871	58.5531	SUDHL-4
20	Acalabrutinib	Venetoclax	uM	uM	inhibition	TRUE	< 2e-324	< 2e-324	0.858	0.00201	0.94	0.00167	0.225982	1.43569	0.105028	1.53102	0.220489	0.237561	4.3248	70.2168	59.1997	72.3	65.7498	SUDHL-4
21	Acalabrutinib	Alisertib	uM	uM	inhibition	TRUE	4.37e-194	3.73e-303	0.801	0.0478	0.518	0.673	0.335006	2.22184	0.813547	-1.02092	0.954901	8.58941	0.6873	18.8185	49.6327	30.7842	40.2084	SUDHL-4
22	Acalabrutinib	Olaparib	uM	uM	inhibition	TRUE	< 2e-324	< 2e-324	6.07e-59	2.5e-31	1.02e-48	3.26e-25	-6.83387	-5.4174	-6.94115	-5.55029	0.0801356	1.4744	6.3017	73.9867	72.735	69.3022	71.0186	SUDHL-4
23	Acalabrutinib	AZD8186	uM	uM	inhibition	TRUE	< 2e-324	< 2e-324	0.00138	2.49e-21	0.00175	5.79e-19	5.97041	11.7598	6.13618	11.7505	0.257641	2.72533	14.2945	59.8005	87.5108	71.6891	79.6	SUDHL-4
24	Acalabrutinib	Ceralasertib	uM	uM	inhibition	TRUE	2.09e-09	4.24e-16	0.511	0.68	0.477	0.474	-4.65966	-2.64667	-4.7141	-3.59831	0.789687	10	2.2048	33.2047	73.1828	42.4393	57.8111	SUDHL-4
25	Acalabrutinib	AZD1480	uM	uM	inhibition	TRUE	1.36e-205	1.08e-273	0.0195	1.14e-13	0.154	0.278	7.84312	9.41043	6.55719	7.08666	0.436647	10	10.3819	19.0977	96.9821	37.9754	67.4788	SUDHL-4
26	Acalabrutinib	AZD1208	uM	uM	inhibition	TRUE	8.5e-60	3.06e-55	0.115	0.00707	0.726	0.253	2.78381	4.97285	0.537939	8.85409	0.780856	3.00454	4.8105	26.6803	23.5643	39.7169	31.6406	SUDHL-4
27	Acalabrutinib	Crizotinib	uM	uM	inhibition	TRUE	< 2e-324	< 2e-324	2.35e-156	2.18e-120	4.97e-135	4.46e-116	-37.2015	-37.5895	-37.887	-37.8584	0.423707	0.0119567	2.3576	92.8706	6.5219	58.1689	32.3454	SUDHL-4
28	Acalabrutinib	AZD4320	uM	uM	inhibition	TRUE	< 2e-324	< 2e-324	0.00395	1.17e-17	5.13e-23	1.16e-17	-5.54139	-9.49802	-9.90457	-9.55016	0.577463	0.00712576	7.0851	95.4163	38.5106	97.1803	67.8454	SUDHL-4
29	Acalabrutinib	Taselisib	uM	uM	inhibition	TRUE	< 2e-324	< 2e-324	0.894	0.000527	0.921	0.000453	0.243979	4.42447	0.19536	4.52846	0.134455	0.529409	12.8939	65.492	68.3361	69.1711	68.7536	SUDHL-4
30	Acalabrutinib	AZD5991	uM	uM	inhibition	TRUE	< 2e-324	< 2e-324	5.27e-09	4.83e-24	2.65e-08	1.96e-21	12.9478	14.9517	13.9408	14.3834	0.13273	0.0905054	7.4141	44.5552	73.2134	63.2148	68.2141	SUDHL-4
1	Acalabrutinib	AZD1208	uM	uM	inhibition	TRUE	1.06e-97	3.55e-62	1.25e-06	9.27e-06	0.0001	2.1e-07	-9.57098	-4.80943	-8.65604	-5.054	0.233776	0.690321	6.3711	36.3933	29.3085	30.3889	29.8487	SUDHL-10
2	Acalabrutinib	AZD2461	uM	uM	inhibition	TRUE	4.66e-52	2.37e-72	1.5e-05	1.17e-07	9.18e-05	0.812	-9.24002	-4.03138	-9.15334	-2.14856	0.261564	0.367544	8.3747	37.5107	28.2404	32.5538	30.3971	SUDHL-10
3	Acalabrutinib	AZD3463	uM	uM	inhibition	TRUE	< 2e-324	< 2e-324	0.00197	3.28e-08	0.00541	1.32e-13	4.35671	6.68505	4.64192	6.52318	0.0369086	1.11184	3.9498	47.8131	77.9622	56.5803	67.2712	SUDHL-10
4	Acalabrutinib	AZD4573	uM	uM	inhibition	TRUE	< 2e-324	< 2e-324	0.000324	5.04e-07	6.34e-05	0.000157	-7.93606	-7.308	-9.59508	-8.079	0.413957	0.00519268	4.2324	27.1574	63.6927	19.6999	41.6963	SUDHL-10
5	Acalabrutinib	AZD7648	uM	uM	inhibition	TRUE	1.52e-182	5.74e-265	0.0115	0.018	0.0125	0.492	-4.06668	-2.22366	-4.39629	-5.0437	0.24539	1.82441	3.5794	21.4804	28.1017	18.9073	23.5045	SUDHL-10
6	Acalabrutinib	AZD8186	uM	uM	inhibition	TRUE	< 2e-324	< 2e-324	0.0564	0.227	0.0755	0.345	-2.09026	-1.44478	-2.12343	-2.51839	0.339129	0.746958	1.8182	55.5583	55.981	54.2594	55.1202	SUDHL-10
7	Acalabrutinib	Capivasertib	uM	uM	inhibition	TRUE	< 2e-324	< 2e-324	0.0722	0.00827	0.0227	0.0108	-2.75998	-1.23477	-3.07823	-1.16361	0.0646857	0.16337	7.8186	76.7365	55.3142	76.478	65.8961	SUDHL-10
8	Acalabrutinib	Crizotinib	uM	uM	inhibition	TRUE	< 2e-324	< 2e-324	6.42e-08	4.88e-19	2.65e-13	0.761	-9.50398	-8.91103	-10.9336	-4.16138	0.143966	0.625084	5.4284	58.6317	43.6937	51.0025	47.3481	SUDHL-10
9	Acalabrutinib	Daporinad	uM	uM	inhibition	TRUE	< 2e-324	< 2e-324	0.00326	4.51e-08	0.00176	0.213	3.82726	5.44307	4.70248	4.26414	0.209323	0.000773643	1.572	51.7293	74.731	58.2387	66.4848	SUDHL-10
10	Acalabrutinib	Doxorubicin HCl	uM	uM	inhibition	TRUE	1.96e-27	3.3e-56	0.000858	5.75e-07	0.000499	0.0114	-6.48602	-7.19182	-7.73104	-8.43648	0.37633	0.00697552	0.626	11.9198	17.3687	7.7014	12.5351	SUDHL-10
11	Acalabrutinib	Fexagratinib	uM	uM	inhibition	TRUE	< 2e-324	< 2e-324	2.55e-34	3.55e-15	1.22e-09	0.0943	-6.31955	-9.22811	-9.1779	-11.0977	0.440558	2.70547	5.2934	21.678	22.1856	16.186	19.1858	SUDHL-10
12	Acalabrutinib	Lapatinib	uM	uM	inhibition	TRUE	2.97e-237	3.02e-52	3.18e-06	1.06e-08	7.4e-09	2.58e-06	-8.62283	-6.55546	-10.7403	-6.91512	0.0588205	3.63422	7.939	28.4283	53.4621	22.4421	37.9521	SUDHL-10
13	Acalabrutinib	Olaparib	uM	uM	inhibition	TRUE	5.9e-29	3.82e-24	1.98e-08	1.7e-08	1.88e-07	0.534	-14.6543	-5.63295	-13.6002	-3.24644	0.19906	5.93961	19.0356	58.4218	65.4527	53.5182	59.4855	SUDHL-10
14	Acalabrutinib	Palbociclib HCl	uM	uM	inhibition	TRUE	< 2e-324	< 2e-324	0.0184	8.61e-11	0.0148	0.0146	14.6338	21.7113	16.2852	22.6161	0.3036	0.186035	10.8397	47.5851	59.1308	69.6428	64.3868	SUDHL-10
15	Acalabrutinib	Prexasertib	uM	uM	inhibition	TRUE	1.73e-61	1.05e-19	1.89e-39	5.91e-13	6.19e-32	1.01e-29	-18.4205	-6.20959	-18.5751	-6.57601	0.0390731	0.00765984	25.9904	48.7145	57.443	39.7848	48.6139	SUDHL-10
16	Acalabrutinib	Saracatinib	uM	uM	inhibition	TRUE	2.17e-26	1.02e-32	1.69e-06	1.9e-10	3.44e-12	1.29e-08	-17.3945	-10.7168	-17.2016	-11.0201	0.173945	9.26874	13.9309	45.1502	73.7471	37.2401	55.4936	SUDHL-10
17	Acalabrutinib	Saruparib	uM	uM	inhibition	TRUE	6.14e-217	< 2e-324	1.43e-07	8.94e-11	2.34e-07	3.62e-09	-12.1575	-8.5946	-12.6553	-8.53803	0.257158	5.31856	5.4649	29.7604	28.6209	20.7604	24.6907	SUDHL-10
18	Acalabrutinib	Selumetinib	uM	uM	inhibition	TRUE	0.000122	0.111	1.58e-37	6.15e-20	3.16e-24	1.67e-05	-19.6615	-18.8325	-21.8317	-16.3927	0.110763	3.47221	3.8315	12.4071	-3.8377	-5.2084	-4.52305	SUDHL-10
19	Acalabrutinib	Silmitasertib	uM	uM	inhibition	TRUE	2.53e-141	6.57e-181	0.0164	0.013	0.0383	0.996	-6.82184	-3.33742	-6.92648	-0.0650948	0.0377994	1.25554	10.5401	51.5836	60.6368	49.247	54.9419	SUDHL-10
20	Acalabrutinib	Vandetanib	uM	uM	inhibition	TRUE	< 2e-324	< 2e-324	0.693	0.795	0.603	0.812	-1.08001	0.455985	-1.51524	0.303656	0.463011	5.98514	4.2496	44.1535	85.8828	42.8498	64.3663	SUDHL-10
21	Acalabrutinib	Vorinostat	uM	uM	inhibition	TRUE	2.12e-63	< 2e-324	9.76e-06	2.62e-05	1.43e-06	0.000342	-10.4438	-6.92466	-11.4455	-8.73032	0.341353	0.948422	7.4946	28.9372	81.5697	20.8782	51.224	SUDHL-10
22	Acalabrutinib	AZD1480	uM	uM	inhibition	TRUE	3.68e-165	< 2e-324	0.00438	0.00126	0.00324	0.00531	-6.70722	-4.33207	-6.98235	-3.52259	0.0663449	1.88923	6.3689	33.9823	40.2909	29.7665	35.0287	SUDHL-10
23	Acalabrutinib	Ceralasertib	uM	uM	inhibition	TRUE	< 2e-324	< 2e-324	0.0671	0.103	0.0883	0.175	-4.81048	-3.83236	-6.11392	-3.74683	0.426287	0.484938	7.618	38.3064	49.1622	37.1366	43.1494	SUDHL-10
24	Acalabrutinib	AZD8055	uM	uM	inhibition	TRUE	< 2e-324	< 2e-324	7.14e-06	9.39e-12	6.01e-06	5.23e-15	-12.1654	-8.67036	-12.6396	-8.24903	0.320794	0.0995626	8.5869	45.5467	87.5145	36.5365	62.0255	SUDHL-10
25	Acalabrutinib	Adavosertib	uM	uM	inhibition	TRUE	< 2e-324	2.38e-303	0.676	3.21e-06	0.948	0.000139	-0.847658	3.15952	-0.138867	2.50856	0.128743	0.0829482	5.9842	41.0764	48.0458	43.6134	45.8296	SUDHL-10
26	Acalabrutinib	Alisertib	uM	uM	inhibition	TRUE	< 2e-324	< 2e-324	0.102	0.912	0.0622	0.894	-3.0653	-0.0864454	-3.44571	-0.106517	0.375491	0.00414715	11.2654	71.3042	49.1151	71.1028	60.109	SUDHL-10
27	Acalabrutinib	AZD4320	uM	uM	inhibition	TRUE	7.12e-20	1.46e-50	0.00666	0.0213	0.00406	0.0275	-6.84224	-5.28032	-6.84477	-5.14205	0.0674443	1.55581	1.7351	26.4348	21.4857	23.8795	22.6826	SUDHL-10
28	Acalabrutinib	AZD5991	uM	uM	inhibition	TRUE	0.371	0.844	0.0103	4.93e-06	0.00604	0.000543	-8.47439	-7.42434	-9.45788	-6.96005	0.275678	0.00651834	4.0302	8.7759	5.7901	4.5496	5.16985	SUDHL-10
29	Acalabrutinib	Taselisib	uM	uM	inhibition	TRUE	< 2e-324	< 2e-324	0.0783	0.000179	0.324	0.000455	2.88375	4.739	1.90584	5.2312	0.538149	0.750237	6.2532	51.5503	60.3429	60.5118	60.4273	SUDHL-10
30	Acalabrutinib	Venetoclax	uM	uM	inhibition	TRUE	0.00336	0.00399	1.39e-05	2.78e-10	6.31e-08	0.00233	-13.4118	-12.7937	-15.7259	-11.7689	0.122438	3.08413	4.6376	9.5228	-3.6677	-2.1033	-2.8855	SUDHL-10
25	Acalabrutinib	AZD1480	uM	uM	inhibition	TRUE	< 2e-324	< 2e-324	3.17e-39	3.37e-42	1.2e-22	0.103	11.8187	11.6766	11.312	7.8995	0.00582339	8.13274	26.3882	8.8617	90.1216	75.7446	82.9331	TMD8
7	Acalabrutinib	Capivasertib	uM	uM	inhibition	TRUE	< 2e-324	< 2e-324	0.00721	3.02e-19	0.0558	9.18e-22	7.97461	12.442	7.69986	9.82988	0.00729708	6.41856	25.4828	31.2918	82.5935	88.8001	85.6968	TMD8
5	Acalabrutinib	AZD7648	uM	uM	inhibition	TRUE	< 2e-324	< 2e-324	1.07e-12	5.02e-26	8.18e-11	5.58e-12	7.269	11.2585	8.23179	8.42155	0.00563556	8.53046	20.7855	20.9392	72.8624	67.8255	70.344	TMD8
3	Acalabrutinib	AZD3463	uM	uM	inhibition	TRUE	< 2e-324	< 2e-324	5.78e-06	1.24e-05	0.022	7.14e-05	4.8586	6.89555	4.53437	4.80425	0.00710205	8.90098	19.7725	27.3908	86.264	76.8167	81.5404	TMD8
19	Acalabrutinib	Saruparib	uM	uM	inhibition	TRUE	< 2e-324	< 2e-324	0.000465	3.77e-08	0.000421	8.99e-06	3.35121	5.98556	4.4197	3.83992	0.0089381	0.530658	20.5993	51.9306	69.0793	85.9529	77.5161	TMD8
27	Acalabrutinib	Crizotinib	uM	uM	inhibition	TRUE	< 2e-324	< 2e-324	0.155	3.22e-11	0.266	7.33e-07	3.13292	8.1878	3.68452	3.99737	0.00674425	0.56617	24.557	35.3719	51.5982	74.2074	62.9028	TMD8
9	Acalabrutinib	Doxorubicin HCl	uM	uM	inhibition	TRUE	< 2e-324	< 2e-324	0.00765	0.000842	0.0251	0.00841	2.77662	4.31763	3.82613	3.60337	0.00708775	0.00546043	19.3353	7.9473	36.7117	44.563	40.6373	TMD8
17	Acalabrutinib	Vandetanib	uM	uM	inhibition	TRUE	< 2e-324	< 2e-324	0.0904	0.0596	0.445	0.458	1.83726	2.46556	1.89973	-5.17262	0.00621807	9.3431	20.471	15.2481	94.9326	40.046	67.4893	TMD8
23	Acalabrutinib	AZD8186	uM	uM	inhibition	TRUE	< 2e-324	< 2e-324	0.333	0.0304	0.346	0.906	1.2165	2.82498	1.52875	0.144458	0.00693678	3.5893	24.4021	20.4381	68.7475	56.378	62.5628	TMD8
15	Acalabrutinib	Selumetinib	uM	uM	inhibition	TRUE	< 2e-324	< 2e-324	0.736	0.00145	0.881	0.023	0.418955	3.23489	0.261029	3.2017	0.00714869	2.31488	18.8699	17.5144	31.5772	40.1778	35.8775	TMD8
29	Acalabrutinib	Taselisib	uM	uM	inhibition	TRUE	< 2e-324	< 2e-324	0.984	0.0121	0.956	0.0229	-0.0409823	3.06527	0.139408	2.81283	0.00559354	0.0351129	30.4081	7.4292	35.944	59.6625	47.8032	TMD8
21	Acalabrutinib	Alisertib	uM	uM	inhibition	TRUE	< 2e-324	< 2e-324	0.868	0.00011	0.895	0.0145	-0.375079	3.45423	0.437415	1.8336	0.00686508	8.36962	22.8267	18.1375	57.2665	33.6311	45.4488	TMD8
1	Acalabrutinib	Adavosertib	uM	uM	inhibition	TRUE	1.95e-148	< 2e-324	0.401	0.797	0.419	0.722	-1.8333	0.695459	-1.83782	1.03164	0.00937145	0.00443535	27.5501	4.4423	28.724	57.5582	43.1411	TMD8
16	Acalabrutinib	Silmitasertib	uM	uM	inhibition	TRUE	< 2e-324	< 2e-324	8.69e-06	0.00172	0.00579	1.84e-12	-3.43232	-4.22315	-4.3339	-6.10118	0.00759493	4.44138	19.0076	21.2762	73.0871	27.0649	50.076	TMD8
22	Acalabrutinib	Olaparib	uM	uM	inhibition	TRUE	< 2e-324	< 2e-324	0.0735	0.92	0.191	0.79	-3.83042	-0.148098	-3.52803	-0.689006	0.00583045	1.37348	24.995	43.5715	47.5291	54.418	50.9736	TMD8
4	Acalabrutinib	AZD4573	uM	uM	inhibition	TRUE	< 2e-324	< 2e-324	2.49e-13	6.33e-09	2.83e-07	9.78e-22	-3.97626	-7.18769	-8.56935	-9.48703	0.00666012	0.00411899	22.2038	15.1422	35.6901	18.6049	27.1475	TMD8
11	Acalabrutinib	Lapatinib	uM	uM	inhibition	TRUE	2.54e-186	3.47e-182	0.000129	1.33e-09	1.02e-05	0.234	-4.40953	-5.94596	-6.92946	-15.1076	0.00548938	9.71508	27.4486	8.7599	77.4659	26.5325	51.9992	TMD8
20	Acalabrutinib	Venetoclax	uM	uM	inhibition	TRUE	< 2e-324	< 2e-324	8.05e-11	3.53e-07	1.22e-11	5.82e-17	-4.7115	-3.74002	-8.17893	-5.27581	0.00835671	0.487318	26.3019	56.9927	46.9308	56.2085	51.5697	TMD8
30	Acalabrutinib	AZD5991	uM	uM	inhibition	TRUE	< 2e-324	3.8e-270	6.14e-08	5.1e-49	6.04e-08	5.04e-13	-4.7462	-9.95062	-9.97509	-13.1957	0.00682875	0.5045	20.4871	13.8776	36.853	13.0627	24.9579	TMD8
18	Acalabrutinib	Vorinostat	uM	uM	inhibition	TRUE	< 2e-324	< 2e-324	4.25e-05	1.91e-06	5.45e-10	1.71e-11	-5.06229	-5.45666	-7.20385	-7.54263	0.0067641	0.397243	19.0069	60.0146	44.3133	56.3902	50.3518	TMD8
8	Acalabrutinib	Daporinad	uM	uM	inhibition	TRUE	< 2e-324	< 2e-324	2.52e-09	2.96e-14	1.51e-11	6.21e-33	-5.78399	-12.52	-13.1941	-13.8566	0.00796142	0.00157711	22.0474	35.8822	48.3858	31.5185	39.9522	TMD8
28	Acalabrutinib	AZD4320	uM	uM	inhibition	TRUE	< 2e-324	< 2e-324	0.0266	2.27e-09	6.01e-14	0.862	-6.5576	-11.4241	-16.0531	-2.70678	0.00576184	5.00727	25.3808	53.3409	56.7808	39.1292	47.955	TMD8
14	Acalabrutinib	Saracatinib	uM	uM	inhibition	TRUE	< 2e-324	< 2e-324	1.09e-09	5.6e-43	4.4e-42	4.56e-39	-6.63178	-12.0859	-12.9861	-14.8053	0.00658326	3.35782	24.5539	18.9852	49.3566	17.0242	33.1904	TMD8
13	Acalabrutinib	Prexasertib	uM	uM	inhibition	TRUE	2.39e-198	3.89e-161	9.15e-11	7.19e-10	1.16e-10	3.71e-17	-8.82473	-7.3544	-8.95307	-9.36809	0.00658762	0.00559145	30.5846	4.0362	27.7561	19.8038	23.7799	TMD8
2	Acalabrutinib	AZD2461	uM	uM	inhibition	TRUE	1.76e-204	2.19e-281	9.33e-25	1.13e-10	6.66e-10	1.23e-11	-8.99698	-7.75	-9.04106	-8.33078	0.00811789	1.14651	18.6302	19.8407	25.218	20.7841	23.001	TMD8
6	Acalabrutinib	AZD8055	uM	uM	inhibition	TRUE	7.57e-173	< 2e-324	2.11e-13	3.69e-15	8.54e-16	2.29e-15	-10.6137	-10.0333	-11.1214	-11.0377	0.00878152	0.00885282	19.7711	5.0544	18.4225	7.1157	12.7691	TMD8
12	Acalabrutinib	Palbociclib HCl	uM	uM	inhibition	TRUE	< 2e-324	< 2e-324	6.38e-10	3.73e-14	6.9e-25	7.81e-21	-11.3812	-9.03511	-14.953	-9.80703	0.00661614	8.09607	24.4212	59.8042	82.9021	50.2823	66.5922	TMD8
24	Acalabrutinib	Ceralasertib	uM	uM	inhibition	TRUE	1.54e-151	7.41e-196	2.01e-29	2.9e-68	8.34e-19	2.16e-05	-11.4154	-11.2835	-12.8401	-11.0413	0.00558826	5.07074	23.4209	10.0001	20.564	6.1888	13.3764	TMD8
10	Acalabrutinib	Fexagratinib	uM	uM	inhibition	TRUE	6.74e-284	< 2e-324	1.33e-47	5.86e-25	3.24e-22	1.39e-19	-11.558	-12.6063	-13.6393	-13.2297	0.00782656	5.2974	20.9219	7.8834	29.5356	7.2918	18.4137	TMD8
26	Acalabrutinib	AZD1208	uM	uM	inhibition	TRUE	5.48e-120	3.18e-63	2.51e-60	1.6e-59	7.06e-31	1.16e-65	-15.4345	-16.4756	-18.8267	-16.7242	0.00497658	0.145417	26.3129	10.0201	8.9517	2.4643	5.708	TMD8
22	Acalabrutinib	Olaparib	uM	uM	inhibition	TRUE	< 2e-324	< 2e-324	0.00152	1.01e-14	0.00163	1.13e-14	20.1531	34.5622	20.2373	33.5061	0.0151159	10	35.4937	42.451	90.6701	77.273	83.9715	U2932
27	Acalabrutinib	Crizotinib	uM	uM	inhibition	TRUE	< 2e-324	< 2e-324	1.82e-05	4.02e-117	5.84e-11	0.00175	12.7361	17.6676	11.1159	24.0884	0.600108	10	31.1102	22.1707	90.6294	52.8588	71.7441	U2932
23	Acalabrutinib	AZD8186	uM	uM	inhibition	TRUE	< 2e-324	< 2e-324	4.01e-15	2.08e-80	2.85e-15	8.62e-67	10.0186	21.3541	9.98117	20.7279	0.00281901	0.65412	39.0399	66.9741	91.6848	82.769	87.2269	U2932
16	Acalabrutinib	Silmitasertib	uM	uM	inhibition	TRUE	< 2e-324	< 2e-324	1.01e-62	2.91e-64	5.13e-35	7.95e-64	16.6918	19.1091	16.4989	17.8189	0.0486683	2.2279	23.4027	28.4348	82.6171	66.7482	74.6826	U2932
19	Acalabrutinib	Saruparib	uM	uM	inhibition	TRUE	< 2e-324	< 2e-324	0.000528	2.99e-70	0.0013	3.49e-63	7.61134	17.3656	7.48139	16.6537	0.442986	2.37794	30.5296	34.006	78.7807	66.7378	72.7592	U2932
7	Acalabrutinib	Capivasertib	uM	uM	inhibition	TRUE	< 2e-324	< 2e-324	0.0334	3.07e-34	0.0333	1.08e-31	5.68707	16.4887	5.73382	16.3021	0.270799	1.04082	29.9216	52.9899	78.4204	74.8245	76.6225	U2932
26	Acalabrutinib	AZD1208	uM	uM	inhibition	TRUE	< 2e-324	< 2e-324	0.00198	6.35e-97	0.00949	1.22e-31	-4.03311	15.2172	-3.70636	13.614	0.00295916	0.0151337	44.8566	35.3973	55.3914	45.2109	50.3011	U2932
4	Acalabrutinib	AZD4573	uM	uM	inhibition	TRUE	< 2e-324	< 2e-324	4.75e-18	1.01e-40	1.16e-17	3.27e-50	7.65634	13.339	8.28397	12.5381	0.00502856	0.00727261	28.7687	19.9317	85.6718	35.8685	60.7702	U2932
13	Acalabrutinib	Prexasertib	uM	uM	inhibition	TRUE	4.68e-254	1.7e-236	1.72e-06	6.49e-12	8.76e-08	1.91e-05	11.6014	14.5547	11.0674	12.3271	0.721891	0.01	15.6458	7.5195	62.6729	41.5197	52.0963	U2932
30	Acalabrutinib	AZD5991	uM	uM	inhibition	TRUE	< 2e-324	< 2e-324	0.00015	2.08e-82	0.000948	5.04e-71	7.60272	12.3087	7.29147	11.6456	0.00203203	0.451408	35.8637	7.5268	67.7839	19.6467	43.7153	U2932
25	Acalabrutinib	AZD1480	uM	uM	inhibition	TRUE	< 2e-324	< 2e-324	0.939	0.0564	0.156	0.283	0.191354	3.02642	-2.72206	11.0004	0.70102	4.70439	39.5071	21.3307	79.4437	49.7975	64.6206	U2932
21	Acalabrutinib	Alisertib	uM	uM	inhibition	TRUE	< 2e-324	< 2e-324	0.377	7.41e-08	0.397	0.42	2.22115	6.01724	1.01124	9.26248	0.20301	9.60142	36.7982	7.8598	75.2211	33.7721	54.4966	U2932
20	Acalabrutinib	Venetoclax	uM	uM	inhibition	TRUE	< 2e-324	< 2e-324	0.946	7.16e-11	0.859	1.84e-12	-0.251445	9.80162	-0.681575	8.77697	0.0230165	0.427189	35.8923	49.1968	64.4103	65.1627	64.7865	U2932
8	Acalabrutinib	Daporinad	uM	uM	inhibition	TRUE	< 2e-324	< 2e-324	0.0772	1.53e-21	0.106	4e-09	3.40372	9.41643	4.74239	7.45868	0.0389246	0.00984052	22.3969	18.0201	71.6819	43.198	57.44	U2932
14	Acalabrutinib	Saracatinib	uM	uM	inhibition	TRUE	< 2e-324	< 2e-324	0.711	5.88e-21	0.935	1.49e-23	-0.709396	8.25574	-0.207562	6.97492	0.178932	3.62338	28.3665	27.9772	55.9755	51.0431	53.5093	U2932
5	Acalabrutinib	AZD7648	uM	uM	inhibition	TRUE	< 2e-324	< 2e-324	0.949	4.22e-14	0.715	2.13e-12	-0.0782092	7.60452	-0.481179	6.60003	0.00686788	3.09089	37.2438	17.1044	59.1659	42.8057	50.9858	U2932
15	Acalabrutinib	Selumetinib	uM	uM	inhibition	TRUE	< 2e-324	< 2e-324	0.24	1.71e-10	0.23	3.89e-08	2.38202	6.64637	2.4456	6.25719	0.00248962	1.4211	27.7956	5.9592	34.2193	21.0383	27.6288	U2932
3	Acalabrutinib	AZD3463	uM	uM	inhibition	TRUE	< 2e-324	< 2e-324	0.0837	5.17e-05	0.0517	0.312	2.95253	4.83974	2.75898	5.89246	0.249404	2.19514	28.7776	27.7225	71.5703	50.0038	60.7871	U2932
9	Acalabrutinib	Doxorubicin HCl	uM	uM	inhibition	TRUE	< 2e-324	< 2e-324	0.145	8.08e-12	0.178	3.85e-09	2.94862	5.16932	2.65817	5.36626	0.578677	0.00239417	29.0798	3.6543	34.5999	40.357	37.4785	U2932
24	Acalabrutinib	Ceralasertib	uM	uM	inhibition	TRUE	< 2e-324	< 2e-324	5.56e-06	6.72e-58	0.00292	0.072	2.82534	7.09021	2.7685	5.00246	0.00528928	4.46658	36.1551	6.409	54.7641	24.7125	39.7383	U2932
2	Acalabrutinib	AZD2461	uM	uM	inhibition	TRUE	< 2e-324	< 2e-324	0.403	0.000159	0.371	0.000845	1.2217	4.94053	1.28247	4.18777	0.0143767	6.82464	28.4554	4.5721	39.121	25.4003	32.2606	U2932
17	Acalabrutinib	Vandetanib	uM	uM	inhibition	TRUE	< 2e-324	< 2e-324	0.535	0.00589	0.161	0.626	-1.29683	2.40118	-2.00466	3.98755	0.108051	4.48223	36.8911	19.1275	77.2198	41.8796	59.5497	U2932
1	Acalabrutinib	Adavosertib	uM	uM	inhibition	TRUE	8.79e-239	< 2e-324	0.361	0.0118	0.5	0.0148	1.23966	3.66026	1.09713	3.59655	0.108049	0.00588176	30.1633	3.3749	35.1347	30.3653	32.75	U2932
28	Acalabrutinib	AZD4320	uM	uM	inhibition	TRUE	1.56e-199	< 2e-324	0.352	0.0115	0.532	0.0784	1.74547	3.91459	1.55827	2.95335	0.0151044	0.00647279	36.258	3.7019	48.539	31.2706	39.9048	U2932
18	Acalabrutinib	Vorinostat	uM	uM	inhibition	TRUE	< 2e-324	< 2e-324	7.07e-11	1.34e-10	5.35e-06	3.99e-07	-3.50261	3.12774	-3.41442	2.52385	0.116444	1.05237	31.769	43.0733	58.7772	57.0197	57.8984	U2932
6	Acalabrutinib	AZD8055	uM	uM	inhibition	TRUE	< 2e-324	< 2e-324	0.298	0.000405	0.141	0.000239	-0.749579	1.73282	-1.23261	1.53374	0.00694534	0.00305981	32.0454	3.6885	36.2847	24.4329	30.3588	U2932
29	Acalabrutinib	Taselisib	uM	uM	inhibition	TRUE	< 2e-324	< 2e-324	7.65e-11	0.00107	1.58e-07	6.11e-05	-8.38973	-2.84803	-8.25839	-4.04376	0.00353402	0.00695255	44.1925	8.3166	43.1729	32.9844	38.0787	U2932
10	Acalabrutinib	Fexagratinib	uM	uM	inhibition	TRUE	< 2e-324	< 2e-324	0.00468	0.00563	0.0081	0.00429	-7.40756	-3.32281	-8.68422	-4.1968	0.00568502	8.7212	34.8983	6.5423	48.7384	20.0796	34.409	U2932
12	Acalabrutinib	Palbociclib HCl	uM	uM	inhibition	TRUE	< 2e-324	< 2e-324	9.79e-14	1.56e-06	1.27e-08	1.99e-08	-4.96572	-3.77254	-4.72812	-4.35739	0.00243915	4.04372	34.1252	14.8268	59.5396	31.1615	45.3505	U2932
11	Acalabrutinib	Lapatinib	uM	uM	inhibition	TRUE	5.32e-222	1.22e-294	1.42e-07	0.000409	2.19e-07	4.67e-05	-7.07501	-4.78322	-7.67355	-5.37003	0.00373151	5.87072	38.4035	10.8384	55.2881	28.726	42.007	U2932
